# Supplementary material for: The carboxyl-terminal sequence of bim enables bax activation and killing of unprimed cells
Source: eLife. 2020 Jan 24;9:e44525. doi: 10.7554/eLife.44525 (PMC6980855; doi:10.7554/eLife.44525)
Supplement: Figure 1—figure supplement 1—source data 1. [file elife-44525-fig1-figsupp1-data1.xlsx]

## Sheet: HEK293
Figure 1 - Figure supplement 1
Cell line:	HEK293
						Transfection
		VBimL			VBimL-dCTS			VBimL-4E
	Venus Intensity	Mean AnnexinV Rhodamine Intensity	SEM	N	Mean AnnexinV Rhodamine Intensity	SEM	N	Mean AnnexinV Rhodamine Intensity	SEM	N
	168.413	76.8125	0.914887	3530
	241.946	102.836	4.55197	286
	348.285	117.998	7.31514	124
	453.556	124.52	12.0685	80
	548.426	152.096	22.2294	39
	643.948	230.29	37.6465	29
	741.822	225.015	30.8079	23
	844.245	228.876	41.2105	20
	949.723	235.956	43.3499	19
	1442.9	318.272	30.2448	49
	168.939				74.6249	0.627871	2846
	239.711				86.6856	4.01059	332
	341.575				75.9977	2.65805	125
	441.678				83.7311	5.85108	72
	546.522				70.1402	1.17547	61
	646.219				94.238	11.3833	42
	744.018				74.864	3.31528	26
	850.655				83.8839	12.4388	19
	955.052				79.9889	4.72	28
	2916.1				90.9573	5.53951	386
	170.047							78.1628	1.13114	3013
	236.726							92.5154	6.78093	281
	348.165							76.9417	2.70904	105
	447.68							73.8816	0.983662	70
	548.388							72.4195	0.878464	48
	647.096							76.2339	4.17209	33
	748.277							75.5893	2.61853	37
	848.325							74.7971	2.69452	26
	949.468							71.677	1.3294	16
	2779.71							78.1268	1.12397	280

## Sheet: Cama-1
Cell line:	CAMA-1
						Transfection
		VBimL			VBimL-dCTS			VBimL-4E
	Venus Intensity	Mean AnnexinV Rhodamine Intensity	SEM	N	Mean AnnexinV Rhodamine Intensity	SEM	N	Mean AnnexinV Rhodamine Intensity	SEM	N
	167.5	96.8316	0.789903	8168
	217.5	158.04	1.85231	5506
	267.5	394.336	17.8231	86
	317.5	330.038	43.1234	29
	525	142.097	46.572	17
	172.5				94.5957	0.681944	10527
	222.5				168.337	2.42427	3462
	272.5				227.164	11.9858	68
	322.5				288.007	29.8543	27
	372.5				357.258	70.0063	10
	177.5							93.065	0.789643	8390
	227.5							140.562	1.8677	4777
	277.5							111.772	6.15845	221
	327.5							107.778	6.41702	104
	377.5							101.492	6.11969	82
	427.5							93.751	6.52886	53
	477.5							113.339	10.1349	44
	1022.64							106.524	3.46306	519
	2900.3							115.81	6.11093	214
	4919.98							121.376	7.91938	106

## Sheet: BMK
Cell line:	BMK
						Transfection
		VBimL			VBimL-dCTS			VBimL-4E
	Venus Intensity	Mean AnnexinV Rhodamine Intensity	SEM	N	Mean AnnexinV Rhodamine Intensity	SEM	N	Mean AnnexinV Rhodamine Intensity	SEM	N
	167.5	55.2991	1.34137	1050
	217.5	143.906	3.72173	379
	267.5	198.777	8.15357	80
	317.5	235.603	22.644	16
	367.5	229.364	26.6845	10
	172.5				72.7369	1.86617	944
	222.5				163.599	5.32709	238
	272.5				164.822	15.7854	35
	322.5				180.656	48.3638	7
	372.5				248.844	88.6478	3
	177.5							41.2864	1.80169	750
	227.5							67.3996	3.84999	342
	277.5							54.8257	5.95775	144
	327.5							49.9341	6.57184	85
	377.5							43.775	6.7104	87
	427.5							37.4755	3.60737	104
	707.336							40.7204	2.72094	307
	1427.65							43.559	2.92009	288
	2878.53							46.8573	2.96519	247
	5035.98							54.5728	5.91862	94

## Sheet: HCT116
Cell line:	HCT116
						Transfection
		VBimL			VBimL-dCTS			VBimL-4E
	Venus Intensity	Mean AnnexinV Rhodamine Intensity	SEM	N	Mean AnnexinV Rhodamine Intensity	SEM	N	Mean AnnexinV Rhodamine Intensity	SEM	N
	167.5	30.6956	0.272197	228
	217.5	37.2953	0.133059	7689
	267.5	59.9969	0.635812	1268
	317.5	86.354	2.71732	100
	367.5	76.1072	9.25883	28
	417.5	73.3191	12.2451	13
	734.031	39.9433	2.03545	17
	1395.16	47.3838	7.85563	14
	2610.83	45.146	9.09569	5
	5211.69	44.0259	13.436	2
	172.5				29.8629	0.296204	102
	222.5				36.7056	0.11428	8183
	272.5				53.6666	0.537069	1448
	322.5				70.5914	1.34772	350
	372.5				75.2729	2.54368	147
	422.5				71.9136	3.02388	111
	647.034				58.143	3.39612	75
	1485.16				38.7314	2.92982	24
	2590.49				43.1803	3.71432	15
	5154.26				35.7871	2.42851	4
	177.5							31.9964	0.851475	120
	227.5							34.6834	0.114939	8988
	277.5							40.2166	0.520971	1259
	327.5							37.092	0.743871	439
	377.5							35.1699	0.581901	273
	427.5							35.4557	0.616645	340
	692.52							36.0846	0.566903	655
	1417.55							36.5476	0.886469	386
	2913.34							34.8195	0.456697	298
	5168.4							37.1983	1.26364	159

## Sheet: MEF
Cell line:	MEF
						Transfection
		VBimL			VBimL-dCTS			VBimL-4E
	Venus Intensity	Mean AnnexinV Rhodamine Intensity	SEM	N	Mean AnnexinV Rhodamine Intensity	SEM	N	Mean AnnexinV Rhodamine Intensity	SEM	N
	167.5	34.1355	0.675477	808
	217.5	51.8033	0.811311	2556
	267.5	140.424	5.47477	127
	317.5	138.556	10.9637	31
	367.5	174.389	38.6743	11
	417.5	186.97	22.923	10
	172.5				34.5191	0.678676	702
	222.5				51.2257	0.830672	2634
	272.5				119.071	7.13353	102
	322.5				134.965	28.5512	11
	177.5							35.0666	0.890541	503
	227.5							42.1427	0.703188	2512
	277.5							49.4682	3.21198	217
	327.5							49.6859	3.2982	97
	377.5							45.6508	4.99842	50
	427.5							56.2157	7.04041	53
	477.5							60.2155	10.6659	28
	983.697							67.7648	4.23615	225
