# Supplementary material for: The carboxyl-terminal sequence of bim enables bax activation and killing of unprimed cells
Source: eLife. 2020 Jan 24;9:e44525. doi: 10.7554/eLife.44525 (PMC6980855; doi:10.7554/eLife.44525)
Supplement: Figure 1—source data 1. [file elife-44525-fig1-data1.xlsx]

## Sheet: Figure 1A)
Figure 1 A)																			Analysis
																						HEK293										Cama-1											BMK
		HEK293			CAMA-1			BMK			HCT116			MEF
		Rep 1	Rep 2	Rep 3	Rep 1	Rep 2	Rep 3	Rep 1	Rep 2	Rep 3	Rep 1	Rep 2	Rep 3	Rep 1	Rep 2	Rep 3			Number of families	1									Number of families	1										Number of families	1
	VtBid	18.1672	14.958	16.4581	62.5	72.7273	71.4286	75.817	69.163	75.4386	86.8421	64	82.3529	57.2	84.7619	75.7085			Number of comparisons per family	6									Number of comparisons per family	6										Number of comparisons per family	6
	VBimL	55.1802	65.1206	63.2353	60	63.6364	65.7143	80.531	71.134	77.1242	82.8125	75	69.5652	78.6477	65.3465	62			Alpha	0.05									Alpha	0.05										Alpha	0.05
	VBimL-dCTS	1.8617	1.65517	2.98508	56	50	57.6923	67.8445	65.5689	68.3908	74.8344	71.1409	64.1892	75.7062	68.5535	74.7604
	VBimL-4E	0.865052	1.0395	2.35784	6.66667	4.61538	9.61538	17.6471	26.9966	22.2349	4.31372	6.56371	6.77083	19.2982	18.9781	19.3262			Tukey's multiple comparisons test	Mean Diff.	95.00% CI of diff.	Significant?	Summary	Adjusted P Value					Tukey's multiple comparisons test	Mean Diff.	95.00% CI of diff.	Significant?	Summary	Adjusted P Value						Tukey's multiple comparisons test	Mean Diff.	95.00% CI of diff.	Significant?	Summary	Adjusted P Value
																			VtBid vs. VBimL	-44.6	-51.92 to -37.28	Yes	****	<0.0001	A-B				VtBid vs. VBimL	5.767	-4.511 to 16.04	No	ns	0.341	A-B					VtBid vs. VBimL	-2.767	-12.95 to 7.412	No	ns	0.8199	A-B
		*Value in cells represents the percentage of Venus expressing cells that stain positive for AnnexinV																	VtBid vs. VBimL-dCTS	14.37	7.045 to 21.69	Yes	**	0.0011	A-C				VtBid vs. VBimL-dCTS	14.3	4.022 to 24.58	Yes	**	0.0091	A-C					VtBid vs. VBimL-dCTS	6.2	-3.978 to 16.38	No	ns	0.2813	A-C
																			VtBid vs. VBimL-4E	15.13	7.812 to 22.45	Yes	***	0.0008	A-D				VtBid vs. VBimL-4E	61.9	51.62 to 72.18	Yes	****	<0.0001	A-D					VtBid vs. VBimL-4E	51.2	41.02 to 61.38	Yes	****	<0.0001	A-D
																			VBimL vs. VBimL-dCTS	58.97	51.65 to 66.29	Yes	****	<0.0001	B-C				VBimL vs. VBimL-dCTS	8.533	-1.744 to 18.81	No	ns	0.1076	B-C					VBimL vs. VBimL-dCTS	8.967	-1.212 to 19.15	No	ns	0.0856	B-C
																			VBimL vs. VBimL-4E	59.73	52.41 to 67.05	Yes	****	<0.0001	B-D				VBimL vs. VBimL-4E	56.13	45.86 to 66.41	Yes	****	<0.0001	B-D					VBimL vs. VBimL-4E	53.97	43.79 to 64.15	Yes	****	<0.0001	B-D
																			VBimL-dCTS vs. VBimL-4E	0.7667	-6.555 to 8.088	No	ns	0.9861	C-D				VBimL-dCTS vs. VBimL-4E	47.6	37.32 to 57.88	Yes	****	<0.0001	C-D					VBimL-dCTS vs. VBimL-4E	45	34.82 to 55.18	Yes	****	<0.0001	C-D
																			Test details	Mean 1	Mean 2	Mean Diff.	SE of diff.	n1	n2	q	DF		Test details	Mean 1	Mean 2	Mean Diff.	SE of diff.	n1	n2	q	DF			Test details	Mean 1	Mean 2	Mean Diff.	SE of diff.	n1	n2	q	DF
																			VtBid vs. VBimL	16.57	61.17	-44.6	2.286	3	3	27.59	8		VtBid vs. VBimL	68.87	63.1	5.767	3.209	3	3	2.541	8			VtBid vs. VBimL	73.47	76.23	-2.767	3.178	3	3	1.231	8
																			VtBid vs. VBimL-dCTS	16.57	2.2	14.37	2.286	3	3	8.887	8		VtBid vs. VBimL-dCTS	68.87	54.57	14.3	3.209	3	3	6.301	8			VtBid vs. VBimL-dCTS	73.47	67.27	6.2	3.178	3	3	2.759	8
																			VtBid vs. VBimL-4E	16.57	1.433	15.13	2.286	3	3	9.361	8		VtBid vs. VBimL-4E	68.87	6.967	61.9	3.209	3	3	27.28	8			VtBid vs. VBimL-4E	73.47	22.27	51.2	3.178	3	3	22.78	8
																			VBimL vs. VBimL-dCTS	61.17	2.2	58.97	2.286	3	3	36.48	8		VBimL vs. VBimL-dCTS	63.1	54.57	8.533	3.209	3	3	3.76	8			VBimL vs. VBimL-dCTS	76.23	67.27	8.967	3.178	3	3	3.99	8
																			VBimL vs. VBimL-4E	61.17	1.433	59.73	2.286	3	3	36.95	8		VBimL vs. VBimL-4E	63.1	6.967	56.13	3.209	3	3	24.74	8			VBimL vs. VBimL-4E	76.23	22.27	53.97	3.178	3	3	24.01	8
																			VBimL-dCTS vs. VBimL-4E	2.2	1.433	0.7667	2.286	3	3	0.4743	8		VBimL-dCTS vs. VBimL-4E	54.57	6.967	47.6	3.209	3	3	20.98	8			VBimL-dCTS vs. VBimL-4E	67.27	22.27	45	3.178	3	3	20.02	8

## Sheet: Figure 1B)
Figure 1 B)
	Cytochrome c release BH3 Profiling
	*value in cells indicates % cytochrome c release
	Cell Line:	HEK293					Cell Line:	MEF
		Rep 1	Rep 2	Rep 3				Rep 1	Rep 2	Rep 3
	Untreated	5.0689	8.06113	5.74712			Untreated	26.2935	8.3811	18.4313
	cBid	21.1799	35.9963	20.0635			cBid	85.7429	88.9089	89.3326
	BimL	73.3593	55.7502	56.0838			BimL	92.6343	94.1419	92.8146
	BimL-dCTS	5.19172	19.8403	9.87026			BimL-dCTS	74.7161	86.6179	88.3844
	Bad	7.7573	16.9425	7.02943			Bad	80.3437	83.0864	81.8161
	Noxa	14.6115	13.7944	15.9769			Noxa	73.097	78.992	78.4103
	Bad+Noxa	3.43309	4.13892	15.1455			Bad+Noxa	79.7041	90.6767	90.9163

## Sheet: Figure 1B Calculations
Figure 1 B - Calculated source data HEK293																		Figure 1 B - Calculated source data MEF
		rep1					rep2					rep3								rep1					rep2					rep3
		Lane	Value	%Release	Group		Lane	Value	%Release	Group		Lane	Value	%Release	Group					Lane	Value	%Release	Group		Lane	Value	%Release	Group		Lane	Value	%Release	Group
		1	412.678	5.0689	Mito Alone		1	1128.77	8.06113	Mito Alone		1	3573.6	20.0635	cBid					1	18540.5	26.2935	Mito Alone		1	11478.9	8.3811	Mito Alone		1	9095.33	18.4313	Mito Alone
		2	7728.69				2	12873.9				2	14237.8							2	6614.01				2	1050.06				2	2055.18
		3	1756.55	21.1799	cBid		3	3683.43	35.9963	cBid		3	7336.03	56.0838	BimL					3	1545.31	92.6343	BimL		3	905.355	94.1419	BimL		3	1278.06	92.8146	BimL
		4	6536.91				4	6549.38				4	5744.45							4	19434.3				4	14549.5				4	16508.9
		5	8661.4	73.3593	BimL		5	5109.13	55.7502	BimL		5	685.477	9.87026	BimL-dCTS					5	6979.01	74.7161	BimL-dCTS		5	2176.6	86.6179	BimL-dCTS		5	2411.72	88.3844	BimL-dCTS
		6	3145.43				6	4055.2				6	6259.4							6	20623.6				6	14088.4				6	18351
		7	476.506	5.19172	BimL-dCTS		7	2365.43	19.8403	BimL-dCTS		7	1279.89	7.02943	Bad					7	3465.3	85.7429	cBid		7	2153.06	88.9089	cBid		7	2140.77	89.3326	cBid
		8	8701.69				8	9556.91				8	16927.7							8	20840.4				8	17259.4				8	17927.6
		9	860.648	7.7573	Bad		9	2095.6	16.9425	Bad		9	2325.77	15.9769	Noxa					9	4049.18	80.3437	Bad		9	2017.06	83.0864	Bad		9	4626.18	81.8161	Bad
		10	10234				10	10273.3				10	12231.3							10	16550.8				10	9908.62				10	20814.9
		11	551.092	14.6115	Noxa		11	1561.01	13.7944	Noxa		11	1681.84	15.1455	Bad + Noxa					11	7069.72	73.097	Noxa		11	2481.77	78.992	Noxa		11	5013.35	78.4103	Noxa
		12	3220.55				12	9755.28				12	9422.71							12	19208.9				12	9331.67				12	18207.7
		13	1560.55	3.43309	Bad + Noxa		13	1612.06	4.13892	Bad + Noxa		13	723.305	5.74712	Mito Alone					13	3989.48	79.7041	Bad + Noxa		13	989.598	90.6767	Bad + Noxa		13	1194.06	90.9163	Bad + Noxa
		14	43895.6				14	37336.8				14	11862.2							14	15667.1				14	9624.62				14	11951
