# Supplementary material for: The carboxyl-terminal sequence of bim enables bax activation and killing of unprimed cells
Source: eLife. 2020 Jan 24;9:e44525. doi: 10.7554/eLife.44525 (PMC6980855; doi:10.7554/eLife.44525)
Supplement: Figure 2—source data 1. [file elife-44525-fig2-data1.xlsx]

## Sheet: Figure 2B)
Figure 2B
												Analysis
			vtBid	vBimL	vBimL-dCTS	vBimL-4E						Dunnett's multiple comparisons test	Mean Diff.	95.00% CI of diff.	Significant?	Summary	Adjusted P Value
		rep 1	89.4118	79.1667	35	18.3976
		rep 2	87.5	76.5766	20.8333	21.1009						vBimL vs. vtBid	-3.935	-21.91 to 14.04	No	ns	0.8635
		rep 3	69.1176	78.481	38.0503	11.9565						vBimL vs. vBimL-dCTS	46.78	28.8 to 64.76	Yes	**	0.0002
												vBimL vs. vBimL-4E	60.92	42.95 to 78.9	Yes	**	<0.0001
	*Value in cells represents the percentage of Venus expressing neurons that stain negative for TMRE
												Test details	Mean 1	Mean 2	Mean Diff.	SE of diff.	n1
												vBimL vs. vtBid	78.07	82.01	-3.935	6.243	3
												vBimL vs. vBimL-dCTS	78.07	31.29	46.78	6.243	3
												vBimL vs. vBimL-4E	78.07	17.15	60.92	6.243	3

## Sheet: Figure 2C)
Figure 2C
			BimL			BimL-dCTS
		Untreated	0.1nM	1nM	10nM	0.1nM	1nM	10nM
	rep 2	47.6608	82.9638	97.7663	91.1891	37.4559	62.1062	25.7211
	rep 1	3.62035	33.6427	78.3077	86.1484	6.03007	7.7303	13.9537
	rep 3	9.419	93.0695	87.6877	88.009	16.4037	16.2561	6.4081
			*Value in Cells indicates % of total Cytochrome c released

## Sheet: Figure 2C Calculations
	Rep 2						Rep 1						Rep 3
	Lane	Density Value	%Release	Group			Lane	Density Value	%Release	Group			Lane	Density Value	%Release	Group
	1	4033.18	47.6608	Mito Alone			1	16193.5	3.62035	Mito Alone			1	38379.4	9.419	Mito Alone
	2	3672.66			Bim		2	608.284			Bim		2	3990.85			Bim
	3	2005.5	82.9638	0.1nM			3	7715.2	33.6427	0.1nM			3	316.042	93.0695	0.1nM
	4	9766.49					4	3911.55					4	4244.12
	5	358.77	97.7663	1nM			5	4090.55	78.3077	1nM			5	1132.95	87.6877	1nM
	6	15702.7					6	14766.6					6	8068.88
	7	589.134	91.1891	10nM			7	1970.74	86.1484	10nM			7	1374.57	88.009	10nM
	8	6097.3					8	12256.7					8	10088.8
	9	7420.54	37.4559	0.1nM	BimL-dCTS		9	13885.9	6.03007	0.1nM	BimL-dCTS		9	8773.85	16.4037	0.1nM	BimL-dCTS
	10	4443.95					10	891.062					10	1721.65
	11	6974.43	62.1062	1nM			11	33244.4	7.7303	1nM			11	6683.95	16.2561	1nM
	12	11430.8					12	2785.19					12	1297.47
	13	8002.83	25.7211	10nM			13	42869.2	13.9537	10nM			13	7549.74	6.4081	10nM
	14	2771.2					14	6951.91					14	516.92
