# Supplementary material for: The carboxyl-terminal sequence of bim enables bax activation and killing of unprimed cells
Source: eLife. 2020 Jan 24;9:e44525. doi: 10.7554/eLife.44525 (PMC6980855; doi:10.7554/eLife.44525)
Supplement: Figure 3—source data 1. [file elife-44525-fig3-data1.xlsx]

## Sheet: A)
	Figure 3
		A) Bax activation by BimL at liposomes
			BimL						BimL-dCTS			BimL-4E
		Concentration of Bim protein added (nM)	Rep 1	Rep 2	Rep 3	Rep 4	Rep 5	Rep 6	Rep 1	Rep 2	Rep 3	Rep 1	Rep 2	Rep 3
		0	12.8093	14.1325	12.6783	14.5445	15.1069	15.2055	12.8093	14.1325	12.6783
		0.1	45.5082	43.2198	41.6728	34.554	36.0279	33.583	15.8474	14.5865	5.95289
		0.25	61.343	60.7082	57.2032	50.3857	48.4004	46.0035	13.4102	13.0885	4.27634
		0.5	71.2314	74.901	79.4589	60.7702	59.8064	59.394	12.8636	14.2608	3.91612
		1	90.5373	89.9247	91.0704	84.4821	83.3325	84.3448	13.0882	13.4741	6.89745
		2	94.3538	94.9834	96.2458	91.4796	92.1937	90.0707	13.4615	14.1555	5.68967
		5	96.7869	97.0032	96.4573	94.105	96.5984	93.9889	15.4648	14.6379	7.59406	5.7818	9.03754	8.93271
		10				96.6555	97.2819	94.6326	13.4615	14.1555	5.68967	6.76916	8.797	13.496
		20				97.5139	95.5762	98.7561	15.4648	14.6379	7.59406
		25							19.8335	16.1699
		50							25.8673	25.002		6.29474	9.57448	24.9114
		100							26.5163	29.2142		5.82629	10.4121	9.54653
		200							38.9013	32.5786		6.10707	12.8921	12.8744
		400							50.6142	51.3901		6.08504	14.6186	14.9567
		500							59.2219	54.7532		7.29014	17.8844	17.1849
		1000							58.4586	62.6925		8.11115	16.6847	15.4356
		2500							51.3733	53.4818
			*Value in cell indicates ANTS Release (%)

## Sheet: B)
	Figure 3
		B) Bax activation by BimL at mitochondria
			BimL			BimL-dCTS
		Concentration of Bim protein added (nM)	Rep 1	Rep 2	Rep 3	Rep 1	Rep 2	Rep 3
		0	8.10811	14.375	15.6863
		0.25	21.7391	24.498	18.7943
		0.5	37.1901	47.4178	17.5439
		1	56.7164	71.7131	51.9573
		2	55.1852	72.1312	66.4179
		4	61.7761	80.303	70.2899
		6	62.6812	79.2373	67.5
		8	66.4151	73.5178	70
		0				14.375	8.10811	15.6863
		0.25				7.6555	16.7442	18.9055
		0.5				9.17431	13.5021	12.4481
		1				17.4528	10.1167	12.8405
		2				14.7186	12.1739	13.6929
		4				13.4328	11.5702	14.4628
		6				14.7368	16.8831	17.4274
		8				14.8325	15.4545	14.7727
		62.5				17.4242	15.6522	32.8829
		125				25	20.4918	28.692
		250				20.1492	31.7073	46.6667
		500				26.8966	25	45.6522
		1000				42.9825	42.4	48.8189
		2000				50.4348	38.0165	51.2712
			*Value in cell indicates SMAC-mCherry Release (%)

## Sheet: C)
	Figure 3
												Analysis
		C) BimL Bax binding in solution
													BimL	BimL-dCTS
			BimL				BimL-dCTS					One site -- Specific binding with Hill slope		Interrupted
		Concentration of Alexa 647 labelled Bax added (nM)	Rep 1	Rep 2	Rep 3	Rep 4	Rep 1	Rep 2	Rep 3			Best-fit values
		0	-21.2073	-3.51673	13.221	2.68297						Bmax	64.33	37426
		2	1.9707	5.17729	5.04046	-2.78901						h	1.576	0.2657
		4	-3.23079	4.52233	10.4297	-4.53927						Kd	58.89	1.717e+18
		10	3.81782		7.635	1.38255						Std. Error
		20	10.3139	13.4953	9.18336	13.137						Bmax	2.627
		40	25.4392	20.2841	25.8699	12.2045						h	0.2133
		100	46.0409	40.5351	51.7356	39.7189						Kd	6.608
		200	55.3755	54.8156	60.6646	62.4037						95% CI (asymptotic)
		400	57.9203	60.8111	62.4711	62.3174						Bmax	59.01 to 69.66
		1000	61.8299	63.5754	62.7026	62.7026						h	1.144 to 2.009
		0					-0.55537	-2.39333	-1.12092			Kd	45.48 to 72.29
		1					3.61443	2.05855	3.37211			Goodness of Fit
		2.5					3.04038	2.82745	0.941133			Degrees of Freedom	36
		5					-1.86083	-0.26984	-0.75974			R square	0.9554
		10					-0.48287	0.745065	0.82924			Absolute Sum of Squares	1205
		20					4.18705	1.71404	1.53856			Sy.x	5.786
		40					0.731381	0.284029	-1.91481
		80					1.03427	-0.34181	0.742225
		160					2.72794	3.31726	3.00207
		320					3.59093	0.989821	0.469388
		640					3.33684	4.83834	2.5756
		1000					3.69462	4.05839	3.10147
			*Value in cell FRET effciency(%) between Alexa 568 (donor) labelled BimL and Alexa 647 (acceptor) labelled Bax

## Sheet: D)
	Figure 3											Analysis
		D) BimL Bax binding on Liposomes											BimL	BimL-dCTS
												One site -- Specific binding with Hill slope		Interrupted
			BimL			BimL-dCTS						Best-fit values
		Concentration of Alexa 647 labelled Bax added (nM)	Rep 1	Rep 2	Rep 3	Rep 1	Rep 2	Rep 3				Bmax	76.77	156343
		0	1.95647	0.868504	1.90971	0.489572	1.11964	0.19373				h	1.648	0.4159
		1	5.21225	5.17522	3.18095	-0.79567	-1.80835	-0.44716				Kd	29.18	138600000000000
		2.5	0.522947	0.912901	1.83572	1.19393	0.820461	-1.10071				Std. Error
		5	8.79442	6.32695	8.71791	-0.49782	3.0619	1.18041				Bmax	0.8752
		10	12.2756	12.2545	11.7913	-2.17875	-0.63312	0.927105				h	0.08039
		20	22.3487	24.5034	24.7378	0.382705	1.33618	0.680389				Kd	1.026
		40	48.0493	47.5337	49.9461	1.96734	2.24287	3.18443				95% CI (asymptotic)
		80	66.792	66.7984	66.7906	4.05273	3.14294	1.92471				Bmax	74.99 to 78.55
		160	71.7919	72.0545	72.2492	0.044429	0.695547	1.53074				h	1.484 to 1.811
		320	74.8588	75.1372	72.3927	3.11341	0.563807	1.01927				Kd	27.09 to 31.27
		640	77.5272	76.8702	76.1226	-1.63272	0.847223	2.96706				Goodness of Fit
		1000		75.2472	76.3377	4.31473	7.27314	4.94269				Degrees of Freedom	32
												R square	0.9947
												Absolute Sum of Squares	180.7
		*Value in cell FRET effciency(%) between Alexa 568 (donor) labelled BimL and Alexa 647 (acceptor) labelled Bax										Sy.x	2.377
