# Supplementary material for: The carboxyl-terminal sequence of bim enables bax activation and killing of unprimed cells
Source: eLife. 2020 Jan 24;9:e44525. doi: 10.7554/eLife.44525 (PMC6980855; doi:10.7554/eLife.44525)
Supplement: Figure 4—source data 1. [file elife-44525-fig4-data1.xlsx]

## Sheet: A)
	Figure 4
															Analysis
		A) BimL binding to liposomes														BimL	BimL-dCTS
															Kd fitting advanced		Ambiguous
			BimL					BimL-dCTS							Best-fit values
		Concentration of liposomes added (nM)	Rep 1	Rep 2	Rep 3	Rep 4	Rep 5	Rep 1	Rep 2	Rep 3					Bmax	56.79	~ 55.09
		0	7.42441	4.13386	0.386329	4.31475	5.92006								A	-0.02001	~ 20
		0.007266	19.5769	15.6044	19.8114	17.4519									Kd	0.03941	~ 1015
		0.014532	21.371	17.1855	18.5517	5.20284	25.5163								Std. Error
		0.029064	27.4032	28.5809	28.4264	18.2819									Bmax	1.445	~ 700.6
		0.058129	34.9098	34.7691	35.0795	23.3469	50.8698								A	0.02017
		0.116258	40.2814	43.2043	42.014	39.8537	57.3123								Kd	0.01216	~ 153973
		0.232516	47.0703	46.766	48.8389	46.8072	62.016								95% CI (asymptotic)
		0.465031	54.5342	51.2457	54.0085	48.993	63.3722								Bmax	53.9 to 59.69	(Very wide)
		0.930062	54.3061	53.8409	56.646	54.8257	62.6334								A	-0.06041 to 0.0204
		1.86012	55.4524	56.4232	54.5585	55.8545	62.6951								Kd	0.01505 to 0.06377	(Very wide)
		3.72025	55.5795	53.3038	54.4783	54.9491	63.8823								Goodness of Fit
		7.4405	48.719	44.5082	44.8087	54.5925	59.931								Degrees of Freedom	56	26
															R square	0.8959	0.7417
		0						-4.22721	-4.64942	-2.86927					Absolute Sum of Squares	2080	828.6
		0.014881						-0.8027	-5.78107	-7.14521					Sy.x	6.094	5.645
		0.0372024						-1.65647	-4.97892	-3.97975					Constraints
		0.0744048						1.12715							A	A < 20	A < 20
		0.14881						-8.04774	-9.20752	-9.86404
		0.297619						-4.45409	-5.65038	-0.40917
		0.595238							-7.48014	-4.98834
		1.19048						-7.80321	-7.22142	-1.54136
		2.38095						-8.1343	-8.05805	1.23327
		4.7619						0.06247	-3.36219	-0.98962
		*Value in cell indicates FRET efficiency (%) between Alexa 568 (Donor) labelled Bim and DiD (acceptor) labelled liposomes

## Sheet: B)
	Figure 4
															Analysis
		B) BimL binding to mitochondria														BimL	BimL-dCTS
															Kd fitting advanced
			BimL					BimL-dCTS							Best-fit values
		Concentration of mitochondria added (μg/mL)	Rep 1	Rep 2	Rep 3	Rep 4	Rep 5	Rep 1	Rep 2	Rep 3					Bmax	58.91	24656
		0	-1.92608	-4.25057	0.815725	4.53462	-9.04549	0.518644	0.981036	5.17432					A	= 4	= 4
		15	7.45012	9.69487	10.7185	9.03339	1.7161	-0.5042	2.84632	-0.23648					Kd	115.7	56560804
		30	20.7641	16.0428	19.3626	11.4874	3.24493	-6.33233	0.139814	0.978789					Std. Error
		60	22.6023	18.2711	25.0842	11.723	16.8454	2.86932	-2.06885	-1.46423					Bmax	1.819	137706
		125	29.4703	29.1105	34.114	31.2548	25.6008	0.599368	1.49355	1.49178					A	12.8	321702307
		250	38.488	42.4501	38.7661	40.4748	36.8715	1.57139	-0.91701	-3.09589					Kd
		500	50.0985	48.4774	47.79	47.0666	45.6307	-3.35477	0.017987	-0.74965					95% CI (asymptotic)	55.24 to 62.59	-260929 to 310241
		1000	54.1673	55.4132	56.0673	51.8768	41.937	-1.78436	-0.81499						Bmax	89.83 to 141.5	-610608947 to 723730554
		1800	58.6712	58.9328	54.9156										A
		10000													Kd	41	22
															Goodness of Fit	0.9548	0.1294
		*Value in cell indicates FRET efficiency (%) between Alexa 568 (Donor) labelled Bim and DiD (acceptor) labelled mitochondria													Degrees of Freedom	755.2	130.8
															R square	4.292	2.439
															Absolute Sum of Squares
															Sy.x	A = 4	A = 4
															Constraints

## Sheet: C)
		Figure 4
													Analysis
		C) BimL - Bax binding at mitochondria												BimL	BimL-dCTS
													Kd fitting advanced
			BimL			BimL-dCTS							Best-fit values
		Concentration of Alexa 647 labelled Bax added (nM)	Rep 1	Rep 2	Rep 3	Rep 1	Rep 2	Rep 3					Bmax	58.28	0.6223
		0	3.13383	-0.8384	1.09115	-1.95093	-1.33561	-0.68118					A	= 4	= 4
		0.5	-1.19534	2.60396	-0.76029	-0.08383	2.02581	-0.41876					Kd	274.9	5.751
		1	-2.88431	-1.95911	1.96969	-0.26258	-0.28948	3.38062					Std. Error
		2.5	7.03246	0.986427	3.5881	-3.52058	2.3169	-1.2121					Bmax	2.769	0.8988
		5	3.55254	-3.05675	-0.75382	-2.99259	-3.23273	-5.57342					Kd	36.84	53.41
		10	-4.28978	-6.04854	-1.20328	4.5956	2.09526	-0.98498					95% CI (asymptotic)
		25	0.145668	-3.61495	5.58176	1.88057	4.8038	3.73397					Bmax	52.67 to 63.9	-1.204 to 2.449
		50	7.24262	9.39355	8.77562	-0.99623	2.13033	1.26396					Kd	200.2 to 349.6	-102.8 to 114.3
		100	15.6833	12.0607	17.7566	2.01942	-2.64626	3.6595					Goodness of Fit
		200	21.2235	22.7308	23.452	1.66141	1.28812	0.259029					Degrees of Freedom	36	34
		400	36.7753	37.1591	39.5652	-5.11548	-2.97516	-3.27654					R square	0.962	0.01789
		800	42.8773	47.4165	45.8125	-3.46108	5.6303	4.81405					Absolute Sum of Squares	449	300.7
													Sy.x	3.531	2.974
		*Value in cell indicates FRET efficiency (%) between Alexa 568 (Donor) labelled Bim and Alexa 647 (acceptor) labelled Bax											Constraints
													A	A = 4	A = 4
