# Supplementary material for: The carboxyl-terminal sequence of bim enables bax activation and killing of unprimed cells
Source: eLife. 2020 Jan 24;9:e44525. doi: 10.7554/eLife.44525 (PMC6980855; doi:10.7554/eLife.44525)
Supplement: Figure 5—source data 1. [file elife-44525-fig5-data1.xlsx]

## Sheet: A)
	Figure 5
		A) Mode 1 inhibition of Bcl-XL
			BimL-dCTS					Bad
		Concentration of BH3-only protein added (nM)	Rep 1	Rep 2	Rep 3	Rep 4	Rep 5	Rep 1	Rep 2	Rep 3	Rep4	Rep 5
		0	6.76712	12.5465	12.6542	12.9528	12.0406
		12.5	12.9761	8.99454	15.0608	20.6657	18.0027	9.0725	12.9714	15.3825	17.4414	15.4475
		25	19.0587	20.2437	16.6593	23.5234	22.6047	13.9843	22.9364	17.308	22.6176	19.7836
		50	38.3161	41.9317	37.3071	45.1356	39.2609	47.961	49.176	56.2153	67.989	55.5797
		100	54.2057	55.7553	54.0154	62.9281	57.0167	65.5709	70.3663	61.8472	80.9402	75.9215
		200	60.4877	51.5068	53.7474	65.1945	63.9404	65.284	61.9503	64.0458	82.079	79.1741
		*Value in cell indicates ANTS Release (%)
		*Value in cell indicates FRET efficiency (%) between Alexa 568 (Donor) labelled Bim and DiD (acceptor) labelled liposomes

## Sheet: B)
	Figure 5
		B) Mode 2 inhibition of Bcl-XL
			BimL-dCTS			Bad
		Concentration of BH3-only protein added (nM)	Rep 1	Rep 2	Rep 3	Rep 1	Rep 2	Rep 3
		0	12.2198	11.554	10.4134	12.2198	11.554	10.4134
		12.5	16.3439	15.2896	13.965	11.9623	10.8307	11.6191
		25	19.6658	18.5689	16.2514	7.25912	14.0374	11.9917
		50	28.1914	28.3416	24.2785	13.1525	13.0746	12.3934
		100	49.3865	45.8314	43.8972	40.2884	33.3597	33.7925
		200	63.52	60.4475	54.6658
		*Value in cell indicates ANTS Release (%)

## Sheet: C)
	Figure 5
		C) Inhibition of Bcl-XL at mitochondria
				1			2		3
			Alexa 568 labelled cBid and Alexa 647 labelled Bcl-XL FRET efficiency			Cytochrome c release (%)			BimL-dCTS + Bax control (Cytochrome c release (%))
		Concentration of BimL-dCTS added (nM)	Rep 1	Rep 2	Rep 3	Rep 1	Rep 2	Rep 3	Rep 1	Rep 2
		0	50.6833	52.9098	44.0388	20.7778			20.7778
		2.5	53.0122	52.8671	52.0366	34.4026	32.3499	31.3925
		5	52.7171	52.3977	53.0704	37.5239	33.3307	33.4416
		10	54.7935	52.7542	54.282	34.0209	33.4932	34.2408
		20	54.916	54.3809	53.6306	40.3772	43.8732	36.414
		50	53.341	51.2813	52.1022	38.8706	41.2175	49.7037
		100	50.3744	48.9442	49.5517	47.8043	42.2562	48.86
		200	47.943	45.7852	48.0138	50.3861	60.4203	57.8511
		400	40.4308	37.9283	38.6432	55.2579	66.1217	65.7888
		800	29.0968	29.62	31.5691	72.6973	80.4112	74.5597
		500							37.3857	32.5786
		1000							39.3559	38.9013
