# Supplementary material for: The carboxyl-terminal sequence of bim enables bax activation and killing of unprimed cells
Source: eLife. 2020 Jan 24;9:e44525. doi: 10.7554/eLife.44525 (PMC6980855; doi:10.7554/eLife.44525)
Supplement: Figure 6—figure supplement 1—source data 1. [file elife-44525-fig6-figsupp1-data1.xlsx]

## Sheet: A)
Figure 6 - Figure supplement 1
	A) BimL binding to membranes
																																Analysis
		BimL				BimL-V124E			BimL-I125E				BimL-L129E				BimL-I132E				BimL-CTS2A			BimL-4E			BimL-dCTS
	Liposome Concentration [nM]	Rep 1	Rep 2	Rep 3	Rep 4	Rep 1	Rep 2	Rep 3	Rep 1	Rep 2	Rep 3	Rep 4	Rep 1	Rep 2	Rep 3	Rep 4	Rep 1	Rep 2	Rep 3	Rep 4	Rep 1	Rep 2	Rep 3	Rep 1	Rep 2	Rep 3	Rep 1	Rep 2	Rep 3				BimL	BimL-V124E	BimL-I125E	BimL-L129E	BimL-I132E	Biml-CTS2A	BimL-dCTS	BimL-4E
	0	7.42441	4.13386	0.386329	4.31475	3.82113	-3.66743	12.5818	-2.54944	-5.44772	10.6433	-12.8161	-6.74655	8.97416	-4.00196	-4.62864	-9.69816	4.53107	4.06493	1.71465	7.41552	25.1444	8.58381	7.55212	-0.17785	19.2827						One site -- Specific binding with Hill slope					Ambiguous		Ambiguous
	0.007266	19.5769	15.6044	19.8114	17.4519	13.0667	3.23686	7.55968	-24.5307	-23.1987	10.3342	5.21882	-0.05739	7.46392	-14.4624	-18.8048	-1.20445	3.65348	-13.4986	-16.2281				22.1803	17.4518	38.8572						Best-fit values
	0.014532	21.371	17.1855	18.5517	5.20284	3.15268	-0.75466	7.85244	-9.09583	-7.38955		0.320569	-6.31287	6.90256	-5.52061	-3.65036	-0.01315	7.05649	-6.34305	-5.79697	5.0558	3.19298	5.05015	32.9197	15.4711	31.9855						Bmax	55.14	51	78.44	102.5	~ 496.7	49.15	50	50.65
	0.029064	27.4032	28.5809	28.4264	18.2819	6.2863	-1.9045	8.25441	7.45175	9.7164	7.38695	2.57585	-0.20795	-9.35472	-0.32825	0.527074	-11.5516	0.52339	6.43166	4.12464	-2.73616	1.87217		13.1067	14.4543							h	0.8421	1.048	0.388	0.4394	0.3385	0.8814	~ 3.329	0.7767
	0.058129	34.9098	34.7691	35.0795	23.3469	14.8164	5.29381	7.8473	3.46432	-1.14549	7.88709	-2.39459	-9.9346	1.63379	6.24232	10.0795	-2.0389	10.2989	2.01103	-1.81018	5.07512	9.35617		57.3413	53.5759	41.3861						Kd	0.03183	0.2604	254	1130	~ 652566	0.5879	~ 182	0.01133
	0.116258	40.2814	43.2043	42.014	39.8537	18.1064	8.93405	14.9272	1.7905	1.93728	1.90856	5.69231	-9.96881	7.49496	-0.39306	0.999115	4.42591	11.0687	7.75433	6.19963	5.16373	6.74894	20.0982	43.9395	44.3305	34.7505						Std. Error
	0.232516	47.0703	46.766	48.8389	46.8072	26.7973	20.3602	25.5917	3.9416	5.37967	11.0392	13.1425	-0.46205	3.1594	9.32052	8.74901	5.28756	3.8985	3.19226	3.12036	13.257	8.63001	17.2532	47.7916	47.557	51.4547						Bmax	1.576	3.182	56.54	181.5	~ 6161	4.219	5.791	5.57
	0.465031	54.5342	51.2457	54.0085	48.993	33.1676	16.8843	38.177	7.38851	5.01264	10.3029		2.18605	3.8731	8.29804	11.2131	2.10978	11.869	4.20097	4.97412	21.128	24.6909	26.4805	53.8447	54.0714	52.1527						h	0.09895	0.177	0.1567	0.2525	0.1899	0.1723	~ 3900	0.402
	0.930062	54.3061	53.8409	56.646	54.8257	46.3693	42.1916	46.4397	8.07967	6.12007	12.5201	12.2009	2.93686	5.74264	8.52537	9.05543	-1.9536	7.25016	12.4881	11.1899	25.4636	25.4261	33.7001	48.1341	50.1729	46.3383						Kd	0.004229	0.05556	1040	8829	~ 28870391	0.1811	~ 127610	0.005187
	1.86012	55.4524	56.4232	54.5585	55.8545	49.0491	41.6214	46.4912	8.58573	11.7116	14.3794	16.162	0.804706	11.8932	6.87411	9.45523	0.282541	7.01847	12.14	10.4588	34.4983	31.0984	36.8653	53.2148	38.5246	39.6375						95% CI (asymptotic)
	3.72025	55.5795	53.3038	54.4783	54.9491	50.6355	47.1801	50.1919	8.66843	10.231	17.6064	13.6933	-2.20324	4.90093	11.0194	10.8376	1.24279	3.86119	9.25666	12.1195	43.6581	39.2003	46.7082									Bmax	51.96 to 58.31	44.52 to 57.47	-35.52 to 192.4	-262.8 to 467.7	(Very wide)	40.54 to 57.77	38.1 to 61.9	39.2 to 62.1
	7.4405	48.719	44.5082	44.8087	54.5925	47.7014	46.5582	45.0974	13.6969	17.8478	14.8702	4.58332	-5.43119	6.3285	17.0814	17.4732	-6.39743	8.72679	16.4353	17.1608	44.7312	45.5988	46.09									h	0.6428 to 1.041	0.6875 to 1.408	0.07222 to 0.7038	-0.06876 to 0.9476	-0.04373 to 0.7207	0.5295 to 1.233	(Very wide)	-0.04953 to 1.603
																																Kd	0.02332 to 0.04035	0.1473 to 0.3734	-1841 to 2349	-16641 to 18902	(Very wide)	0.2181 to 0.9577	(Very wide)	0.0006701 to 0.02199
	0																										-4.22721	-4.64942	-2.86927			Goodness of Fit
	0.014881																										-0.8027	-5.78107	-7.14521			Degrees of Freedom	45	33	44	46	46	30	26	26
	0.0372024																										-1.65647	-4.97892	-3.97975			R square	0.9327	0.9162	0.576	0.5581	0.5765	0.8596	0.7452	0.6309
	0.0744048																										1.12715					Absolute Sum of Squares	975.7	1030	2490	2265	1967	1183	817.4	2755
	0.14881																										-8.04774	-9.20752	-9.86404			Sy.x	4.656	5.587	7.522	7.016	6.54	6.281	5.607	10.29
	0.297619																										-4.45409	-5.65038	-0.40917
	0.595238																											-7.48014	-4.98834
	1.19048																										-7.80321	-7.22142	-1.54136
	2.38095																										-8.1343	-8.05805	1.23327
	4.7619																										0.06247	-3.36219	-0.98962
			*Value in each cell represents % FRET efficiency between Alexa 568 labelled BimL protein and DiD labelled liposomes.

## Sheet: B)
	B) BimL - Bax binding in solution
																																		Analysis
		BimL				BimL-V124E				BimL-I125E				BimL-L129E				BimL-I132E				BimL-CTS2A				BimL-4E			BimL-dCTS						BimL	BimL-V124E	BimL-I125E	BimL-L129E	BimL-I132E	Biml-CTS2A	BimL-dCTS	BimL-4E
	Alexa 647 labelled Bax concentration [nM]	Rep 1	Rep 2	Rep 3	Rep 4	Rep 1	Rep 2	Rep 3	Rep 4	Rep 1	Rep 2	Rep 3	Rep 4	Rep 1	Rep 2	Rep 3	Rep 4	Rep 1	Rep 2	Rep 3	Rep 4	Rep 1	Rep 2	Rep 3	Rep 4	Rep 1	Rep 2	Rep 3	Rep 1	Rep 2	Rep 3			One site -- Specific binding with Hill slope							Interrupted	Ambiguous
	0	-21.2073	-3.51673	13.221	2.68297	-3.40769	0.966603	-3.74372	-0.4031	-5.8224	-4.24731	2.16818	2.20478	0.832832	-4.83116	2.2182	-0.36133	-0.7796	2.45926	-0.12882	2.89864													Best-fit values
	2	1.9707	5.17729	5.04046	-2.78901	-5.11777	-7.91643	0.605953	-6.19324	4.42119	-2.34651	-9.67702	-4.20286	1.34032	-0.64673	2.96012	-3.58952	1.63885	-4.19772	4.95712	-2.61967													Bmax	64.33	66.23	28.5	30.09	26.6	62.03	37426	40
	4	-3.23079	4.52233	10.4297	-4.53927	8.05326	2.6154	-2.71412	4.36768	-14.5235	-4.93922	5.8935	13.9732	1.32493	-2.40768	-5.27673	3.27779	-2.22838	0.130736	-2.61994	4.22384													h	1.576	1.147	6.368	1.873	2.576	2.67	0.2657	~ 32.56
	10	3.81782		7.635	1.38255	5.81582	4.25297	5.34302	5.20927	-2.93955	-9.24302	5.06618	2.70189	-2.54893	-3.31785	3.94454	0.416111	1.99124	0.993973	-7.89329	3.00903													Kd	58.89	124.9	44.63	73.14	47.02	39.56	1.717e+18	~ 74893
	20	10.3139	13.4953	9.18336	13.137	3.69253	1.87905	8.6518	5.00876	-1.51859	4.40924	2.06516	7.59174	-8.63755	-5.59978	0.87912	2.38603	3.70086	2.05536	3.48039	2.65382													Std. Error
	40	25.4392	20.2841	25.8699	12.2045	21.79	20.643	10.6356	10.5348	7.45653	5.57818	12.7414	11.5682	3.55836	10.1714	8.71212	15.1978	7.20534	8.60578	14.3984	11.4362													Bmax	2.627	2.098	1.809	1.768	1.105	1.689		4.131
	100	46.0409	40.5351	51.7356	39.7189	27.3612	29.1588	29.6837	30.1822	24.5578	31.7912	33.2645	32.9802	12.3757	20.9456	23.0462	29.6789	17.9568	29.1298	22.9011	25.3803													h	0.2133	0.09174	18.78	0.4324	0.6419	0.4567		~
	200	55.3755	54.8156	60.6646	62.4037	37.9558	37.6315	45.5237	39.9444	20.4839	26.104	29.1856	31.9135	14.9498	20.8134	25.8847	27.812	18.9956	27.1846	22.9793	29.0319													Kd	6.608	11.84	15.14	11.79	5.432	2.707		~
	400	57.9203	60.8111	62.4711	62.3174	54.6959	51.076	53.9262	52.9264	13.5362	25.1751	34.1137	36.8482	25.6231	28.5933	27.0053	29.6567	18.6925	25.3797	28.0737	29.4312													95% CI (asymptotic)
	1000	61.8299	63.5754	62.7026	62.7026	60.9176	61.384	62.7554	63.4294	18.5781	25.0431	36.2642	35.6044	22.9503	31.7276	33.6093	31.6787	18.5598	27.6091	29.5599	31.8583													Bmax	59.01 to 69.66	62 to 70.47	24.83 to 32.16	26.51 to 33.67	24.37 to 28.84	58.66 to 65.4		31.6 to 48.41
	2000					62.8517	63.4243	61.056	62.1087							35.0283	36.2627			32.8384	27.2811													h	1.144 to 2.009	0.9622 to 1.333	-31.69 to 44.42	0.9985 to 2.748	1.277 to 3.874	1.759 to 3.582		(Very wide)
																																		Kd	45.48 to 72.29	101 to 148.8	13.95 to 75.3	49.3 to 96.99	36.04 to 58.01	34.16 to 44.97		(Very wide)
	0																												-0.55537	-2.39333	-1.12092			Goodness of Fit
	1																												3.61443	2.05855	3.37211			Degrees of Freedom	36	41	37	39	39	67		33
	2.5																												3.04038	2.82745	0.941133			R square	0.9554	0.9809	0.822	0.8913	0.9148	0.9208		0.7043
	5																												-1.86083	-0.26984	-0.75974			Absolute Sum of Squares	1205	523.5	1616	888	558.8	3796		1126
	10																												-0.48287	0.745065	0.82924			Sy.x	5.786	3.573	6.608	4.772	3.785	7.527		5.841
	20																												4.18705	1.71404	1.53856
	40																												0.731381	0.284029	-1.91481
	80																												1.03427	-0.34181	0.742225
	160																												2.72794	3.31726	3.00207
	320																												3.59093	0.989821	0.469388
	640																												3.33684	4.83834	2.5756
	1000																												3.69462	4.05839	3.10147
	0																					8.02541	-2.83407	16.8171	-1.78061
	2																					-0.36432	16.862	15.9035	-5.23318
	4																					10.5945	0.766417	0.752748	1.76163
	10																					16.627	4.20205	21.9019	7.8673
	20																					11.2938	6.27111	14.8032	8.13325
	40																					30.2495	23.3042	33.2811	30.4865
	100																					60.081	62.2702	60.3108	58.1953
	200																					62.2303	66.6216	62.5592	62.3134
	400																					58.2759	61.4637	62.0294	62.7076
	1000																					52.0206	49.1917	53.2249	65.5198
	0																									4.55605	4.12302	5.49348
	1																									-1.56953	-1.81925	-1.62907
	2																									-5.3364	-0.64963	-4.41299
	5																									9.03806	1.01661	3.09391
	10																									14.3023	5.85431	12.4696
	20																									-6.06709	-1.07135	0.213128
	50																									8.15094	4.28245	7.80273
	100																									-3.79981	3.59646	3.57658
	200																									-3.00788	5.61297	11.8075
	500																									-7.73157	-0.29076	-0.77458
	1000																									-0.43138	-6.01907	-3.73968
				*Value in each cell represents % FRET efficiency between Alexa 568 labelled BimL protein and Alexa 647 labelled Bax

## Sheet: C)
	B) BimL - Bax binding on liposomes
																									Analysis
		BimL			BimL-V124E		BimL-I125E		BimL129E		BimI132E		BimL-CTS2A				BimL-4E			BimL-dCTS						BimL	BimL-V124E	BimL-I125E	BimL-L129E	BimL-I132E	BimL-CTS2A	BimL-dCTS	BimL-4E
	Alexa 647 labelled Bax concentration [nM]	Rep 1	Rep 2	Rep 3	Rep 1	Rep 2	Rep 1	Rep 2	Rep 1	Rep 2	Rep 1	Rep 2	Rep 1	Rep 2	Rep 3	Rep 4	Rep 1	Rep 2	Rep 3	Rep 1	Rep 2	Rep 3			One site -- Specific binding with Hill slope							Interrupted	Ambiguous
	0	1.95647	0.868504	1.90971																0.489572	1.11964	0.19373			Best-fit values
	1	5.21225	5.17522	3.18095																-0.79567	-1.80835	-0.44716			Bmax	64.33	66.23	28.5	30.09	26.6	62.03	37426	40
	2.5	0.522947	0.912901	1.83572																1.19393	0.820461	-1.10071			h	1.576	1.147	6.368	1.873	2.576	2.67	0.2657	~ 32.56
	5	8.79442	6.32695	8.71791																-0.49782	3.0619	1.18041			Kd	58.89	124.9	44.63	73.14	47.02	39.56	1.717e+18	~ 74893
	10	12.2756	12.2545	11.7913																-2.17875	-0.63312	0.927105			Std. Error
	20	22.3487	24.5034	24.7378																0.382705	1.33618	0.680389			Bmax	2.627	2.098	1.809	1.768	1.105	1.689		4.131
	40	48.0493	47.5337	49.9461																1.96734	2.24287	3.18443			h	0.2133	0.09174	18.78	0.4324	0.6419	0.4567		~
	80	66.792	66.7984	66.7906																4.05273	3.14294	1.92471			Kd	6.608	11.84	15.14	11.79	5.432	2.707		~
	160	71.7919	72.0545	72.2492																0.044429	0.695547	1.53074			95% CI (asymptotic)
	320	74.8588	75.1372	72.3927																3.11341	0.563807	1.01927			Bmax	59.01 to 69.66	62 to 70.47	24.83 to 32.16	26.51 to 33.67	24.37 to 28.84	58.66 to 65.4		31.6 to 48.41
	640	77.5272	76.8702	76.1226																-1.63272	0.847223	2.96706			h	1.144 to 2.009	0.9622 to 1.333	-31.69 to 44.42	0.9985 to 2.748	1.277 to 3.874	1.759 to 3.582		(Very wide)
	1000		75.2472	76.3377																4.31473	7.27314	4.94269			Kd	45.48 to 72.29	101 to 148.8	13.95 to 75.3	49.3 to 96.99	36.04 to 58.01	34.16 to 44.97		(Very wide)
	0				-2.73689	1.22995	-0.39413	0.984089	2.19765	4.47933	1.30116	-2.25436	-1.14481	1.06071	2.01497	-0.20168	5.82303	1.20994	11.7219						Goodness of Fit
	2				-1.56793	1.6182	-0.79668	0.665222	-1.0714	-3.6438	3.50426	-0.6727	-1.54813	-9.39117	-1.26872	-14.62	2.76122	-0.91604	-5.84313						Degrees of Freedom	36	41	37	39	39	67		33
	4				1.12976	3.10131	2.91444	4.82762	0.685028	0.160497		0.667657	-7.49246	7.20806	-14.9954	-1.61311	-1.51569	-4.27928	7.14068						R square	0.9554	0.9809	0.822	0.8913	0.9148	0.9208		0.7043
	10				0.06695	-0.16063	1.51561	5.90825	5.36469	-6.22548	3.45886	-4.25736	7.94591	8.03929	11.1022	5.3294	10.2069	6.20678	9.10824						Absolute Sum of Squares	1205	523.5	1616	888	558.8	3796		1126
	20				4.25109	0.438526	3.67503	-0.99275	0.666222	-1.62583	-2.15669	5.08608	2.59265	3.38511	2.59605	12.0547	8.82281	-2.80184	-3.69125						Sy.x	5.786	3.573	6.608	4.772	3.785	7.527		5.841
	40				10.2572	6.34191	6.26179	3.11175	1.8072	-1.25487	3.60672	2.23699	6.9114	18.0208	12.9805	11.0861	-0.33843	9.80475	6.4331
	100						15.1075	21.1678	9.15882	7.53006	9.45226	4.15543	41.392	27.3722	48.6127	35.5905	12.214	15.8885	8.64745
	200				36.6957	38.2489	24.5973	27.0838	19.0859	13.9182	15.9658	9.43269	53.2123	42.6467	58.3646	48.0912	2.40786	6.45538	12.2356
	400				43.6075	40.4352	26.5938	24.1317	18.5887	12.6142	16.2234	10.7607	55.5042	48.1517	58.5757	55.6627	11.7782	7.86426	1.45378
	1000				46.2399	47.7225	27.4731	28.4872	23.3942	14.0298	21.6934	17.8271	57.2385	39.5259	58.6485	47.8859	-2.89583	-4.14004	2.74561
			*Value in each cell represents % FRET efficiency between Alexa 568 labelled BimL protein and Alexa 647 labelled Bax

## Sheet: D)
	D) Bax activation by BimL																															Analysis
																																	BimL	BimL-V124E	BimL-I125E	BimL-L129E	BimL-I132E	BimL-CTS2A	BimL-dCTS	BimL-4E
																																Agonist vs. response -- Variable slope (four parameters)
																																Best-fit values
			BimL			BimL-V124E			BimL-I125E			BimL-L129E			BimL-I132E			BimL-CTS2A				BimL-4E			BimL-dCTS							BOTTOM	1.944	1.317	-1.386	-2.785	-3.147	-0.8677	-1.243	-1.243
		Concentration of Bim protein added (nM)	Rep 1	Rep 2	Rep 3	Rep 1	Rep 2	Rep 3	Rep 1	Rep 2	Rep 3	Rep 1	Rep 2	Rep 3	Rep 1	Rep 2	Rep 3	Rep 1	Rep 2	Rep 3	Rep 4	Rep 1	Rep 2	Rep 3	Rep 1	Rep 2	Rep 3					TOP	96	97.92	86.35	107.7	109.1	91.03	216.8	216.8
		0.1	20.5129	16.8516	15.7588	11.4179	4.1144	1.2987																								H	1.043	1.174	0.8753	0.4036	0.406	1.141	0.3298	0.3298
		0.2	30.5254	29.5463	25.3736	18.7456	11.9924	6.45226																								EC50	0.5487	1.209	104.7	2166	2803	3.235	489447	489447
		0.5	48.7886	52.5118	44.5792	30.518	32.661	14.2455																								EC50e			0.9325	0.2526	0.4523	0.05478	0.07806	0.07806
		1	66.2365	67.7851	60.6951	50.6894	49.3995	34.3501	-1.8416					-2.30966			-2.96201	1.59524	0.209874	-5.12301	-2.42355											Span	94.05	96.61	87.73	110.5	112.2	91.9	218	218
		2	84.0673	82.1902	77.2925	67.4297	67.9005	58.3345	-1.17373					-1.30752			-1.42872	5.67532	5.59315	1.44033	1.67365											Std. Error
		5	91.3095	91.7214	88.2959	83.5588	84.3033	83.3439	0.619788					-1.7258			-2.4086	13.2649	13.9124	8.16781	8.18052	5.7818	9.03754	8.93271								BOTTOM	2.533	2.151	1.7	4.028	5.937	1.883	2.412	2.412
		10	97.7935	95.1597	92.3502	91.4244	93.5035	82.9686	8.98591	6.71033	7.19678	3.719	7.05732	0.945377	4.86311	7.60646	-1.80677	24.0551	27.046	19.2359	16.9023	6.76916	8.797	13.496								TOP	1.453	1.99	3.507	20.83	32.69	3.286	313.2	313.2
		20	96.0909	97.1736	95.9434	95.5897	95.8677	93.3496	17.5352	13.0375	14.1596	7.32318	9.70939	3.24614	10.0931	12.0708	-1.37072	36.9141	36.325	32.7842	25.4936	6.29474	9.57448	24.9114								H	0.07818	0.1003	0.07416	0.1006	0.1442	0.116	0.1323	0.1323
		50	95.1138	98.2547	97.6126	96.3305	99.0832	97.9842	28.261	28.047	28.5188	15.4408	15.7148	10.109	20.8501	20.8506	-0.15621	56.2869	56.5733	51.9024	60.613	5.82629	10.4121	9.54653								EC50	0.04697	0.09287	13.51	2340	4426	0.328	3648527	3648527
		100							48.5043	42.4434	42.6956	22.546	20.7191	25.536	37.6869	30.4874	9.15781	66.0353	66.9278	65.7239	82.9828	6.10707	12.8921	12.8744								Span	3.195	3.336	4.147	22.95	35.82	4.335	315.1	315.1
		200							60.3768	53.1687	53.0734	25.5214	24.198	40.3762	48.7721	41.4064	13.8849	77.1276	73.7728	77.9083	90.4657	6.08504	14.6186	14.9567								95% CI (asymptotic)
		500							69.5807	61.4248	63.8624	23.4009	21.2616	42.8027	55.5349	41.6426	16.5444	80.2422	79.3117	82.4016	95.4134	7.29014	17.8844	17.1849								BOTTOM	-3.152 to 7.04	-3.054 to 5.688	-4.922 to 2.15	-10.93 to 5.363	-15.13 to 8.833	-4.662 to 2.927	-6.169 to 3.684	-6.169 to 3.684
		1000																				8.11115	16.6847	15.4356								TOP	93.07 to 98.92	93.88 to 102	79.06 to 93.64	65.55 to 149.8	43.1 to 175	84.4 to 97.65	-422.8 to 856.4	-422.8 to 856.4
		2000																														H	0.8855 to 1.2	0.9704 to 1.378	0.721 to 1.029	0.2001 to 0.607	0.115 to 0.6971	0.9072 to 1.375	0.05952 to 0.6	0.05952 to 0.6
																																EC50	0.4542 to 0.6432	1.02 to 1.398	76.58 to 132.8	-2568 to 6900	-6130 to 11735	2.574 to 3.896	-6961839 to 7940732	-6961839 to 7940732
		0																														EC50e			??? to 3.065	??? to 2.382	??? to 5.502	??? to 0.1845	??? to 1.126	??? to 1.126
		0.1																							5.84742	4.58651	-4.04711					Span	87.63 to 100.5	89.82 to 103.4	??? to 96.36	??? to 156.9	??? to 184.5	??? to 100.6	??? to 861.5	??? to 861.5
		0.25																							3.41017	3.08846	-5.72366					Goodness of Fit
		0.5																							2.86359	4.26084	-6.08389					Degrees of Freedom	47	34	21	39	42	44	30	30
		1																							3.08816	3.47405	-3.10255					R square	0.9789	0.9857	0.9837	0.8248	0.6825	0.9766	0.9253	0.9253
		2																							3.46147	4.15546	-4.31033					Absolute Sum of Squares	1022	705.4	285.5	2186	5357	1252	521.6	521.6
		5																							5.46484	4.63789	-2.40594					Sy.x	4.664	4.555	3.687	7.486	11.29	5.335	4.17	4.17
		10																							3.46147	7.26545	5.09582
		20																							5.46484	4.63789	-2.40594
		40																							9.83347	6.16986
		50																							15.8673	15.002
		100																							12.5
		200																							15.6047
		500																							21.368
		1000																							18.9775
					*Value in each cell represents ANTS Release (%)

## Sheet: E)
	D) BimL - Bcl-XL binding in solution																												Analysis
			BimL			BimL-V124E			BimL-I125E			BimL-L129E			BimL-I132E			BimL-CTS2A			BimL-4E			BimL-dCTS						BimL	BimL-V124E	BimL-I125E	BimL-L129E	BimL-I132E	BimL-CTS2A	BimL-dCTS	BimL-4E
		Concentration of Alexa 647 labelled Bcl-XL added (nM)	Rep 1	Rep 2	Rep 3	Rep 1	Rep 2	Rep 3	Rep 1	Rep 2	Rep 3	Rep 1	Rep 2	Rep 3	Rep 1	Rep 2	Rep 3	Rep 1	Rep 2	Rep 3	Rep 1	Rep 2	Rep 3	Rep 1	Rep 2	Rep 3			One site -- Specific binding with Hill slope								Ambiguous
		0				-3.79231	2.96702	-4.24775	0.449414	0.770009	3.67094	5.95389	-0.72786	0.19898	1.81547		-1.11637	-11.1572	-5.04897	3.20313	-7.16764	-8.92553	-15.0378						Best-fit values
		1				-0.93322	0.185454	2.33116	2.12432	2.02028	5.84615	0.039625	8.73486	3.3531	-1.64957	1.02241	5.87563	-15.1267	-6.62097	-8.42615	-1.55836	-6.50711	-3.62118						Bmax	52.97	54.32	60.09	55.92	57.41	60.51	23.9	40
		2				2.11632	1.74561	7.40678	5.95062	11.8487	4.78551	0.710672	5.80672	6.47792	8.22576	13.3349	22.8839	-3.69506	-1.54001	7.0923	0.060878	-2.15868	-3.03156						h	2.015	1.934	1.358	1.364	1.054	1.793	= 4	~ 32.6
		5				2.79873	14.3136	9.86215	19.2975	19.072	17.7765	11.1322	22.0115	12.8768	13.7659	12.1766	17.8652	-10.3797	22.1922	9.42972	-9.64099	-1.58538	-4.71104						Kd	8.284	11.33	8.059	9.07	9.752	10.9	17.24	~ 70594
		10				18.5234	22.9198	26.2955	27.6084	42.6125	40.5335	24.374	37.8488	39.3383	26.6794	26.3997	33.8436	35.2819	36.5447	38.317	-0.833	3.86554	-2.79013						Std. Error
		20				36.2606	45.2975	47.4734	29.6328	55.7375	56.8809	34.269	41.7532	44.0623	38.9254	41.0636	47.6478	38.9614	50.3509	37.0138	0.702619	4.12467	0.744237						Bmax	0.9334	1.535	3.129	1.903	2.185	2.051	0.9785	4.556
		50				47.8676	51.0934	49.4899	34.4698	59.9306	60.9474	39.7722	52.2315	53.6074	46.2061	45.8041	49.4054	59.1091	32.5277	58.5539	-0.2912	2.1973	-4.50866						h	0.1829	0.285	0.3018	0.1943	0.1324	0.3033	3.476	~
		100				44.111	54.1503	56.469	41.4898	64.7458	62.8864	51.9825	57.0608	58.1575	50.761	51.6763	53.7317	67.2194	62.4702	61.3719	0.23554	2.37139	2.78199						Kd	0.4307	0.9491	1.471	1.06	1.357	1.13		~
		200				46.7144	58.7437	55.5215	49.6479	66.7608	65.3257	50.6621	53.542	53.9881	51.779	56.4032	53.132	58.8962	61.2972	64.724	-8.68823	0.818617	-3.27614						95% CI (asymptotic)							21.92 to 25.89
		500				50.5309	60.9731	60.5298	52.8575	68.3525	65.9629	56.9552	60.1653	57.7614	59.5108	57.3617	58.3935	65.8239	63.781	67.5113	-12.0207	2.06773	-2.30382						Bmax	51.05 to 54.88	51.17 to 57.47	53.67 to 66.51	52.01 to 59.82	52.92 to 61.9	56.4 to 64.61	10.18 to 24.31	30.73 to 49.27
		1000																			-20.7132	8.19742	2.51195						h	1.639 to 2.39	1.349 to 2.519	0.7393 to 1.978	0.9651 to 1.763	0.7816 to 1.326	1.185 to 2.4		(Very wide)
																													Kd	7.4 to 9.167	9.383 to 13.28	5.041 to 11.08	6.896 to 11.24	6.963 to 12.54	8.635 to 13.16	34	(Very wide)
		1	7.56674	3.99599	1.55551																			0.585318	0.969311	-0.93318			Goodness of Fit
		2.5	7.71323	5.613	6.02422																			1.90414	-0.2255	-0.14377			Degrees of Freedom	27	27	27	27	26	57	235.3	33
		5	12.9933	9.19787	10.199																			3.44651	3.79803	2.63975			R square	0.9838	0.9664	0.8964	0.9559	0.9594	0.9119	2.63	0.7
		10	34.9616	34.1215	31.224																			6.48752	5.44989	7.32063			Absolute Sum of Squares	222.3	557.2	1871	651.7	509.9	3990		1370
		20	46.0891	45.3604	45.3205																			10.7781	11.7943	10.1061			Sy.x	2.869	4.543	8.324	4.913	4.428	8.366	A = 4	6.444
		40	48.5591	49.5712	49.7398																			15.407	13.6162	16.3202
		80	49.5188	49.0244	49.8688																			21.0554	22.833	21.9571
		160	55.2749	54.2041	51.8235																			20.8869	22.1623	21.1001
		320	56.1602	55.2912	55.4514																			24.0759	24.5507	24.8874
		640																						25.6994	23.6717	25.9461
				*Value in each cell represents % FRET efficiency between Alexa 568 labelled BimL protein and Alexa 647 labelled Bcl-XL
