# Supplementary material for: The carboxyl-terminal sequence of bim enables bax activation and killing of unprimed cells
Source: eLife. 2020 Jan 24;9:e44525. doi: 10.7554/eLife.44525 (PMC6980855; doi:10.7554/eLife.44525)
Supplement: Figure 7—figure supplement 1—source data 1. [file elife-44525-fig7-figsupp1-data1.xlsx]

## Sheet: A)
Figure 7 - Supporting Figure 1
	A) Bim proteins binding to purified mitochondria
		BimL			BimL-dCTS-MAO			BimL-dCTS
		Rep 1	Rep 2	Rep 3	Rep 1	Rep 2	Rep 3	Rep 1	Rep 2	Rep 3
	Bound to Mitochondria (%)	25.9951	22.4244	22.2355	22.8535	22.4018	24.1903	2.20564	1.91469	1.80204

## Sheet: B)
	B) BimL-Bax Binding at Mitochondria
		Alexa 568 Labelled BimL			Alexa 568 Labelled BimL-dCTS-MAO
	Concentration of Alexa 647 labelled Bax added (nM)	Rep 1	Rep 2	Rep 3	Rep 1	Rep 2	Rep 3
	2000	39.51	40.9032	43.5102	24.778	17.5196	19.2256
	1000	34.9375	34.4287	35.2771	16.1176	13.0652	11.4999
	500	26.8396	30.6504	30.6567	8.68726	8.59663	4.26888
	250	23.3597	26.9036	26.5806	8.00914	4.63677	6.11986
	125	16.4407	19.8067	23.1111	4.7624	2.8276	4.67975
	62.5	12.3998	13.4864	11.2757	2.86225	2.24566	0.404436
	31.25	4.53821	10.587	13.9722	1.52549	-0.720648	3.23546
	15.625	4.91431	4.40319	2.25162	1.73457	-0.543512	0.496986
	7.8125	3.01159	5.94248	7.59903	3.61572	-0.0170229	-1.23957
	3.90625	-0.0322782	3.5726	2.23218	1.44073	1.5679	0.718864
	1.95312	1.901	0.798388	0.321489	-0.55255	-0.321846	-1.09411
	0.5	-0.552438	-1.84228	0.203565	2.65801	0.58365	-0.89591
		*Value in cells indicates %FRET efficiency between Alexa 568 labelled BimL and Alexa 647 labelled Bax
