# Supplementary material for: The carboxyl-terminal sequence of bim enables bax activation and killing of unprimed cells
Source: eLife. 2020 Jan 24;9:e44525. doi: 10.7554/eLife.44525 (PMC6980855; doi:10.7554/eLife.44525)
Supplement: Figure 7—figure supplement 2—source data 1. [file elife-44525-fig7-figsupp2-data1.xlsx]

## Sheet: All size markers
Blue Dextran	Blue Dextran		BSA	BSA		Carbonic Anhydrase and Alcohol Dehydrogenase	Carbonic Anhydrase and Alcohol Dehydrogenase		cytc and beta-amylase	cytc and beta-amylase
UV1 (280 nm)_volume	UV1 (280 nm)_mAU		UV1 (280 nm)_volume	UV1 (280 nm)_mAU		UV1 (280 nm)_volume	UV1 (280 nm)_mAU		UV1 (280 nm)_volume	UV1 (280 nm)_mAU
0.000835419	-1723.71		0.000835419	-0.237		0.000835419	0.485		0.000835419	0.07
0.00337982	-1723.71		0.00362778	-0.237		0.00352097	0.485		0.0034523	0.07
0.00417328	-1723.71		0.00416946	-0.237		0.00416946	0.485		0.00416946	0.07
0.00583649	-1723.71		0.00583649	-0.237		0.00583649	0.485		0.00583649	0.07
0.00750351	-1723.71		0.00750351	-0.237		0.00750351	0.485		0.00750351	0.07
0.00917053	-1723.71		0.00917053	-0.237		0.0091629	0.485		0.00917053	0.07
0.0125084	0.411		0.0125046	0.196		0.0124969	0.247		0.0125084	0.196
0.0141754	0.663		0.0141754	0.319		0.0141678	0.386		0.0141754	0.327
0.0150108	0.929		0.0141754	0.319		0.0150032	0.386		0.0141754	0.327
0.0158463	1.195		0.0158424	0.46		0.0158386	0.537		0.0158424	0.478
0.0175133	1.46		0.0175056	0.606		0.0175018	0.696		0.0175056	0.633
0.0200157	1.718		0.0200119	0.888		0.0200081	0.841		0.0200119	0.922
0.0208511	1.97		0.0208473	0.888		0.0208397	0.978		0.0208473	0.922
0.0225182	2.208		0.0225105	1.109		0.0225067	1.094		0.0225105	1.045
0.0241814	2.424		0.0241776	1.191		0.0241737	1.197		0.0241776	1.149
0.0258484	2.616		0.0258446	1.191		0.0258369	1.281		0.0258446	1.235
0.0275192	2.77		0.0275116	1.306		0.0275078	1.346		0.0275116	1.31
0.0291862	2.891		0.0291824	1.338		0.0291748	1.392		0.0291824	1.365
0.0308533	2.974		0.0308495	1.338		0.0308418	1.422		0.0308495	1.403
0.0325165	3.026		0.0325127	1.357		0.0325089	1.436		0.0325127	1.421
0.0341835	3.059		0.0341797	1.344		0.0341721	1.433		0.0341797	1.419
0.0358543	3.077		0.0366821	1.318		0.0366783	1.385		0.0366821	1.37
0.0375214	3.082		0.0375175	1.279		0.0375099	1.385		0.0375175	1.37
0.039196	3.075		0.0391846	1.235		0.0391769	1.343		0.0391846	1.323
0.0408554	3.053		0.0408478	1.179		0.040844	1.288		0.0408478	1.195
0.0425186	3.011		0.0425148	1.122		0.0425072	1.229		0.0425148	1.195
0.0441895	2.954		0.0441856	1.06		0.044178	1.158		0.0442009	1.121
0.0458603	2.877		0.0458527	0.998		0.045845	1.09		0.0458488	1.047
0.0475235	2.784		0.0475197	0.933		0.0475121	1.015		0.0475159	0.97
0.0491905	2.676		0.0491867	0.872		0.0491791	0.86		0.0491829	0.816
0.0508575	2.553		0.0508499	0.811		0.0508423	0.86		0.0508461	0.816
0.0525246	2.422		0.0533562	0.754		0.0533485	0.71		0.0533524	0.67
0.0541954	2.283		0.0541878	0.693		0.0541801	0.635		0.0541878	0.67
0.0558586	2.136		0.0558548	0.638		0.0558472	0.635		0.055851	0.54
0.0575256	1.991		0.0575218	0.579		0.0575142	0.567		0.057518	0.484
0.0591927	1.844		0.059185	0.528		0.0591774	0.499		0.059185	0.427
0.0608597	1.556		0.0608559	0.48		0.0608482	0.439		0.0608521	0.377
0.0625305	1.556		0.0625267	0.438		0.0625153	0.331		0.0625229	0.333
0.0641899	1.42		0.0641899	0.395		0.0641823	0.285		0.0641861	0.289
0.0658531	1.289		0.0658569	0.36		0.0658493	0.244		0.0658531	0.248
0.0675201	1.164		0.067524	0.323		0.0675125	0.209		0.0675201	0.211
0.069191	0.933		0.0700264	0.261		0.0700188	0.175		0.0691872	0.177
0.070858	0.933		0.0708618	0.261		0.0708504	0.147		0.070858	0.147
0.072525	0.728		0.0725288	0.23		0.0725174	0.119		0.072525	0.116
0.0741882	0.637		0.074192	0.202		0.0741844	0.096		0.0741882	0.09
0.0758553	0.554		0.0758591	0.172		0.0758476	0.07		0.0758553	0.067
0.0775261	0.48		0.0775261	0.144		0.0775185	0.046		0.0775261	0.041
0.0791931	0.408		0.0791969	0.082		0.0791855	0.025		0.0791931	0.021
0.0808601	0.341		0.080864	0.082		0.0808525	0.002		0.0808601	0.002
0.0825272	0.278		0.0825272	0.022		0.0825195	-0.016		0.0825233	-0.019
0.0841904	0.224		0.0841942	0.022		0.0841827	-0.037		0.0841827	-0.036
0.0866966	0.172		0.085865	-0.033		0.086689	-0.055		0.086689	-0.073
0.087532	0.12		0.087532	-0.033		0.0875206	-0.075		0.0875206	-0.073
0.0891953	0.072		0.0891991	-0.059		0.0891876	-0.089		0.0891876	-0.086
0.0908623	0.027		0.0908661	-0.103		0.0908546	-0.105		0.0908546	-0.098
0.0925255	-0.011		0.0925293	-0.103		0.0925179	-0.119		0.0925179	-0.109
0.0941963	-0.047		0.0942001	-0.137		0.0941887	-0.135		0.0941887	-0.122
0.0958672	-0.082		0.0958672	-0.15		0.0958557	-0.146		0.0958595	-0.13
0.0975304	-0.114		0.0975304	-0.161		0.0975227	-0.16		0.0975227	-0.136
0.0991974	-0.141		0.0991974	-0.17		0.0991898	-0.168		0.0991898	-0.144
0.100864	-0.164		0.100861	-0.18		0.100853	-0.176		0.100853	-0.149
0.103367	-0.212		0.102524	-0.186		0.103359	-0.191		0.103359	-0.162
0.104202	-0.212		0.104195	-0.194		0.104191	-0.191		0.104195	-0.168
0.105869	-0.235		0.105858	-0.2		0.105858	-0.195		0.105858	-0.173
0.107533	-0.256		0.107525	-0.205		0.107525	-0.199		0.107525	-0.18
0.1092	-0.276		0.109192	-0.211		0.109188	-0.194		0.109192	-0.18
0.11087	-0.297		0.110859	-0.216		0.110859	-0.193		0.110859	-0.195
0.112537	-0.314		0.11253	-0.226		0.112526	-0.193		0.11253	-0.199
0.114204	-0.327		0.114197	-0.231		0.114193	-0.192		0.114197	-0.199
0.115868	-0.337		0.11586	-0.24		0.11586	-0.192		0.11586	-0.214
0.117535	-0.344		0.117527	-0.243		0.117523	-0.195		0.117527	-0.223
0.119205	-0.347		0.120029	-0.247		0.120029	-0.201		0.119198	-0.232
0.120872	-0.347		0.120865	-0.247		0.120861	-0.207		0.120865	-0.237
0.12254	-0.352		0.122532	-0.249		0.122528	-0.212		0.122532	-0.242
0.124207	-0.352		0.124195	-0.247		0.124195	-0.215		0.124195	-0.248
0.12587	-0.356		0.125862	-0.245		0.125858	-0.22		0.125862	-0.254
0.127541	-0.364		0.127533	-0.237		0.127529	-0.222		0.127533	-0.264
0.129211	-0.364		0.1292	-0.235		0.129196	-0.223		0.1292	-0.268
0.130875	-0.37		0.130867	-0.225		0.130863	-0.224		0.130867	-0.271
0.132542	-0.373		0.132534	-0.219		0.13253	-0.226		0.132534	-0.274
0.134209	-0.381		0.134197	-0.206		0.134193	-0.222		0.134197	-0.269
0.136711	-0.389		0.136703	-0.182		0.1367	-0.222		0.135868	-0.269
0.137547	-0.395		0.137535	-0.182		0.137531	-0.22		0.137539	-0.266
0.13921	-0.401		0.139202	-0.173		0.139198	-0.221		0.139202	-0.258
0.140877	-0.406		0.140869	-0.148		0.140865	-0.217		0.140869	-0.25
0.142544	-0.408		0.142532	-0.148		0.142529	-0.216		0.142536	-0.239
0.144211	-0.408		0.144203	-0.12		0.144199	-0.213		0.144203	-0.225
0.145882	-0.409		0.14587	-0.11		0.145866	-0.214		0.145874	-0.213
0.147549	-0.404		0.147533	-0.11		0.147533	-0.215		0.147537	-0.193
0.149212	-0.399		0.1492	-0.102		0.1492	-0.218		0.149204	-0.175
0.150879	-0.394		0.150867	-0.094		0.150864	-0.22		0.150871	-0.156
0.153381	-0.392		0.152534	-0.084		0.152534	-0.221		0.153374	-0.121
0.154217	-0.385		0.154205	-0.084		0.154202	-0.223		0.154209	-0.121
0.155884	-0.38		0.155872	-0.082		0.155861	-0.228		0.155876	-0.103
0.157547	-0.376		0.157536	-0.08		0.157528	-0.226		0.157539	-0.088
0.159214	-0.372		0.159203	-0.079		0.159191	-0.229		0.159206	-0.075
0.160885	-0.372		0.16087	-0.08		0.160862	-0.226		0.160877	-0.065
0.162552	-0.371		0.16254	-0.081		0.162529	-0.227		0.162544	-0.055
0.164219	-0.37		0.164207	-0.081		0.164196	-0.223		0.164211	-0.054
0.165886	-0.368		0.165871	-0.079		0.165863	-0.221		0.165874	-0.053
0.167549	-0.365		0.167538	-0.072		0.167526	-0.218		0.167542	-0.053
0.170055	-0.36		0.17004	-0.068		0.170033	-0.214		0.170048	-0.05
0.170891	-0.36		0.170876	-0.063		0.170864	-0.214		0.170879	-0.05
0.172554	-0.355		0.172543	-0.06		0.172531	-0.214		0.172546	-0.045
0.174221	-0.352		0.17421	-0.058		0.174198	-0.216		0.174213	-0.042
0.175888	-0.346		0.175873	-0.055		0.175861	-0.215		0.175877	-0.042
0.177555	-0.332		0.177544	-0.059		0.177532	-0.22		0.177639	-0.041
0.179226	-0.332		0.179214	-0.06		0.179199	-0.223		0.179214	-0.042
0.180889	-0.319		0.180878	-0.066		0.180866	-0.225		0.180878	-0.042
0.182556	-0.31		0.182545	-0.072		0.182533	-0.226		0.182545	-0.042
0.184223	-0.3		0.184208	-0.077		0.184196	-0.227		0.184212	-0.042
0.186726	-0.285		0.186714	-0.083		0.186703	-0.227		0.186714	-0.046
0.187561	-0.275		0.18755	-0.089		0.187534	-0.227		0.18755	-0.052
0.189228	-0.275		0.189213	-0.095		0.189201	-0.226		0.189213	-0.058
0.190891	-0.262		0.19088	-0.099		0.190868	-0.218		0.19088	-0.063
0.192558	-0.256		0.192547	-0.107		0.192532	-0.214		0.192547	-0.07
0.194229	-0.25		0.194214	-0.111		0.194202	-0.207		0.194214	-0.08
0.195896	-0.239		0.195885	-0.114		0.195869	-0.2		0.195885	-0.09
0.197563	-0.231		0.197552	-0.117		0.197536	-0.19		0.197552	-0.097
0.19923	-0.224		0.199215	-0.118		0.199203	-0.179		0.199215	-0.107
0.200893	-0.214		0.200882	-0.121		0.200867	-0.17		0.200882	-0.111
0.2034	-0.206		0.203384	-0.125		0.203373	-0.161		0.203384	-0.116
0.204231	-0.196		0.20422	-0.133		0.204205	-0.155		0.20422	-0.118
0.205898	-0.188		0.205887	-0.133		0.205872	-0.151		0.205887	-0.12
0.207565	-0.183		0.20755	-0.14		0.207539	-0.143		0.207554	-0.126
0.209221	-0.176		0.209217	-0.14		0.209202	-0.143		0.209217	-0.128
0.210892	-0.172		0.210888	-0.15		0.210873	-0.136		0.210888	-0.133
0.212563	-0.169		0.212555	-0.153		0.21254	-0.134		0.212555	-0.134
0.214226	-0.168		0.214222	-0.153		0.214207	-0.128		0.214222	-0.135
0.215893	-0.163		0.215889	-0.159		0.215874	-0.124		0.215889	-0.137
0.21756	-0.166		0.217552	-0.163		0.217537	-0.12		0.217552	-0.137
0.220062	-0.165		0.220058	-0.164		0.220043	-0.112		0.220058	-0.137
0.220898	-0.161		0.220894	-0.162		0.220875	-0.112		0.220894	-0.137
0.222561	-0.161		0.222557	-0.163		0.222542	-0.109		0.222557	-0.134
0.224228	-0.155		0.224224	-0.154		0.224209	-0.108		0.224224	-0.128
0.225895	-0.151		0.225887	-0.148		0.225872	-0.099		0.225891	-0.127
0.227562	-0.149		0.227558	-0.142		0.227543	-0.087		0.227558	-0.122
0.229233	-0.145		0.229225	-0.138		0.22921	-0.087		0.229229	-0.122
0.2309	-0.144		0.230888	-0.136		0.230877	-0.078		0.230885	-0.119
0.232563	-0.142		0.232555	-0.137		0.232544	-0.067		0.232552	-0.111
0.23423	-0.139		0.234222	-0.14		0.234207	-0.059		0.234219	-0.107
0.236732	-0.138		0.236725	-0.144		0.236713	-0.042		0.236721	-0.103
0.237568	-0.138		0.23756	-0.148		0.237545	-0.037		0.237556	-0.097
0.239235	-0.136		0.239227	-0.156		0.239212	-0.037		0.239223	-0.092
0.240898	-0.134		0.240891	-0.158		0.240879	-0.042		0.240887	-0.09
0.242565	-0.132		0.242558	-0.166		0.242542	-0.047		0.242554	-0.087
0.244236	-0.132		0.244228	-0.168		0.244213	-0.052		0.244225	-0.086
0.245903	-0.131		0.245895	-0.171		0.24588	-0.061		0.245892	-0.088
0.24757	-0.129		0.247555	-0.171		0.247547	-0.067		0.247559	-0.089
0.249237	-0.129		0.249218	-0.171		0.249214	-0.073		0.249222	-0.094
0.2509	-0.127		0.250885	-0.166		0.250877	-0.078		0.250889	-0.096
0.254238	-0.127		0.254219	-0.166		0.254211	-0.078		0.254223	-0.096
0.25507	-0.127		0.255054	-0.166		0.255047	-0.078		0.255058	-0.096
0.255989	-0.127		0.25589	-0.166		0.255882	-0.078		0.255917	-0.096
0.257572	-0.127		0.257557	-0.166		0.257549	-0.078		0.257561	-0.096
0.259239	-0.127		0.25922	-0.166		0.259212	-0.078		0.259224	-0.096
0.262573	0.055		0.262558	-0.005		0.262547	0.034		0.262562	0.027
0.264389	0.165		0.264294	0.094		0.264366	0.134		0.264252	0.129
0.265072	0.165		0.26506	0.22		0.265049	0.134		0.26506	0.129
0.265907	0.296		0.265896	0.22		0.265884	0.252		0.265896	0.254
0.267574	0.436		0.267559	0.357		0.267548	0.385		0.267563	0.391
0.270077	0.576		0.270065	0.637		0.270054	0.656		0.26923	0.524
0.270912	0.708		0.270901	0.768		0.270885	0.656		0.270901	0.652
0.272579	0.823		0.272564	0.768		0.272552	0.778		0.272564	0.77
0.274242	0.924		0.274231	0.879		0.27422	0.884		0.274231	0.873
0.275909	1.009		0.275898	0.975		0.275883	0.975		0.275898	0.955
0.278412	1.133		0.2784	1.118		0.277554	1.052		0.277565	1.029
0.279247	1.133		0.279236	1.166		0.279221	1.112		0.279236	1.086
0.280914	1.172		0.280903	1.199		0.280888	1.159		0.280903	1.125
0.282581	1.194		0.282566	1.214		0.282555	1.191		0.282566	1.15
0.284245	1.201		0.284233	1.216		0.284218	1.208		0.284233	1.158
0.286751	1.175		0.286736	1.201		0.286724	1.198		0.286736	1.132
0.287582	1.175		0.287571	1.179		0.287556	1.175		0.287571	1.1
0.289249	1.145		0.289238	1.145		0.289223	1.175		0.289238	1.059
0.290916	1.107		0.290901	1.104		0.29089	1.143		0.290905	1.009
0.29258	1.058		0.292568	1.053		0.292553	1.107		0.292568	1.009
0.295086	0.945		0.295074	1		0.294224	1.021		0.295074	0.888
0.295921	0.882		0.296741	0.941		0.295891	1.021		0.295906	0.819
0.297585	0.882		0.297577	0.883		0.297558	0.927		0.297573	0.751
0.299252	0.82		0.299244	0.82		0.299225	0.877		0.29924	0.686
0.300919	0.762		0.300907	0.757		0.30088	0.829		0.300903	0.619
0.302586	0.643		0.303413	0.693		0.302551	0.784		0.303417	0.554
0.304253	0.643		0.304249	0.635		0.304218	0.738		0.304245	0.495
0.305916	0.594		0.305912	0.58		0.305885	0.691		0.305908	0.435
0.307583	0.551		0.307579	0.525		0.307552	0.645		0.307575	0.378
0.30925	0.473		0.309242	0.469		0.309216	0.604		0.309242	0.327
0.311752	0.442		0.311749	0.365		0.311722	0.565		0.311745	0.277
0.312588	0.414		0.312584	0.365		0.312553	0.529		0.31258	0.233
0.314255	0.39		0.314247	0.319		0.31422	0.495		0.314243	0.191
0.315918	0.368		0.315914	0.276		0.315887	0.467		0.31591	0.152
0.317585	0.357		0.317581	0.234		0.317551	0.435		0.317577	0.115
0.320087	0.348		0.320084	0.151		0.320057	0.41		0.32008	0.081
0.320923	0.344		0.320919	0.151		0.320889	0.385		0.320915	0.048
0.32259	0.339		0.322586	0.114		0.322556	0.368		0.322582	0.017
0.324257	0.338		0.324249	0.08		0.324223	0.348		0.324245	-0.011
0.32592	0.34		0.325916	0.046		0.325886	0.33		0.325912	-0.037
0.327591	0.345		0.328419	-0.01		0.328392	0.301		0.328415	-0.094
0.329254	0.357		0.329254	-0.033		0.329224	0.301		0.32925	-0.094
0.330921	0.366		0.330921	-0.033		0.330891	0.283		0.330917	-0.12
0.332588	0.375		0.332584	-0.073		0.332558	0.271		0.332584	-0.145
0.334251	0.385		0.334251	-0.073		0.334221	0.254		0.334248	-0.165
0.336758	0.396		0.336758	-0.103		0.336727	0.218		0.336754	-0.21
0.337593	0.403		0.337589	-0.11		0.337559	0.218		0.337585	-0.21
0.339256	0.416		0.339256	-0.11		0.339226	0.199		0.339252	-0.228
0.340923	0.43		0.340923	-0.12		0.340893	0.179		0.340919	-0.247
0.34259	0.444		0.342587	-0.122		0.342556	0.161		0.342583	-0.258
0.345093	0.469		0.345093	-0.12		0.345062	0.122		0.345089	-0.279
0.345928	0.469		0.345928	-0.12		0.345894	0.106		0.345924	-0.279
0.347595	0.484		0.347591	-0.113		0.347561	0.106		0.347588	-0.294
0.349258	0.501		0.349258	-0.113		0.349228	0.092		0.349255	-0.295
0.350925	0.519		0.350922	-0.104		0.350891	0.08		0.350922	-0.295
0.353428	0.553		0.353428	-0.098		0.352562	0.06		0.353424	-0.294
0.355091	0.573		0.354263	-0.086		0.354229	0.06		0.354259	-0.294
0.355927	0.573		0.355927	-0.078		0.355896	0.054		0.355927	-0.294
0.35759	0.594		0.357594	-0.064		0.357563	0.049		0.35759	-0.291
0.359257	0.613		0.359261	-0.051		0.359226	0.047		0.359257	-0.291
0.361759	0.654		0.361763	-0.041		0.361732	0.051		0.361759	-0.292
0.362595	0.676		0.363434	-0.035		0.362564	0.056		0.362595	-0.294
0.364262	0.676		0.364269	-0.025		0.364231	0.06		0.364262	-0.294
0.365929	0.7		0.365932	-0.018		0.365898	0.07		0.365925	-0.294
0.367592	0.722		0.367599	-0.009		0.367561	0.076		0.367592	-0.3
0.370098	0.76		0.370102	-0.003		0.370068	0.088		0.370094	-0.306
0.37093	0.775		0.370937	-0.001		0.370899	0.096		0.37093	-0.313
0.372597	0.786		0.372604	0.001		0.372566	0.101		0.372597	-0.314
0.374264	0.798		0.374268	0.002		0.374233	0.104		0.374264	-0.314
0.375927	0.807		0.375935	0		0.375896	0.103		0.375919	-0.314
0.378433	0.816		0.378441	0.002		0.378403	0.103		0.378426	-0.312
0.379269	0.824		0.380108	-0.001		0.379234	0.102		0.379257	-0.312
0.380932	0.826		0.380943	-0.001		0.380901	0.099		0.380924	-0.313
0.382599	0.825		0.38261	-0.001		0.382568	0.096		0.382591	-0.313
0.384266	0.818		0.384274	-0.005		0.384232	0.095		0.384254	-0.311
0.386768	0.811		0.38678	-0.012		0.386738	0.091		0.386761	-0.31
0.387604	0.8		0.387615	-0.013		0.387569	0.091		0.387596	-0.308
0.389267	0.79		0.389278	-0.013		0.389236	0.088		0.389259	-0.304
0.390934	0.78		0.390945	-0.02		0.390903	0.086		0.390926	-0.297
0.392601	0.772		0.392612	-0.02		0.392567	0.08		0.392593	-0.291
0.395103	0.763		0.395103	-0.027		0.395073	0.073		0.395096	-0.262
0.395939	0.754		0.395939	-0.028		0.395905	0.073		0.395931	-0.262
0.397606	0.748		0.397602	-0.028		0.397572	0.067		0.397594	-0.247
0.399269	0.747		0.399269	-0.03		0.399239	0.064		0.399261	-0.229
0.400936	0.752		0.400936	-0.035		0.400902	0.06		0.400928	-0.215
0.403439	0.776		0.403439	-0.041		0.402573	0.057		0.403431	-0.175
0.404274	0.776		0.404274	-0.043		0.404243	0.057		0.404266	-0.158
0.405941	0.796		0.405941	-0.046		0.405903	0.055		0.405933	-0.158
0.407608	0.817		0.407604	-0.052		0.40757	0.049		0.407597	-0.123
0.409271	0.838		0.409271	-0.063		0.409233	0.043		0.409264	-0.123
0.411777	0.874		0.411774	-0.069		0.411739	0.032		0.411766	-0.095
0.413445	0.891		0.412609	-0.078		0.412571	0.027		0.412601	-0.082
0.41428	0.891		0.414276	-0.088		0.414238	0.027		0.414268	-0.082
0.415947	0.902		0.415939	-0.092		0.415905	0.017		0.415936	-0.063
0.41761	0.91		0.417606	-0.097		0.417568	0.011		0.417599	-0.063
0.420116	0.921		0.420113	-0.101		0.419239	0.01		0.420105	-0.046
0.421783	0.928		0.420944	-0.102		0.420902	0.003		0.420937	-0.041
0.422619	0.928		0.422611	-0.099		0.422569	0.003		0.422604	-0.032
0.424286	0.93		0.424278	-0.098		0.424236	0.001		0.424271	-0.024
0.425953	0.932		0.425941	-0.091		0.4259	0.003		0.425934	-0.017
0.428455	0.923		0.427612	-0.087		0.428406	0.003		0.42844	-0.008
0.430126	0.912		0.429279	-0.08		0.429237	0.007		0.429276	-0.002
0.430962	0.912		0.430943	-0.074		0.430904	0.007		0.430939	0.004
0.432625	0.893		0.43261	-0.067		0.432571	0.01		0.432606	0.01
0.434292	0.888		0.434273	-0.066		0.434235	0.012		0.434273	0.015
0.436794	0.879		0.436779	-0.066		0.436741	0.016		0.436775	0.018
0.438465	0.869		0.437614	-0.066		0.437572	0.016		0.437611	0.022
0.439301	0.855		0.439278	-0.064		0.43924	0.023		0.439278	0.023
0.440964	0.844		0.440945	-0.064		0.440907	0.029		0.440941	0.023
0.442631	0.83		0.442612	-0.066		0.44257	0.036		0.442608	0.023
0.445133	0.82		0.445114	-0.07		0.445076	0.042		0.44511	0.019
0.446804	0.807		0.446785	-0.07		0.445896	0.05		0.445946	0.013
0.447639	0.795		0.44762	-0.07		0.447563	0.057		0.447613	0.008
0.449306	0.785		0.449284	-0.075		0.449226	0.069		0.449276	0.002
0.45097	0.768		0.450951	-0.076		0.450893	0.077		0.450943	-0.006
0.453476	0.751		0.453453	-0.089		0.453396	0.094		0.452621	-0.014
0.455143	0.735		0.454288	-0.091		0.454231	0.094		0.454277	-0.025
0.455978	0.725		0.455956	-0.091		0.455898	0.097		0.455944	-0.034
0.457645	0.714		0.457619	-0.095		0.457561	0.099		0.457611	-0.042
0.459309	0.7		0.459286	-0.103		0.459229	0.096		0.459274	-0.053
0.461815	0.691		0.461792	-0.103		0.461731	0.092		0.461781	-0.068
0.46265	0.683		0.462624	-0.105		0.462566	0.086		0.462612	-0.068
0.464314	0.677		0.464291	-0.102		0.464233	0.086		0.464279	-0.071
0.465981	0.67		0.465958	-0.101		0.465897	0.075		0.465946	-0.074
0.467648	0.665		0.467621	-0.095		0.467564	0.063		0.467609	-0.074
0.469315	0.665		0.470127	-0.089		0.470066	0.045		0.470116	-0.071
0.470982	0.666		0.470963	-0.081		0.470901	0.04		0.470951	-0.07
0.472649	0.672		0.472626	-0.07		0.472569	0.04		0.472614	-0.07
0.474312	0.682		0.474293	-0.06		0.474232	0.033		0.474281	-0.059
0.475979	0.689		0.47596	-0.045		0.475899	0.024		0.475948	-0.059
0.478481	0.698		0.478462	-0.03		0.478401	0.011		0.478451	-0.047
0.479317	0.705		0.480133	-0.014		0.479237	0.008		0.479286	-0.045
0.480984	0.705		0.480965	0		0.480904	0.008		0.480953	-0.042
0.482647	0.714		0.482632	0.013		0.482567	0.01		0.482616	-0.041
0.484314	0.718		0.484299	0.022		0.484234	0.014		0.484283	-0.043
0.486816	0.732		0.486801	0.027		0.486736	0.02		0.486786	-0.049
0.487652	0.738		0.487637	0.031		0.487572	0.027		0.487621	-0.052
0.489319	0.738		0.489304	0.034		0.489239	0.038		0.489288	-0.058
0.490986	0.744		0.490967	0.031		0.490902	0.046		0.490952	-0.065
0.492649	0.762		0.492634	0.031		0.492569	0.053		0.492619	-0.075
0.495155	0.775		0.495136	0.026		0.495071	0.059		0.494289	-0.087
0.495991	0.787		0.496807	0.024		0.496742	0.06		0.495953	-0.099
0.497654	0.797		0.497643	0.024		0.497578	0.056		0.49762	-0.108
0.499321	0.807		0.499306	0.022		0.499241	0.049		0.499287	-0.115
0.500977	0.815		0.500973	0.023		0.500908	0.041		0.50095	-0.119
0.503483	0.819		0.503479	0.031		0.50341	0.024		0.503456	-0.125
0.50515	0.823		0.504311	0.031		0.504246	0.024		0.504292	-0.13
0.505985	0.822		0.505978	0.037		0.505913	0.017		0.505955	-0.131
0.507652	0.818		0.507645	0.039		0.507576	0.013		0.507622	-0.131
0.509319	0.809		0.509308	0.042		0.509243	0.008		0.509285	-0.131
0.511822	0.802		0.511814	0.053		0.511745	0.001		0.511791	-0.126
0.512657	0.789		0.513481	0.056		0.513416	-0.002		0.512627	-0.126
0.514324	0.781		0.514317	0.056		0.514252	-0.002		0.51429	-0.129
0.515987	0.772		0.515984	0.06		0.515915	-0.002		0.515957	-0.129
0.517654	0.765		0.517651	0.062		0.517582	-0.001		0.517624	-0.128
0.520157	0.76		0.520153	0.074		0.520084	0.001		0.520126	-0.126
0.521828	0.752		0.520988	0.081		0.52092	0.001		0.520962	-0.126
0.522663	0.75		0.522652	0.091		0.522587	0.004		0.522621	-0.128
0.524326	0.748		0.524319	0.097		0.52425	0.009		0.524284	-0.126
0.525993	0.744		0.525986	0.104		0.525917	0.016		0.525951	-0.126
0.528496	0.736		0.528488	0.109		0.528419	0.028		0.528454	-0.121
0.530167	0.736		0.530159	0.115		0.529255	0.037		0.529289	-0.115
0.531002	0.736		0.530994	0.115		0.530922	0.037		0.530956	-0.115
0.532669	0.736		0.532658	0.122		0.532585	0.046		0.532619	-0.109
0.534332	0.733		0.534325	0.125		0.534252	0.064		0.534286	-0.109
0.536839	0.735		0.536827	0.132		0.536755	0.07		0.536789	-0.102
0.538506	0.733		0.537663	0.135		0.53759	0.078		0.537624	-0.097
0.539341	0.733		0.539322	0.14		0.539257	0.081		0.539291	-0.095
0.541008	0.731		0.540985	0.146		0.54092	0.081		0.540958	-0.096
0.542671	0.724		0.542652	0.151		0.542587	0.081		0.542622	-0.095
0.545177	0.705		0.544323	0.157		0.54509	0.082		0.545128	-0.098
0.546848	0.693		0.545986	0.162		0.546761	0.08		0.545959	-0.102
0.54768	0.693		0.547653	0.17		0.547596	0.08		0.547626	-0.101
0.549347	0.685		0.54932	0.178		0.549259	0.079		0.549294	-0.103
0.551014	0.676		0.550983	0.182		0.550926	0.078		0.550957	-0.103
0.553516	0.649		0.55349	0.195		0.553478	0.075		0.553463	-0.092
0.554352	0.634		0.554325	0.195		0.55426	0.075		0.554298	-0.092
0.556019	0.618		0.555988	0.196		0.555927	0.073		0.555962	-0.084
0.557682	0.601		0.557655	0.198		0.55759	0.075		0.557629	-0.077
0.559349	0.586		0.559322	0.195		0.559258	0.075		0.559296	-0.07
0.561852	0.574		0.561825	0.193		0.56176	0.08		0.561798	-0.064
0.562687	0.563		0.563496	0.192		0.562595	0.083		0.562634	-0.061
0.564354	0.554		0.564327	0.192		0.564262	0.086		0.564301	-0.051
0.566017	0.545		0.565994	0.191		0.565926	0.085		0.565964	-0.044
0.567684	0.539		0.567661	0.194		0.567593	0.088		0.567631	-0.037
0.570187	0.529		0.570194	0.195		0.569263	0.087		0.570133	-0.025
0.571022	0.522		0.570995	0.193		0.570927	0.089		0.570969	-0.025
0.572689	0.513		0.572662	0.193		0.572594	0.091		0.572636	-0.024
0.574356	0.506		0.574326	0.188		0.574257	0.096		0.574299	-0.02
0.576019	0.498		0.575993	0.188		0.575924	0.097		0.575966	-0.017
0.578526	0.495		0.578495	0.181		0.577595	0.099		0.578468	-0.005
0.579361	0.492		0.57933	0.173		0.579258	0.099		0.579304	-0.005
0.581024	0.489		0.580997	0.171		0.580925	0.1		0.580971	0
0.582691	0.492		0.582661	0.164		0.582588	0.098		0.582638	0.006
0.584354	0.489		0.584328	0.16		0.584255	0.096		0.584301	0.005
0.586861	0.486		0.586834	0.153		0.586758	0.092		0.586807	0.01
0.587696	0.486		0.587666	0.153		0.587593	0.088		0.587643	0.012
0.589359	0.481		0.589333	0.147		0.58926	0.088		0.589306	0.012
0.591026	0.476		0.591	0.143		0.590923	0.086		0.590973	0.01
0.592693	0.472		0.592663	0.133		0.592583	0.078		0.592636	0.01
0.595196	0.471		0.595169	0.127		0.595085	0.07		0.595142	0
0.596867	0.464		0.596004	0.114		0.596756	0.068		0.595978	-0.006
0.597702	0.464		0.597668	0.108		0.597591	0.064		0.597641	-0.006
0.599365	0.46		0.599335	0.1		0.599255	0.06		0.599308	-0.012
0.601032	0.458		0.601002	0.093		0.600922	0.059		0.600975	-0.02
0.603535	0.459		0.603527	0.087		0.603424	0.059		0.603477	-0.023
0.604378	0.458		0.604336	0.079		0.605095	0.061		0.604313	-0.031
0.606037	0.458		0.605999	0.071		0.60593	0.066		0.60598	-0.038
0.6077	0.461		0.607666	0.065		0.607594	0.072		0.607643	-0.043
0.609367	0.46		0.609333	0.058		0.609261	0.08		0.60931	-0.05
0.611038	0.452		0.611835	0.041		0.611763	0.092		0.611813	-0.056
0.612705	0.452		0.613506	0.036		0.613434	0.098		0.612648	-0.058
0.614372	0.443		0.614342	0.036		0.614269	0.112		0.614315	-0.059
0.616039	0.433		0.616005	0.031		0.615932	0.119		0.615978	-0.058
0.617702	0.434		0.617672	0.027		0.617599	0.129		0.617645	-0.057
0.620312	0.435		0.620174	0.015		0.620102	0.138		0.620152	-0.055
0.62104	0.434		0.62101	0.015		0.620937	0.148		0.620983	-0.051
0.622704	0.432		0.622677	0.012		0.622604	0.154		0.62265	-0.049
0.624371	0.431		0.624344	0.012		0.624268	0.161		0.624317	-0.049
0.626034	0.435		0.626007	0.012		0.625935	0.168		0.62598	-0.045
0.627705	0.437		0.628513	0.012		0.627605	0.173		0.628487	-0.038
0.629375	0.436		0.63018	0.012		0.629272	0.18		0.629322	-0.038
0.631039	0.439		0.631016	0.012		0.630939	0.183		0.630985	-0.033
0.632706	0.438		0.632683	0.012		0.632603	0.192		0.632652	-0.032
0.634373	0.435		0.634346	0.012		0.63427	0.198		0.634315	-0.025
0.636875	0.434		0.636852	0.01		0.636772	0.213		0.636822	-0.016
0.637711	0.435		0.637688	0.009		0.638443	0.22		0.637657	-0.016
0.639378	0.433		0.639351	0.006		0.639278	0.22		0.63932	-0.009
0.641041	0.43		0.641018	0.002		0.640942	0.226		0.640987	-0.009
0.642708	0.427		0.642685	-0.007		0.642609	0.236		0.642654	-0.009
0.644379	0.422		0.645187	-0.01		0.645111	0.248		0.645157	-0.006
0.646038	0.422		0.646858	-0.018		0.645947	0.253		0.645992	-0.006
0.647713	0.421		0.64769	-0.027		0.647614	0.253		0.647659	-0.006
0.649368	0.42		0.649357	-0.033		0.649277	0.258		0.649323	-0.008
0.651035	0.423		0.651024	-0.04		0.650944	0.258		0.65099	-0.008
0.653538	0.428		0.653526	-0.047		0.653446	0.262		0.653492	-0.002
0.654373	0.428		0.654362	-0.054		0.654282	0.265		0.654327	-0.003
0.65604	0.427		0.656029	-0.06		0.655949	0.265		0.655994	-0.007
0.657707	0.43		0.657692	-0.066		0.657612	0.257		0.657658	-0.011
0.65937	0.433		0.659359	-0.077		0.659279	0.251		0.659325	-0.016
0.661041	0.432		0.661861	-0.087		0.661781	0.246		0.661831	-0.024
0.662712	0.437		0.662697	-0.098		0.662617	0.239		0.663498	-0.03
0.664375	0.436		0.664364	-0.104		0.664284	0.232		0.664333	-0.04
0.666042	0.436		0.666031	-0.111		0.665947	0.228		0.666	-0.051
0.667706	0.436		0.667694	-0.108		0.667614	0.221		0.667656	-0.062
0.669376	0.432		0.671032	-0.098		0.670116	0.213		0.670162	-0.075
0.671047	0.432		0.672703	-0.087		0.670952	0.202		0.671829	-0.089
0.67271	0.431		0.673538	-0.075		0.672619	0.194		0.672665	-0.098
0.674377	0.428		0.674374	-0.075		0.674282	0.192		0.674332	-0.106
0.676044	0.428		0.676037	-0.065		0.675949	0.188		0.675995	-0.113
0.677711	0.428		0.678543	-0.034		0.678452	0.184		0.678501	-0.118
0.679382	0.421		0.679379	-0.02		0.679287	0.179		0.680172	-0.124
0.681049	0.414		0.681042	-0.02		0.680954	0.18		0.681004	-0.125
0.682713	0.409		0.682709	0.004		0.682617	0.178		0.682671	-0.125
0.68438	0.406		0.684376	0.004		0.684284	0.175		0.684338	-0.123
0.686882	0.402		0.686867	0.023		0.686787	0.171		0.68684	-0.123
0.687717	0.406		0.687702	0.032		0.687622	0.169		0.688511	-0.123
0.689384	0.407		0.689365	0.032		0.689289	0.165		0.689346	-0.123
0.691048	0.412		0.691032	0.055		0.690952	0.162		0.69101	-0.126
0.692715	0.416		0.692699	0.055		0.692619	0.158		0.692677	-0.127
0.695221	0.416		0.694366	0.076		0.69429	0.158		0.695179	-0.137
0.696053	0.416		0.696033	0.084		0.695957	0.153		0.69685	-0.139
0.69772	0.416		0.697701	0.093		0.697624	0.153		0.697685	-0.139
0.699387	0.414		0.699364	0.102		0.699287	0.149		0.699348	-0.144
0.70105	0.414		0.701031	0.105		0.700954	0.144		0.701015	-0.15
0.703556	0.414		0.703533	0.109		0.703457	0.13		0.703522	-0.161
0.704391	0.414		0.704369	0.109		0.704292	0.125		0.705189	-0.159
0.706055	0.408		0.706036	0.113		0.705959	0.125		0.706024	-0.159
0.707722	0.405		0.707703	0.108		0.707623	0.118		0.707691	-0.156
0.709385	0.399		0.709366	0.111		0.70929	0.111		0.709354	-0.156
0.711891	0.392		0.711872	0.112		0.71096	0.097		0.711861	-0.148
0.712727	0.392		0.712704	0.115		0.712627	0.097		0.713528	-0.146
0.71439	0.387		0.714371	0.118		0.714294	0.09		0.714363	-0.146
0.716057	0.381		0.716038	0.121		0.715958	0.086		0.71603	-0.134
0.717724	0.374		0.717701	0.122		0.717625	0.084		0.717693	-0.129
0.720226	0.359		0.719372	0.126		0.719296	0.083		0.7202	-0.121
0.721062	0.359		0.721039	0.131		0.720963	0.085		0.72187	-0.111
0.722729	0.353		0.722702	0.138		0.72263	0.091		0.722702	-0.101
0.724392	0.347		0.724369	0.141		0.724293	0.094		0.724369	-0.093
0.726059	0.343		0.726036	0.146		0.72596	0.096		0.726036	-0.082
0.728561	0.337		0.728539	0.154		0.728462	0.098		0.728539	-0.071
0.729397	0.335		0.729374	0.154		0.729298	0.098		0.730209	-0.067
0.731064	0.335		0.731037	0.159		0.730965	0.098		0.731045	-0.063
0.732727	0.331		0.732704	0.163		0.732628	0.098		0.732708	-0.059
0.734394	0.326		0.734371	0.165		0.734295	0.097		0.734375	-0.056
0.736065	0.313		0.736874	0.163		0.736797	0.095		0.736877	-0.054
0.737732	0.313		0.737709	0.163		0.737625	0.095		0.738548	-0.051
0.739399	0.305		0.739376	0.158		0.739292	0.093		0.739391	-0.049
0.741066	0.3		0.741039	0.15		0.740955	0.09		0.741047	-0.049
0.742729	0.297		0.742706	0.139		0.742622	0.084		0.742714	-0.05
0.745235	0.293		0.744377	0.119		0.745125	0.078		0.74522	-0.056
0.746071	0.287		0.74604	0.119		0.746796	0.071		0.746887	-0.061
0.747734	0.285		0.747707	0.112		0.747631	0.06		0.747723	-0.061
0.749401	0.282		0.749374	0.099		0.749294	0.05		0.74939	-0.063
0.751064	0.282		0.751038	0.093		0.750961	0.041		0.751053	-0.069
0.752735	0.283		0.753544	0.079		0.753464	0.023		0.753559	-0.068
0.754406	0.278		0.754375	0.076		0.755135	0.022		0.755226	-0.069
0.756069	0.276		0.756042	0.076		0.75597	0.022		0.756062	-0.069
0.757736	0.274		0.75771	0.074		0.757633	0.018		0.757729	-0.071
0.759403	0.267		0.759373	0.075		0.7593	0.016		0.759392	-0.071
0.76107	0.262		0.761044	0.078		0.760971	0.009		0.761898	-0.073
0.762741	0.259		0.762711	0.084		0.762638	0.004		0.763569	-0.074
0.764408	0.253		0.764374	0.087		0.764305	0		0.7644	-0.077
0.766071	0.249		0.766041	0.093		0.765968	0.002		0.766068	-0.081
0.767738	0.247		0.767708	0.096		0.767635	0.001		0.767735	-0.081
0.770241	0.247		0.77021	0.099		0.770138	0		0.770237	-0.095
0.771076	0.247		0.771046	0.103		0.770973	0		0.771908	-0.099
0.772743	0.249		0.772713	0.1		0.77264	0		0.772743	-0.099
0.774406	0.254		0.774376	0.1		0.774303	0.001		0.774406	-0.102
0.776073	0.263		0.776043	0.096		0.77597	0		0.776073	-0.104
0.777744	0.267		0.778545	0.096		0.777641	0.003		0.778576	-0.104
0.779411	0.276		0.779381	0.091		0.779308	0.003		0.780247	-0.102
0.781078	0.281		0.781048	0.086		0.780975	0.004		0.781082	-0.102
0.782745	0.289		0.782711	0.082		0.782639	0.007		0.782745	-0.102
0.784409	0.294		0.784378	0.076		0.784306	0.006		0.784412	-0.103
0.786079	0.302		0.78688	0.071		0.786808	0.012		0.786919	-0.103
0.78775	0.302		0.787716	0.066		0.787643	0.017		0.788586	-0.1
0.789413	0.301		0.789383	0.059		0.78931	0.025		0.789421	-0.098
0.79108	0.298		0.79105	0.054		0.790974	0.033		0.791088	-0.099
0.792736	0.298		0.792713	0.047		0.792641	0.043		0.792751	-0.099
0.795242	0.291		0.794384	0.047		0.794312	0.054		0.795258	-0.099
0.796078	0.284		0.796047	0.043		0.795979	0.062		0.796093	-0.097
0.797741	0.28		0.797714	0.042		0.797646	0.078		0.797756	-0.097
0.799408	0.272		0.799381	0.037		0.799309	0.089		0.799423	-0.095
0.801075	0.266		0.801044	0.037		0.800976	0.101		0.801086	-0.092
0.803577	0.257		0.803551	0.028		0.803478	0.114		0.803593	-0.087
0.804413	0.253		0.804386	0.021		0.805149	0.128		0.805264	-0.08
0.80608	0.247		0.806049	0.021		0.805984	0.14		0.806095	-0.08
0.807743	0.243		0.807716	0.012		0.807648	0.153		0.807762	-0.074
0.80941	0.241		0.809383	0.012		0.809315	0.164		0.809429	-0.073
0.811913	0.235		0.81105	0.002		0.810986	0.174		0.811932	-0.07
0.812748	0.236		0.812717	0.002		0.812653	0.179		0.812767	-0.07
0.814415	0.234		0.814384	-0.004		0.81432	0.188		0.814426	-0.074
0.816078	0.233		0.816048	-0.008		0.815983	0.193		0.81609	-0.078
0.817745	0.232		0.817715	-0.008		0.81765	0.199		0.817757	-0.083
0.820251	0.228		0.819382	-0.011		0.819321	0.203		0.820259	-0.103
0.821083	0.223		0.821049	-0.013		0.820988	0.206		0.82193	-0.115
0.82275	0.215		0.822716	-0.013		0.822655	0.207		0.822765	-0.115
0.824417	0.206		0.824379	-0.016		0.824318	0.21		0.824429	-0.137
0.82608	0.199		0.826046	-0.018		0.825985	0.213		0.826096	-0.137
0.828587	0.189		0.827717	-0.023		0.828487	0.216		0.828602	-0.157
0.829422	0.189		0.82938	-0.03		0.829323	0.216		0.829433	-0.167
0.831085	0.186		0.831039	-0.034		0.83099	0.215		0.8311	-0.167
0.832752	0.184		0.832706	-0.043		0.832653	0.209		0.832767	-0.187
0.834415	0.178		0.83437	-0.051		0.83432	0.209		0.834431	-0.187
0.836922	0.174		0.836876	-0.056		0.835991	0.204		0.836937	-0.202
0.837757	0.174		0.837708	-0.058		0.837658	0.204		0.837772	-0.209
0.83942	0.171		0.839375	-0.058		0.839325	0.198		0.839436	-0.209
0.841087	0.174		0.841042	-0.058		0.840988	0.193		0.841103	-0.209
0.842754	0.174		0.842705	-0.057		0.842655	0.192		0.842766	-0.208
0.845257	0.18		0.845211	-0.052		0.845158	0.19		0.845272	-0.204
0.846092	0.182		0.846046	-0.045		0.845993	0.188		0.846107	-0.2
0.847759	0.182		0.84771	-0.035		0.84766	0.186		0.847771	-0.199
0.849422	0.187		0.849377	-0.023		0.849323	0.187		0.849438	-0.198
0.851089	0.191		0.851044	-0.008		0.85099	0.186		0.851105	-0.195
0.853592	0.197		0.853546	0.021		0.853493	0.186		0.853607	-0.193
0.854427	0.197		0.854382	0.021		0.854328	0.188		0.855278	-0.193
0.856094	0.198		0.856049	0.038		0.855995	0.191		0.856113	-0.192
0.857758	0.202		0.857712	0.051		0.857658	0.194		0.857777	-0.193
0.859425	0.199		0.859379	0.064		0.859325	0.198		0.859444	-0.195
0.861931	0.197		0.861881	0.088		0.861828	0.198		0.861946	-0.194
0.862762	0.19		0.862717	0.088		0.862663	0.197		0.863617	-0.196
0.864429	0.19		0.864384	0.1		0.86433	0.196		0.864452	-0.2
0.866096	0.186		0.866047	0.124		0.865993	0.192		0.866116	-0.202
0.86776	0.186		0.867714	0.124		0.867661	0.19		0.867783	-0.205
0.870266	0.183		0.869385	0.146		0.870163	0.183		0.869453	-0.206
0.871101	0.184		0.871052	0.146		0.870998	0.176		0.87112	-0.209
0.872765	0.181		0.872719	0.155		0.872665	0.169		0.872787	-0.213
0.874432	0.18		0.874386	0.163		0.874329	0.165		0.874454	-0.215
0.876099	0.18		0.876049	0.174		0.875996	0.16		0.876118	-0.215
0.877766	0.175		0.878555	0.186		0.878498	0.158		0.878624	-0.21
0.879436	0.168		0.879387	0.188		0.879333	0.158		0.879459	-0.21
0.8811	0.158		0.881054	0.191		0.881001	0.159		0.881123	-0.21
0.882767	0.153		0.882721	0.192		0.882664	0.161		0.88279	-0.213
0.884434	0.147		0.884384	0.194		0.884323	0.163		0.884453	-0.213
0.886936	0.144		0.886055	0.192		0.886826	0.165		0.886959	-0.211
0.887772	0.146		0.887726	0.195		0.887661	0.165		0.88863	-0.214
0.889439	0.146		0.889389	0.196		0.889328	0.168		0.889462	-0.218
0.891102	0.154		0.891056	0.197		0.890991	0.172		0.891129	-0.22
0.892769	0.159		0.892723	0.194		0.892658	0.175		0.892796	-0.22
0.89444	0.162		0.89439	0.189		0.895161	0.18		0.895298	-0.212
0.896107	0.166		0.896057	0.186		0.895996	0.181		0.896969	-0.208
0.897774	0.167		0.897724	0.18		0.897663	0.181		0.897804	-0.204
0.899437	0.169		0.899387	0.174		0.899326	0.182		0.899467	-0.196
0.901104	0.172		0.901054	0.167		0.900993	0.178		0.901134	-0.19
0.90361	0.179		0.903557	0.159		0.903496	0.169		0.903637	-0.181
0.904442	0.179		0.904392	0.15		0.904331	0.162		0.904472	-0.173
0.906109	0.183		0.906059	0.139		0.905998	0.154		0.906139	-0.162
0.907776	0.184		0.907722	0.128		0.907661	0.146		0.907803	-0.155
0.909439	0.184		0.909389	0.117		0.909328	0.135		0.90947	-0.148
0.911945	0.189		0.911892	0.098		0.911831	0.123		0.911976	-0.141
0.912781	0.189		0.912727	0.098		0.912666	0.117		0.912807	-0.133
0.914444	0.196		0.914394	0.093		0.914333	0.108		0.914474	-0.122
0.916111	0.196		0.916061	0.09		0.915997	0.102		0.916142	-0.114
0.917778	0.195		0.917725	0.089		0.917664	0.094		0.917805	-0.108
0.919445	0.199		0.920231	0.089		0.920166	0.09		0.920311	-0.089
0.921116	0.201		0.921066	0.089		0.921001	0.084		0.921146	-0.089
0.922779	0.206		0.922729	0.09		0.922668	0.085		0.92281	-0.08
0.924446	0.205		0.924397	0.095		0.924332	0.086		0.924477	-0.07
0.926113	0.203		0.92606	0.095		0.925999	0.089		0.926144	-0.057
0.928616	0.199		0.927731	0.095		0.928501	0.095		0.928646	-0.03
0.929451	0.196		0.929398	0.095		0.929337	0.1		0.929482	-0.03
0.931118	0.194		0.931061	0.09		0.931004	0.107		0.931145	-0.018
0.932781	0.197		0.932728	0.083		0.932667	0.113		0.932812	-0.007
0.934448	0.196		0.934395	0.083		0.934334	0.118		0.934479	0.005
0.936951	0.198		0.936062	0.078		0.936836	0.116		0.936981	0.02
0.937778	0.201		0.937729	0.078		0.937672	0.116		0.937817	0.02
0.939445	0.203		0.939396	0.076		0.939339	0.111		0.939484	0.027
0.941109	0.21		0.941059	0.065		0.941002	0.111		0.941147	0.034
0.942776	0.213		0.942726	0.058		0.942669	0.106		0.942814	0.035
0.945282	0.223		0.944393	0.049		0.945171	0.093		0.945316	0.032
0.946114	0.223		0.94606	0.04		0.946007	0.093		0.946152	0.027
0.947781	0.222		0.947727	0.035		0.947674	0.088		0.947819	0.027
0.949448	0.223		0.94939	0.023		0.949337	0.074		0.949482	0.021
0.951111	0.222		0.951057	0.016		0.951004	0.074		0.951149	0.016
0.953617	0.222		0.953564	0.006		0.953506	0.056		0.95282	0.013
0.954453	0.222		0.954395	-0.002		0.954342	0.056		0.954487	0.013
0.956116	0.217		0.956062	-0.01		0.956009	0.046		0.956154	0.011
0.957783	0.216		0.957729	-0.015		0.957672	0.032		0.957821	0.006
0.95945	0.213		0.959393	-0.024		0.959339	0.023		0.959476	0.001
0.961952	0.207		0.961899	-0.033		0.961842	0.004		0.961983	0
0.962788	0.2		0.962734	-0.041		0.962677	-0.003		0.962818	-0.004
0.964451	0.2		0.964397	-0.051		0.964344	-0.006		0.964481	-0.01
0.966118	0.197		0.966064	-0.06		0.966007	-0.009		0.966148	-0.015
0.967785	0.195		0.967728	-0.072		0.967674	-0.012		0.967812	-0.019
0.970287	0.192		0.969398	-0.081		0.969345	-0.015		0.970318	-0.023
0.971123	0.192		0.971066	-0.092		0.971012	-0.021		0.971153	-0.028
0.97279	0.192		0.972729	-0.105		0.972679	-0.021		0.972816	-0.034
0.974453	0.192		0.974396	-0.119		0.974342	-0.025		0.974483	-0.043
0.97612	0.192		0.976055	-0.129		0.976009	-0.028		0.976151	-0.051
0.978622	0.192		0.977722	-0.143		0.97768	-0.035		0.978653	-0.06
0.979458	0.195		0.979389	-0.153		0.979355	-0.039		0.979488	-0.075
0.981125	0.197		0.981056	-0.164		0.981014	-0.044		0.981155	-0.084
0.991341	0.232		0.982719	-0.17		0.982677	-0.042		0.982819	-0.094
0.99181	0.232		0.984386	-0.174		0.984344	-0.042		0.984486	-0.105
0.993477	0.242		0.986053	-0.177		0.986847	-0.042		0.986988	-0.114
0.993946	0.248		0.987724	-0.179		0.987682	-0.044		0.987823	-0.123
0.994747	0.248		0.989391	-0.185		0.989349	-0.043		0.989491	-0.131
0.995289	0.248		0.991055	-0.182		0.991013	-0.044		0.991154	-0.137
0.995949	0.253		0.992722	-0.184		0.99268	-0.046		0.992821	-0.143
0.997215	0.253		0.994392	-0.172		0.995182	-0.051		0.995327	-0.153
0.998016	0.258		0.996059	-0.172		0.996017	-0.051		0.996159	-0.153
0.99855	0.258		0.997726	-0.161		0.997684	-0.049		0.997826	-0.156
0.999466	0.259		0.999393	-0.145		0.999348	-0.046		0.999493	-0.156
1.00113	0.259		1.00106	-0.145		1.00101	-0.037		1.00116	-0.157
1.00364	0.259		1.00273	-0.118		1.00352	-0.025		1.00283	-0.156
1.00447	0.256		1.0044	-0.105		1.00435	-0.025		1.0045	-0.158
1.00613	0.254		1.00606	-0.092		1.00602	-0.019		1.00616	-0.157
1.0078	0.248		1.00773	-0.077		1.00768	-0.012		1.00783	-0.159
1.00947	0.244		1.00939	-0.063		1.00935	-0.004		1.00949	-0.16
1.01197	0.235		1.01106	-0.05		1.01185	0.005		1.012	-0.163
1.01281	0.235		1.01273	-0.037		1.01269	0.005		1.01283	-0.163
1.01447	0.231		1.01439	-0.022		1.01435	0.009		1.0145	-0.165
1.01614	0.229		1.01606	-0.016		1.01602	0.017		1.01616	-0.166
1.0178	0.229		1.01773	-0.009		1.01768	0.017		1.01783	-0.166
1.02031	0.232		1.02023	-0.004		1.02019	0.022		1.0195	-0.162
1.02114	0.235		1.02106	0		1.02102	0.021		1.02117	-0.157
1.02281	0.235		1.02273	0.001		1.02269	0.022		1.02283	-0.149
1.02448	0.243		1.02439	0.002		1.02435	0.02		1.0245	-0.142
1.02614	0.243		1.02606	0.004		1.02602	0.022		1.02617	-0.131
1.02781	0.249		1.02856	0.004		1.02769	0.023		1.02867	-0.121
1.02948	0.249		1.0294	0.005		1.02935	0.025		1.03034	-0.112
1.03114	0.254		1.03107	0		1.03102	0.026		1.03117	-0.098
1.03281	0.263		1.03273	-0.003		1.03268	0.026		1.03284	-0.09
1.03447	0.261		1.0344	-0.007		1.03435	0.025		1.0345	-0.079
1.03698	0.262		1.03607	-0.011		1.03685	0.022		1.03617	-0.07
1.03782	0.26		1.03773	-0.011		1.03769	0.022		1.03784	-0.061
1.03948	0.26		1.0394	-0.011		1.03935	0.02		1.03951	-0.051
1.04115	0.26		1.04107	-0.01		1.04102	0.019		1.04118	-0.042
1.04281	0.259		1.04273	-0.004		1.04268	0.019		1.04284	-0.035
1.04531	0.259		1.0444	0.003		1.04519	0.019		1.04535	-0.015
1.04615	0.256		1.04607	0.01		1.04602	0.022		1.04618	-0.015
1.04781	0.257		1.04774	0.021		1.04769	0.028		1.04784	-0.007
1.04948	0.26		1.0494	0.037		1.04935	0.035		1.04951	0.002
1.05115	0.259		1.05107	0.037		1.05102	0.042		1.05118	0.013
1.05281	0.26		1.05357	0.046		1.05352	0.061		1.05285	0.021
1.05449	0.265		1.05441	0.046		1.05436	0.061		1.05452	0.029
1.05615	0.269		1.05607	0.051		1.05602	0.067		1.05618	0.034
1.05782	0.277		1.05774	0.049		1.05769	0.071		1.05785	0.039
1.05948	0.28		1.05941	0.051		1.05935	0.074		1.05951	0.041
1.06115	0.285		1.06107	0.048		1.06102	0.075		1.06202	0.042
1.06282	0.293		1.06274	0.048		1.06269	0.077		1.06285	0.042
1.06448	0.3		1.06441	0.038		1.06436	0.076		1.06452	0.039
1.06615	0.305		1.06607	0.034		1.06602	0.079		1.06618	0.021
1.06781	0.31		1.06774	0.026		1.06769	0.078		1.06785	0.021
1.07032	0.307		1.07024	0.019		1.07019	0.071		1.07035	0
1.07115	0.307		1.07108	0.009		1.07186	0.064		1.07119	-0.01
1.07282	0.298		1.07274	0.001		1.0727	0.064		1.07285	-0.01
1.07449	0.288		1.07441	-0.007		1.07436	0.065		1.07452	-0.036
1.07615	0.275		1.07607	-0.015		1.07603	0.057		1.07618	-0.036
1.07782	0.254		1.07774	-0.019		1.07853	0.045		1.07869	-0.061
1.07949	0.254		1.07941	-0.02		1.07936	0.043		1.07952	-0.075
1.08115	0.24		1.08108	-0.02		1.08103	0.043		1.08119	-0.089
1.08281	0.215		1.08274	-0.022		1.0827	0.035		1.08286	-0.099
1.08448	0.215		1.08441	-0.018		1.08436	0.039		1.08452	-0.111
1.08698	0.195		1.08691	-0.017		1.08686	0.043		1.08702	-0.122
1.08782	0.187		1.08775	-0.013		1.0877	0.048		1.08786	-0.132
1.08948	0.187		1.08941	-0.013		1.08937	0.055		1.08952	-0.139
1.09115	0.175		1.09108	-0.01		1.09103	0.064		1.09119	-0.146
1.09282	0.175		1.09274	-0.009		1.0927	0.073		1.09286	-0.149
1.09532	0.175		1.09525	-0.005		1.0952	0.085		1.09536	-0.149
1.09615	0.176		1.09608	-0.005		1.09604	0.097		1.0962	-0.149
1.09782	0.183		1.09775	-0.002		1.0977	0.11		1.09786	-0.148
1.09948	0.185		1.09941	0		1.09937	0.124		1.09953	-0.15
1.10115	0.19		1.10108	0.002		1.10103	0.134		1.10119	-0.152
1.10365	0.191		1.10275	0.004		1.10353	0.147		1.10369	-0.151
1.10449	0.191		1.10442	0.003		1.10437	0.158		1.10452	-0.154
1.10616	0.194		1.10609	0.006		1.10604	0.17		1.10619	-0.155
1.10782	0.192		1.10775	0.005		1.1077	0.18		1.10785	-0.159
1.10949	0.193		1.10942	0.007		1.10937	0.188		1.10952	-0.16
1.11199	0.197		1.11192	0.011		1.11187	0.193		1.11202	-0.161
1.11282	0.199		1.11275	0.007		1.11271	0.195		1.11286	-0.161
1.11449	0.204		1.11442	0.007		1.11437	0.196		1.11452	-0.157
1.11616	0.21		1.11609	0.01		1.11604	0.196		1.11619	-0.159
1.11782	0.22		1.11775	0.01		1.1177	0.191		1.11786	-0.157
1.12033	0.224		1.12026	0.015		1.1202	0.17		1.12036	-0.145
1.12116	0.231		1.12109	0.018		1.12104	0.17		1.12119	-0.145
1.12283	0.235		1.12275	0.018		1.12271	0.159		1.12286	-0.136
1.12533	0.235		1.12442	0.014		1.12437	0.151		1.12453	-0.126
1.12616	0.235		1.12608	0.015		1.12604	0.143		1.12619	-0.116
1.12867	0.228		1.12775	0.011		1.12854	0.123		1.1287	-0.096
1.1295	0.228		1.12942	0.006		1.12938	0.112		1.12953	-0.088
1.13116	0.222		1.13108	0		1.13104	0.112		1.1312	-0.088
1.13283	0.218		1.13275	-0.002		1.13271	0.096		1.13286	-0.074
1.1345	0.212		1.13441	-0.004		1.13437	0.096		1.13453	-0.074
1.137	0.205		1.13692	-0.011		1.13688	0.082		1.13703	-0.073
1.13784	0.201		1.13776	-0.015		1.13771	0.075		1.13787	-0.073
1.1395	0.201		1.13942	-0.021		1.13938	0.072		1.13953	-0.076
1.14117	0.197		1.14109	-0.027		1.14104	0.064		1.1412	-0.074
1.14283	0.197		1.14275	-0.034		1.14271	0.064		1.14286	-0.071
1.14534	0.197		1.14526	-0.042		1.14437	0.061		1.14537	-0.067
1.14617	0.197		1.14609	-0.049		1.14605	0.057		1.1462	-0.061
1.14784	0.197		1.14776	-0.053		1.14771	0.053		1.14787	-0.053
1.14951	0.202		1.14942	-0.059		1.14938	0.048		1.14953	-0.046
1.15117	0.206		1.15109	-0.062		1.15104	0.041		1.1512	-0.039
1.15368	0.211		1.15359	-0.066		1.15355	0.036		1.1537	-0.03
1.15534	0.216		1.15443	-0.068		1.15438	0.032		1.15454	-0.018
1.15618	0.219		1.15609	-0.07		1.15605	0.027		1.1562	-0.011
1.15784	0.223		1.15776	-0.074		1.15771	0.024		1.15787	-0.001
1.15951	0.221		1.15942	-0.074		1.15938	0.022		1.15953	0.008
1.16201	0.221		1.16109	-0.073		1.16105	0.019		1.16204	0.023
1.16285	0.217		1.16276	-0.07		1.16272	0.016		1.16287	0.023
1.16451	0.218		1.16443	-0.064		1.16438	0.012		1.16454	0.029
1.16618	0.221		1.1661	-0.06		1.16605	0.011		1.16621	0.035
1.16785	0.221		1.16776	-0.054		1.16771	0.014		1.16787	0.039
1.17035	0.226		1.17027	-0.039		1.17022	0.025		1.17038	0.044
1.17118	0.228		1.1711	-0.031		1.17105	0.025		1.17121	0.049
1.17285	0.23		1.17276	-0.031		1.17272	0.034		1.17287	0.054
1.17451	0.232		1.17443	-0.029		1.17437	0.048		1.17454	0.057
1.17618	0.235		1.17609	-0.029		1.17604	0.059		1.17621	0.059
1.17868	0.235		1.17776	-0.031		1.17854	0.083		1.17871	0.06
1.18036	0.236		1.17944	-0.031		1.17938	0.083		1.17955	0.06
1.18119	0.24		1.1811	-0.03		1.18105	0.094		1.18121	0.058
1.18285	0.246		1.18277	-0.029		1.18271	0.101		1.18288	0.055
1.18452	0.247		1.18443	-0.028		1.18438	0.108		1.18454	0.047
1.18702	0.253		1.18694	-0.025		1.18688	0.119		1.18705	0.036
1.18786	0.253		1.18777	-0.024		1.18771	0.122		1.18788	0.03
1.18953	0.259		1.18944	-0.023		1.18938	0.122		1.18955	0.025
1.19119	0.265		1.1911	-0.024		1.19104	0.123		1.19121	0.018
1.19286	0.269		1.19277	-0.022		1.19271	0.128		1.19288	0.018
1.19536	0.277		1.19444	-0.023		1.19521	0.132		1.19538	0.013
1.19619	0.278		1.19611	-0.02		1.19605	0.132		1.19622	0.007
1.19786	0.278		1.19777	-0.019		1.19772	0.132		1.19788	0.01
1.19953	0.276		1.19944	-0.013		1.19938	0.132		1.19955	0.013
1.20119	0.276		1.2011	-0.009		1.20105	0.131		1.20121	0.013
1.20286	0.268		1.20361	-0.006		1.20355	0.128		1.20372	0.019
1.20453	0.268		1.20444	-0.003		1.20438	0.125		1.20455	0.025
1.20619	0.264		1.20611	0.002		1.20605	0.124		1.20622	0.032
1.20786	0.25		1.20778	0.003		1.20771	0.122		1.20789	0.037
1.20953	0.25		1.20944	0.009		1.20938	0.121		1.20955	0.045
1.21119	0.233		1.21194	0.012		1.21188	0.123		1.21206	0.053
1.21286	0.222		1.21278	0.019		1.21272	0.123		1.21372	0.059
1.21453	0.211		1.21444	0.017		1.21439	0.12		1.21456	0.067
1.21619	0.202		1.21611	0.019		1.21605	0.117		1.21622	0.075
1.21786	0.193		1.21778	0.015		1.21772	0.113		1.21789	0.083
1.21952	0.186		1.22028	0.006		1.22022	0.11		1.22039	0.088
1.22119	0.18		1.22112	0.006		1.22105	0.109		1.22123	0.09
1.22286	0.176		1.22278	0		1.22272	0.105		1.2229	0.087
1.22452	0.173		1.22445	-0.005		1.22438	0.1		1.22456	0.086
1.22619	0.173		1.22611	-0.01		1.22605	0.095		1.22623	0.079
1.22786	0.17		1.22778	-0.023		1.22855	0.091		1.22873	0.063
1.22952	0.17		1.22945	-0.023		1.22939	0.092		1.2304	0.063
1.23118	0.171		1.23112	-0.029		1.23106	0.095		1.23124	0.055
1.23285	0.167		1.23278	-0.037		1.23272	0.103		1.2329	0.047
1.23451	0.168		1.23445	-0.037		1.23439	0.104		1.23457	0.036
1.23702	0.169		1.23695	-0.038		1.23689	0.105		1.23707	0.015
1.23785	0.17		1.23779	-0.042		1.23856	0.108		1.2379	0.015
1.23952	0.17		1.23945	-0.042		1.2394	0.108		1.23957	0.005
1.24118	0.17		1.24112	-0.046		1.24106	0.106		1.24124	-0.001
1.24285	0.171		1.24278	-0.052		1.24273	0.106		1.2429	-0.01
1.24535	0.166		1.24529	-0.062		1.24523	0.097		1.24541	-0.023
1.24619	0.166		1.24612	-0.072		1.24606	0.09		1.24624	-0.023
1.24785	0.167		1.24779	-0.074		1.24773	0.09		1.24791	-0.028
1.24952	0.167		1.24945	-0.077		1.24939	0.088		1.24957	-0.039
1.25119	0.164		1.25112	-0.077		1.25106	0.082		1.25123	-0.039
1.25369	0.157		1.25362	-0.076		1.25273	0.074		1.25373	-0.04
1.25452	0.157		1.25446	-0.078		1.2544	0.074		1.25457	-0.04
1.25619	0.147		1.25612	-0.077		1.25607	0.073		1.25623	-0.042
1.25785	0.134		1.25779	-0.078		1.25773	0.07		1.2579	-0.041
1.25952	0.134		1.25946	-0.079		1.2594	0.065		1.25957	-0.041
1.26202	0.124		1.26196	-0.084		1.2619	0.066		1.26207	-0.046
1.26286	0.119		1.26279	-0.087		1.26273	0.065		1.26291	-0.049
1.26453	0.119		1.26446	-0.091		1.2644	0.068		1.26457	-0.054
1.26619	0.115		1.26612	-0.094		1.26606	0.071		1.26624	-0.059
1.26786	0.112		1.26778	-0.097		1.26773	0.07		1.2679	-0.064
1.27036	0.114		1.27029	-0.1		1.27023	0.071		1.2704	-0.071
1.27119	0.111		1.27112	-0.106		1.27107	0.07		1.27124	-0.077
1.27286	0.111		1.27279	-0.109		1.27274	0.07		1.27291	-0.083
1.27453	0.112		1.27445	-0.114		1.2744	0.068		1.27457	-0.091
1.27619	0.109		1.27612	-0.118		1.27607	0.069		1.27624	-0.099
1.2787	0.106		1.27862	-0.122		1.27857	0.065		1.27874	-0.108
1.27953	0.104		1.27946	-0.122		1.2794	0.064		1.27958	-0.113
1.2812	0.101		1.28112	-0.123		1.28107	0.061		1.28124	-0.117
1.28286	0.096		1.28279	-0.123		1.28273	0.061		1.28291	-0.122
1.28453	0.094		1.28445	-0.122		1.2844	0.058		1.28457	-0.126
1.28703	0.09		1.28613	-0.115		1.28607	0.057		1.28708	-0.131
1.28787	0.088		1.28779	-0.115		1.28774	0.054		1.28791	-0.132
1.28953	0.087		1.28946	-0.109		1.28941	0.052		1.28958	-0.133
1.2912	0.088		1.29112	-0.102		1.29107	0.049		1.29124	-0.137
1.29287	0.086		1.29279	-0.092		1.29274	0.047		1.29291	-0.135
1.29537	0.088		1.29529	-0.065		1.29524	0.048		1.29541	-0.131
1.2962	0.089		1.29613	-0.053		1.29607	0.048		1.29625	-0.131
1.29787	0.093		1.29779	-0.053		1.29774	0.051		1.29791	-0.132
1.29953	0.093		1.29946	-0.043		1.2994	0.054		1.29958	-0.126
1.3012	0.097		1.30112	-0.026		1.30107	0.058		1.30125	-0.124
1.3037	0.111		1.30363	-0.02		1.30357	0.058		1.30375	-0.124
1.30454	0.111		1.30446	-0.015		1.30441	0.056		1.30458	-0.124
1.30621	0.124		1.30613	-0.011		1.30608	0.056		1.30625	-0.129
1.30787	0.134		1.30779	-0.007		1.30774	0.055		1.30791	-0.131
1.30954	0.149		1.30946	-0.004		1.30941	0.053		1.30958	-0.131
1.31204	0.177		1.31196	0.001		1.31191	0.05		1.31208	-0.146
1.31287	0.177		1.3128	0.003		1.31274	0.052		1.31292	-0.154
1.31454	0.188		1.31446	0.007		1.31441	0.052		1.31459	-0.154
1.31621	0.2		1.31613	0.012		1.31607	0.054		1.31625	-0.171
1.31787	0.209		1.31779	0.016		1.31774	0.054		1.31792	-0.171
1.32038	0.218		1.3203	0.023		1.31941	0.059		1.32042	-0.187
1.32121	0.218		1.32113	0.029		1.32107	0.062		1.32125	-0.194
1.32288	0.218		1.3228	0.034		1.32274	0.064		1.32292	-0.202
1.32454	0.212		1.32446	0.043		1.3244	0.066		1.32459	-0.207
1.32621	0.212		1.32613	0.051		1.32607	0.067		1.32625	-0.213
1.32788	0.207		1.32864	0.059		1.32857	0.066		1.32876	-0.213
1.32954	0.207		1.32947	0.069		1.32941	0.065		1.32959	-0.216
1.33121	0.202		1.33113	0.076		1.33107	0.069		1.33126	-0.22
1.33287	0.196		1.3328	0.085		1.33274	0.07		1.33292	-0.221
1.33454	0.188		1.33447	0.089		1.3344	0.069		1.33459	-0.216
1.33621	0.185		1.33697	0.102		1.33691	0.066		1.33709	-0.211
1.33788	0.183		1.33781	0.102		1.33774	0.066		1.33793	-0.203
1.33954	0.18		1.33947	0.105		1.33941	0.065		1.33959	-0.193
1.34121	0.183		1.34114	0.106		1.34107	0.063		1.34126	-0.185
1.34287	0.18		1.3428	0.109		1.34274	0.062		1.34293	-0.174
1.34538	0.177		1.34531	0.112		1.34524	0.058		1.34543	-0.164
1.34621	0.177		1.34614	0.113		1.34608	0.058		1.34626	-0.156
1.34788	0.172		1.34781	0.113		1.34774	0.053		1.34793	-0.148
1.34954	0.168		1.34947	0.117		1.34941	0.054		1.34959	-0.143
1.35121	0.162		1.35114	0.117		1.35107	0.052		1.35126	-0.138
1.35371	0.156		1.35364	0.118		1.35358	0.056		1.35376	-0.128
1.35455	0.15		1.35448	0.117		1.35441	0.056		1.3546	-0.128
1.35621	0.142		1.35614	0.117		1.35608	0.059		1.35627	-0.123
1.35788	0.133		1.35781	0.115		1.35774	0.064		1.35793	-0.116
1.35954	0.125		1.35947	0.11		1.35941	0.065		1.3596	-0.112
1.36205	0.118		1.36198	0.099		1.36191	0.065		1.3621	-0.1
1.36288	0.114		1.36281	0.096		1.36275	0.062		1.36293	-0.095
1.36455	0.108		1.36448	0.087		1.36441	0.062		1.3646	-0.095
1.36621	0.105		1.36615	0.083		1.36608	0.062		1.36627	-0.084
1.36788	0.097		1.36781	0.079		1.36774	0.061		1.36793	-0.084
1.36955	0.089		1.37032	0.077		1.37025	0.065		1.37044	-0.083
1.37122	0.082		1.37115	0.076		1.37108	0.066		1.37127	-0.081
1.37288	0.074		1.37281	0.075		1.37275	0.066		1.37294	-0.081
1.37454	0.066		1.37448	0.079		1.37441	0.073		1.3746	-0.077
1.37621	0.058		1.37614	0.083		1.37608	0.086		1.37627	-0.077
1.37871	0.03		1.37865	0.085		1.37858	0.096		1.37877	-0.08
1.37954	0.03		1.37949	0.09		1.37942	0.105		1.37961	-0.08
1.38121	0.019		1.38115	0.093		1.38108	0.116		1.38127	-0.082
1.38287	0.008		1.38282	0.098		1.38275	0.128		1.38294	-0.086
1.38454	0.003		1.38448	0.104		1.38441	0.14		1.38461	-0.093
1.38704	-0.005		1.38699	0.109		1.38692	0.151		1.38711	-0.101
1.38788	-0.002		1.38782	0.113		1.38775	0.159		1.38794	-0.106
1.38955	-0.002		1.38948	0.116		1.38942	0.169		1.38961	-0.116
1.39121	0.008		1.39115	0.116		1.39108	0.174		1.39127	-0.125
1.39288	0.008		1.39282	0.111		1.39275	0.182		1.39294	-0.133
1.39538	0.03		1.39449	0.106		1.39525	0.188		1.39544	-0.141
1.39621	0.04		1.39615	0.101		1.39609	0.195		1.39627	-0.151
1.39788	0.047		1.39782	0.091		1.39775	0.199		1.39794	-0.161
1.39955	0.055		1.39948	0.082		1.39942	0.198		1.3996	-0.173
1.40121	0.065		1.40115	0.07		1.40108	0.198		1.40127	-0.18
1.40372	0.07		1.40365	0.051		1.40359	0.191		1.40377	-0.184
1.40455	0.07		1.40449	0.043		1.40442	0.188		1.40461	-0.189
1.40622	0.074		1.40615	0.043		1.40609	0.18		1.40627	-0.189
1.40788	0.074		1.40782	0.037		1.40775	0.171		1.40794	-0.192
1.40955	0.082		1.40948	0.034		1.40942	0.164		1.4096	-0.19
1.41205	0.086		1.41199	0.034		1.41109	0.157		1.41211	-0.188
1.41289	0.094		1.41282	0.035		1.41276	0.151		1.41294	-0.188
1.41455	0.101		1.41448	0.035		1.41442	0.147		1.41461	-0.183
1.41622	0.112		1.41615	0.037		1.41609	0.147		1.41628	-0.179
1.41788	0.123		1.41781	0.045		1.41776	0.147		1.41794	-0.175
1.42039	0.131		1.42032	0.052		1.41943	0.151		1.42044	-0.165
1.42122	0.14		1.42115	0.053		1.42109	0.157		1.42128	-0.165
1.42289	0.148		1.42282	0.053		1.42276	0.167		1.42294	-0.157
1.42455	0.158		1.42448	0.051		1.42442	0.175		1.42461	-0.146
1.42622	0.172		1.42615	0.048		1.42609	0.184		1.42628	-0.146
1.42872	0.203		1.42865	0.042		1.42859	0.201		1.42891	-0.132
1.42956	0.203		1.42949	0.04		1.42942	0.202		1.42962	-0.126
1.43122	0.218		1.43115	0.036		1.43109	0.202		1.43128	-0.126
1.43289	0.233		1.43282	0.032		1.43275	0.199		1.43295	-0.112
1.43456	0.246		1.43449	0.032		1.43442	0.196		1.43461	-0.112
1.43706	0.272		1.43615	0.028		1.43609	0.19		1.43711	-0.104
1.43789	0.272		1.43782	0.029		1.43776	0.19		1.43795	-0.106
1.43956	0.283		1.43949	0.025		1.43943	0.184		1.43962	-0.106
1.44123	0.292		1.44115	0.023		1.44109	0.184		1.44128	-0.106
1.44289	0.297		1.44282	0.022		1.44276	0.182		1.44295	-0.102
1.4454	0.299		1.44532	0.02		1.44442	0.177		1.44545	-0.104
1.44623	0.295		1.44616	0.018		1.44609	0.17		1.44629	-0.103
1.4479	0.295		1.44782	0.016		1.44776	0.167		1.44795	-0.097
1.44956	0.291		1.44949	0.015		1.44942	0.163		1.44962	-0.095
1.45123	0.28		1.45115	0.012		1.45109	0.157		1.45128	-0.09
1.4529	0.262		1.45366	0.008		1.45364	0.155		1.45379	-0.087
1.45457	0.262		1.45449	0.008		1.45443	0.155		1.45462	-0.084
1.45623	0.255		1.45616	0.004		1.45609	0.154		1.45629	-0.08
1.4579	0.24		1.45782	0.003		1.45776	0.156		1.45795	-0.074
1.45956	0.239		1.45949	0		1.45942	0.16		1.45962	-0.068
1.46207	0.241		1.46199	-0.012		1.46109	0.164		1.46212	-0.056
1.4629	0.241		1.46284	-0.012		1.46276	0.174		1.46296	-0.04
1.46457	0.244		1.46449	-0.019		1.46443	0.18		1.46462	-0.027
1.46623	0.248		1.46616	-0.028		1.46608	0.189		1.46629	-0.009
1.4679	0.251		1.46783	-0.041		1.46775	0.198		1.46796	0.004
1.4704	0.256		1.46949	-0.064		1.47025	0.217		1.47046	0.018
1.47124	0.263		1.47116	-0.064		1.47109	0.217		1.47129	0.033
1.4729	0.265		1.47282	-0.076		1.47276	0.226		1.47296	0.044
1.47457	0.266		1.47449	-0.086		1.47442	0.238		1.47462	0.053
1.47623	0.268		1.47616	-0.096		1.47609	0.248		1.47629	0.065
1.47874	0.268		1.47866	-0.107		1.47859	0.264		1.47879	0.081
1.47958	0.268		1.4795	-0.109		1.47942	0.264		1.47963	0.081
1.48124	0.267		1.48116	-0.114		1.48109	0.265		1.4813	0.096
1.48291	0.265		1.48283	-0.116		1.48275	0.265		1.48296	0.103
1.48457	0.267		1.48449	-0.116		1.48442	0.265		1.48463	0.103
1.48708	0.266		1.487	-0.114		1.48692	0.261		1.48713	0.116
1.48791	0.265		1.48783	-0.114		1.48776	0.258		1.48796	0.118
1.48957	0.263		1.4895	-0.111		1.48943	0.258		1.48963	0.118
1.49124	0.257		1.49117	-0.107		1.49109	0.256		1.4913	0.118
1.4929	0.253		1.49283	-0.102		1.49276	0.252		1.49296	0.118
1.49458	0.25		1.49533	-0.096		1.49526	0.24		1.49547	0.118
1.49624	0.245		1.49617	-0.091		1.49609	0.235		1.4963	0.115
1.49791	0.243		1.49783	-0.086		1.49776	0.235		1.49797	0.115
1.49957	0.237		1.4995	-0.081		1.49942	0.225		1.49963	0.109
1.50124	0.238		1.50116	-0.074		1.50109	0.219		1.5013	0.102
1.50374	0.235		1.50283	-0.069		1.50359	0.214		1.5038	0.097
1.50458	0.233		1.5045	-0.061		1.50443	0.209		1.50464	0.088
1.50624	0.233		1.50616	-0.054		1.5061	0.204		1.5063	0.08
1.50791	0.237		1.50783	-0.046		1.50776	0.2		1.50797	0.072
1.50957	0.237		1.5095	-0.041		1.50943	0.2		1.50964	0.059
1.51208	0.24		1.512	-0.038		1.51193	0.197		1.51214	0.049
1.51291	0.244		1.51284	-0.038		1.51276	0.195		1.51297	0.036
1.51458	0.244		1.5145	-0.039		1.51443	0.19		1.51464	0.024
1.51624	0.244		1.51617	-0.042		1.51609	0.185		1.5163	0.012
1.51791	0.244		1.51783	-0.048		1.51776	0.177		1.51797	0.002
1.51958	0.243		1.52034	-0.056		1.52026	0.169		1.52047	-0.007
1.52124	0.235		1.52117	-0.06		1.5211	0.159		1.52131	-0.013
1.5229	0.223		1.52284	-0.06		1.52277	0.148		1.52298	-0.021
1.52457	0.214		1.5245	-0.066		1.52443	0.136		1.52464	-0.028
1.52623	0.2		1.52617	-0.067		1.5261	0.126		1.52631	-0.03
1.52874	0.186		1.52867	-0.074		1.5286	0.112		1.52881	-0.035
1.53041	0.172		1.52951	-0.075		1.52943	0.099		1.52964	-0.035
1.53124	0.158		1.53117	-0.075		1.5311	0.086		1.53131	-0.035
1.53291	0.143		1.53284	-0.073		1.53276	0.079		1.53298	-0.031
1.53457	0.129		1.5345	-0.072		1.53443	0.069		1.53464	-0.03
1.53708	0.117		1.53701	-0.065		1.53693	0.058		1.53715	-0.029
1.53875	0.105		1.53784	-0.063		1.53777	0.058		1.53798	-0.029
1.53958	0.095		1.53951	-0.059		1.53944	0.056		1.53965	-0.029
1.54125	0.088		1.54118	-0.059		1.5411	0.05		1.54131	-0.029
1.54292	0.078		1.54284	-0.058		1.54277	0.051		1.54297	-0.033
1.54542	0.072		1.54535	-0.056		1.54527	0.06		1.54548	-0.044
1.54709	0.066		1.54618	-0.054		1.5461	0.066		1.54631	-0.044
1.54792	0.061		1.54784	-0.053		1.54777	0.066		1.54797	-0.053
1.54959	0.059		1.54951	-0.053		1.54943	0.068		1.54964	-0.061
1.55125	0.063		1.55118	-0.052		1.5511	0.069		1.55131	-0.061
1.55376	0.073		1.55368	-0.051		1.5536	0.068		1.55381	-0.073
1.55543	0.081		1.55452	-0.045		1.55444	0.061		1.55465	-0.08
1.55626	0.081		1.55618	-0.039		1.55611	0.061		1.55631	-0.08
1.55793	0.09		1.55785	-0.028		1.55777	0.055		1.55798	-0.1
1.55959	0.097		1.55951	-0.021		1.55944	0.038		1.55964	-0.108
1.5621	0.113		1.56201	-0.012		1.56194	0.033		1.56215	-0.115
1.56377	0.116		1.56284	-0.008		1.56277	0.023		1.56298	-0.119
1.5646	0.116		1.56451	-0.002		1.56444	0.017		1.56465	-0.121
1.56627	0.116		1.56617	0		1.5661	0.009		1.56631	-0.119
1.56793	0.112		1.56784	0.003		1.56777	0.007		1.56798	-0.118
1.57044	0.101		1.57034	0.006		1.57027	0.001		1.57048	-0.115
1.57211	0.095		1.57118	0.006		1.57111	-0.006		1.57132	-0.11
1.57294	0.095		1.57285	0.004		1.57278	-0.012		1.57298	-0.106
1.57461	0.086		1.57451	0.006		1.57444	-0.016		1.57465	-0.099
1.57627	0.073		1.57618	0.007		1.57611	-0.023		1.57631	-0.092
1.57878	0.049		1.57868	0.009		1.57861	-0.029		1.57882	-0.088
1.58045	0.033		1.57951	0.009		1.57944	-0.034		1.57965	-0.079
1.58128	0.019		1.58118	0.007		1.58111	-0.036		1.58132	-0.073
1.58295	0.008		1.58285	0.007		1.58278	-0.04		1.58298	-0.065
1.58461	-0.004		1.58451	0.005		1.58444	-0.044		1.58465	-0.056
1.58795	-0.02		1.58702	-0.002		1.58611	-0.047		1.58715	-0.052
1.58879	-0.02		1.58785	-0.012		1.58778	-0.05		1.58799	-0.043
1.5897	-0.024		1.58952	-0.012		1.58944	-0.05		1.58965	-0.033
1.59129	-0.028		1.59118	-0.021		1.59111	-0.056		1.59132	-0.029
1.59295	-0.032		1.59285	-0.033		1.59277	-0.053		1.59299	-0.024
1.59546	-0.038		1.59535	-0.052		1.59528	-0.055		1.59549	-0.026
1.59713	-0.045		1.59619	-0.06		1.59611	-0.055		1.59632	-0.026
1.59796	-0.045		1.59785	-0.06		1.59778	-0.054		1.59799	-0.033
1.59962	-0.051		1.59952	-0.071		1.59944	-0.047		1.59966	-0.048
1.60129	-0.06		1.60118	-0.077		1.60111	-0.042		1.60132	-0.048
1.60463	-0.076		1.60369	-0.079		1.60278	-0.036		1.60382	-0.064
1.60546	-0.082		1.60452	-0.079		1.60444	-0.029		1.60466	-0.075
1.60632	-0.082		1.60619	-0.078		1.60611	-0.023		1.60633	-0.075
1.60797	-0.088		1.60785	-0.071		1.60777	-0.016		1.60799	-0.09
1.60963	-0.092		1.60952	-0.066		1.60944	-0.01		1.60966	-0.09
1.61214	-0.095		1.61202	-0.059		1.61193	-0.006		1.61216	-0.103
1.6138	-0.1		1.61286	-0.056		1.61361	-0.004		1.613	-0.11
1.61464	-0.1		1.61452	-0.048		1.61444	-0.004		1.61466	-0.11
1.61631	-0.102		1.61619	-0.045		1.6161	0.002		1.61633	-0.12
1.61797	-0.105		1.61786	-0.036		1.61777	0.002		1.61799	-0.123
1.62048	-0.11		1.62036	-0.032		1.62027	0.008		1.6205	-0.121
1.62215	-0.113		1.62119	-0.026		1.62111	0.012		1.62133	-0.123
1.62298	-0.113		1.62286	-0.023		1.62278	0.016		1.623	-0.121
1.62465	-0.11		1.62453	-0.017		1.62444	0.025		1.62466	-0.122
1.62631	-0.11		1.62619	-0.013		1.62611	0.033		1.62633	-0.121
1.62881	-0.101		1.6287	-0.001		1.62861	0.045		1.62883	-0.121
1.63049	-0.099		1.62953	-0.001		1.62944	0.056		1.62967	-0.124
1.63132	-0.099		1.6312	0.006		1.63111	0.066		1.63133	-0.132
1.63298	-0.091		1.63286	0.008		1.63277	0.075		1.633	-0.138
1.63465	-0.087		1.63453	0.013		1.63444	0.085		1.63467	-0.146
1.63632	-0.069		1.63703	0.019		1.63694	0.093		1.63717	-0.156
1.63799	-0.069		1.63787	0.019		1.63778	0.104		1.638	-0.161
1.63965	-0.059		1.63953	0.023		1.63945	0.108		1.63967	-0.169
1.64132	-0.049		1.6412	0.025		1.64111	0.111		1.64133	-0.177
1.64298	-0.036		1.64286	0.027		1.64278	0.112		1.643	-0.185
1.64465	-0.029		1.64537	0.034		1.64528	0.112		1.6455	-0.193
1.64632	-0.024		1.6462	0.042		1.64611	0.111		1.64634	-0.199
1.64798	-0.02		1.64787	0.042		1.64778	0.107		1.64801	-0.203
1.64965	-0.013		1.64953	0.046		1.64944	0.1		1.64967	-0.201
1.65131	-0.007		1.6512	0.052		1.65111	0.096		1.65134	-0.2
1.65382	-0.005		1.6537	0.064		1.65361	0.076		1.65384	-0.191
1.65466	-0.004		1.65454	0.071		1.65445	0.076		1.65467	-0.191
1.65632	-0.002		1.6562	0.071		1.65612	0.065		1.65634	-0.182
1.65799	0.002		1.65787	0.075		1.65778	0.053		1.65801	-0.172
1.65965	0.002		1.65953	0.084		1.65945	0.039		1.65967	-0.165
1.66216	0.004		1.66121	0.089		1.66195	0.02		1.66218	-0.147
1.66299	0.006		1.66287	0.089		1.66278	0.02		1.66301	-0.142
1.66465	0.008		1.66454	0.091		1.66445	0.012		1.66468	-0.142
1.66631	0.012		1.6662	0.092		1.66611	0.011		1.66634	-0.123
1.66798	0.013		1.66787	0.09		1.66778	0.009		1.66801	-0.123
1.66965	0.016		1.67037	0.085		1.67028	0.008		1.67051	-0.108
1.67131	0.024		1.67121	0.078		1.67196	0.006		1.67135	-0.099
1.67298	0.032		1.67287	0.071		1.67279	0.006		1.67301	-0.099
1.67464	0.041		1.67454	0.061		1.67445	0.004		1.67468	-0.08
1.67631	0.052		1.6762	0.056		1.67612	0.002		1.67635	-0.08
1.67881	0.072		1.67871	0.04		1.67862	-0.009		1.67897	-0.067
1.67965	0.072		1.67954	0.029		1.67946	-0.014		1.67968	-0.059
1.68132	0.086		1.68121	0.014		1.68113	-0.014		1.68135	-0.052
1.68298	0.1		1.68287	0.005		1.68279	-0.029		1.68301	-0.043
1.68465	0.114		1.68454	-0.005		1.68446	-0.039		1.68468	-0.041
1.68715	0.138		1.68704	-0.013		1.68696	-0.046		1.68718	-0.04
1.68798	0.15		1.68788	-0.022		1.68779	-0.055		1.68801	-0.038
1.68965	0.15		1.68954	-0.031		1.68946	-0.06		1.68968	-0.039
1.69132	0.158		1.69121	-0.036		1.69112	-0.064		1.69134	-0.037
1.69298	0.167		1.69287	-0.041		1.69279	-0.069		1.69301	-0.036
1.69549	0.181		1.69538	-0.044		1.69529	-0.073		1.69551	-0.037
1.69632	0.19		1.69621	-0.044		1.69696	-0.073		1.69635	-0.038
1.69799	0.19		1.69788	-0.041		1.6978	-0.071		1.69801	-0.041
1.69965	0.198		1.69955	-0.04		1.69946	-0.068		1.69968	-0.042
1.70132	0.197		1.70121	-0.034		1.70113	-0.068		1.70134	-0.046
1.70382	0.196		1.70372	-0.018		1.7028	-0.068		1.70385	-0.048
1.70466	0.199		1.70455	-0.018		1.70447	-0.065		1.70469	-0.052
1.70632	0.2		1.70621	-0.013		1.70613	-0.06		1.70635	-0.057
1.70799	0.195		1.70787	-0.003		1.7078	-0.055		1.70802	-0.06
1.70966	0.192		1.70954	0.001		1.70947	-0.051		1.70968	-0.063
1.71216	0.19		1.71204	0.01		1.71113	-0.047		1.71218	-0.074
1.71299	0.192		1.71288	0.013		1.7128	-0.042		1.71302	-0.074
1.71466	0.189		1.71454	0.013		1.71447	-0.037		1.71468	-0.08
1.71632	0.191		1.71621	0.012		1.71613	-0.033		1.71635	-0.084
1.71799	0.193		1.71788	0.014		1.7178	-0.029		1.71802	-0.089
1.72049	0.192		1.72038	0.013		1.7203	-0.012		1.72052	-0.1
1.72133	0.19		1.72121	0.012		1.72114	-0.012		1.72136	-0.109
1.723	0.185		1.72288	0.014		1.72281	-0.009		1.72302	-0.109
1.72466	0.179		1.72454	0.01		1.72447	-0.005		1.72469	-0.126
1.72633	0.172		1.72621	0.012		1.72614	0		1.72635	-0.126
1.72883	0.168		1.72871	0.014		1.72864	0.008		1.72886	-0.131
1.72966	0.167		1.72955	0.019		1.72947	0.009		1.72969	-0.13
1.73133	0.165		1.73122	0.022		1.73114	0.009		1.73136	-0.13
1.733	0.162		1.73288	0.027		1.7328	0.011		1.73302	-0.125
1.73466	0.159		1.73455	0.031		1.73447	0.014		1.73469	-0.117
1.73717	0.153		1.73705	0.032		1.73702	0.021		1.73719	-0.111
1.738	0.153		1.73788	0.036		1.7378	0.023		1.73803	-0.104
1.73967	0.151		1.73955	0.038		1.73947	0.023		1.73969	-0.093
1.74133	0.147		1.74122	0.039		1.74113	0.026		1.74136	-0.085
1.743	0.144		1.74288	0.037		1.7428	0.025		1.74302	-0.077
1.7455	0.138		1.74539	0.039		1.7453	0.034		1.74553	-0.068
1.74634	0.133		1.74622	0.039		1.74614	0.042		1.74636	-0.063
1.748	0.133		1.74789	0.038		1.74781	0.049		1.74803	-0.058
1.74967	0.125		1.74955	0.04		1.74947	0.055		1.74969	-0.055
1.75134	0.118		1.75122	0.041		1.75114	0.065		1.75136	-0.057
1.75384	0.105		1.75372	0.047		1.7528	0.076		1.75386	-0.055
1.75467	0.103		1.75456	0.047		1.75447	0.085		1.7547	-0.056
1.75634	0.103		1.75622	0.047		1.75614	0.096		1.75636	-0.061
1.758	0.102		1.75789	0.048		1.7578	0.106		1.75803	-0.067
1.75967	0.107		1.75956	0.046		1.75946	0.113		1.7597	-0.073
1.76134	0.114		1.76206	0.043		1.76113	0.117		1.7622	-0.08
1.763	0.121		1.76289	0.043		1.7628	0.12		1.76303	-0.088
1.76467	0.129		1.76456	0.039		1.76447	0.123		1.7647	-0.096
1.76633	0.137		1.76622	0.038		1.76613	0.122		1.76637	-0.103
1.768	0.145		1.76789	0.031		1.7678	0.12		1.76803	-0.11
1.76967	0.154		1.77039	0.032		1.7703	0.113		1.77053	-0.118
1.77134	0.162		1.77123	0.032		1.77114	0.105		1.77137	-0.118
1.773	0.165		1.7729	0.032		1.7728	0.095		1.77304	-0.118
1.77467	0.172		1.77456	0.035		1.77447	0.086		1.7747	-0.112
1.77633	0.172		1.77623	0.037		1.77613	0.078		1.77637	-0.104
1.77884	0.172		1.77873	0.043		1.77864	0.062		1.77887	-0.086
1.77967	0.171		1.77956	0.049		1.78031	0.051		1.77971	-0.073
1.78134	0.166		1.78123	0.049		1.78114	0.051		1.78137	-0.073
1.783	0.162		1.7829	0.059		1.78281	0.049		1.78304	-0.047
1.78467	0.159		1.78456	0.065		1.78447	0.043		1.7847	-0.047
1.78717	0.145		1.78707	0.073		1.78614	0.045		1.78637	-0.03
1.78801	0.145		1.7879	0.078		1.78781	0.045		1.78804	-0.03
1.78967	0.134		1.78957	0.087		1.78947	0.05		1.7897	-0.024
1.79134	0.121		1.79123	0.09		1.79114	0.055		1.79137	-0.024
1.79301	0.114		1.7929	0.094		1.79281	0.059		1.79304	-0.021
1.79551	0.096		1.7954	0.093		1.79531	0.07		1.79554	-0.017
1.79634	0.096		1.79624	0.092		1.79615	0.07		1.79638	-0.014
1.79801	0.089		1.7979	0.09		1.79781	0.075		1.79804	-0.013
1.79967	0.076		1.79957	0.087		1.79948	0.077		1.79971	-0.01
1.80134	0.073		1.80124	0.083		1.80114	0.074		1.80137	-0.009
1.80301	0.068		1.80376	0.077		1.80365	0.069		1.80387	-0.011
1.80468	0.068		1.80457	0.075		1.80448	0.064		1.80471	-0.014
1.80634	0.066		1.80624	0.07		1.80614	0.063		1.80638	-0.017
1.80801	0.06		1.8079	0.064		1.80781	0.057		1.80804	-0.023
1.80967	0.054		1.80957	0.054		1.80948	0.055		1.80971	-0.026
1.81134	0.033		1.81207	0.046		1.81198	0.05		1.81221	-0.029
1.813	0.033		1.8129	0.038		1.81282	0.047		1.81305	-0.033
1.81467	0.022		1.81457	0.03		1.81448	0.039		1.81471	-0.04
1.81633	0.005		1.81623	0.025		1.81615	0.035		1.81638	-0.044
1.818	-0.004		1.8179	0.017		1.81781	0.026		1.81804	-0.048
1.8205	-0.012		1.82041	0.004		1.82032	0.021		1.82055	-0.05
1.82134	-0.018		1.82207	-0.005		1.82115	0.011		1.82138	-0.053
1.823	-0.024		1.82291	-0.005		1.82281	0		1.82305	-0.059
1.82467	-0.025		1.82458	-0.009		1.82448	-0.007		1.82471	-0.06
1.82634	-0.026		1.82624	-0.015		1.82615	-0.016		1.82638	-0.062
1.82884	-0.028		1.82875	-0.022		1.82865	-0.025		1.82888	-0.063
1.82967	-0.031		1.82958	-0.024		1.82949	-0.035		1.83055	-0.065
1.83134	-0.029		1.83125	-0.024		1.83115	-0.046		1.83139	-0.065
1.833	-0.028		1.83291	-0.03		1.83282	-0.053		1.83305	-0.065
1.83467	-0.023		1.83458	-0.034		1.83448	-0.061		1.83471	-0.067
1.83717	-0.022		1.83708	-0.049		1.83699	-0.076		1.83722	-0.068
1.83801	-0.018		1.83875	-0.054		1.83782	-0.076		1.83805	-0.068
1.83968	-0.016		1.83958	-0.054		1.83949	-0.087		1.83971	-0.068
1.84134	-0.015		1.84125	-0.076		1.84115	-0.088		1.84138	-0.068
1.84301	-0.016		1.84292	-0.076		1.84282	-0.094		1.84305	-0.068
1.84551	-0.016		1.84542	-0.093		1.84449	-0.098		1.84555	-0.07
1.84634	-0.019		1.84626	-0.094		1.84616	-0.105		1.84639	-0.071
1.84801	-0.022		1.84792	-0.097		1.84782	-0.109		1.84805	-0.071
1.84967	-0.03		1.84959	-0.097		1.84949	-0.115		1.84972	-0.071
1.85134	-0.037		1.85125	-0.097		1.85115	-0.121		1.85138	-0.071
1.85385	-0.048		1.85291	-0.097		1.85282	-0.128		1.85389	-0.068
1.85468	-0.048		1.85458	-0.091		1.85449	-0.128		1.85472	-0.064
1.85635	-0.055		1.85625	-0.086		1.85615	-0.131		1.85639	-0.055
1.85801	-0.06		1.85791	-0.077		1.85782	-0.132		1.85805	-0.045
1.85968	-0.061		1.85958	-0.071		1.85949	-0.128		1.85972	-0.032
1.86135	-0.064		1.86208	-0.065		1.86115	-0.126		1.86222	-0.018
1.86302	-0.067		1.86375	-0.06		1.86282	-0.126		1.86306	-0.003
1.86468	-0.069		1.86459	-0.056		1.8645	-0.12		1.86472	0.012
1.86635	-0.072		1.86625	-0.052		1.86615	-0.111		1.86639	0.025
1.86802	-0.073		1.86792	-0.048		1.86782	-0.094		1.86805	0.041
1.87052	-0.075		1.87042	-0.044		1.87032	-0.081		1.87056	0.054
1.87135	-0.071		1.87209	-0.039		1.87116	-0.069		1.8714	0.063
1.87302	-0.071		1.87292	-0.033		1.87282	-0.058		1.87306	0.072
1.87468	-0.07		1.87459	-0.032		1.87449	-0.039		1.87473	0.078
1.87635	-0.062		1.87626	-0.028		1.87616	-0.024		1.87639	0.082
1.87802	-0.056		1.87876	-0.022		1.87866	-0.008		1.87889	0.083
1.87969	-0.053		1.88043	-0.019		1.87949	0.009		1.88057	0.08
1.88136	-0.046		1.88126	-0.019		1.88116	0.025		1.8814	0.079
1.88302	-0.04		1.88293	-0.018		1.88282	0.041		1.88306	0.075
1.88469	-0.032		1.8846	-0.018		1.88449	0.054		1.88473	0.068
1.88636	-0.027		1.8871	-0.028		1.88616	0.067		1.88723	0.045
1.88802	-0.019		1.88794	-0.028		1.88783	0.075		1.88807	0.045
1.88969	-0.012		1.8896	-0.037		1.88949	0.088		1.88974	0.035
1.89136	-0.005		1.89127	-0.042		1.89116	0.095		1.8914	0.02
1.89302	0		1.89293	-0.049		1.89283	0.102		1.89307	0.013
1.89553	0.004		1.8946	-0.056		1.89449	0.107		1.89557	-0.005
1.89636	0.006		1.89627	-0.056		1.89616	0.112		1.8964	-0.005
1.89803	0.007		1.89794	-0.065		1.89783	0.112		1.89807	-0.009
1.89969	0.007		1.8996	-0.071		1.89949	0.115		1.89974	-0.016
1.90136	0.008		1.90127	-0.075		1.90116	0.117		1.9014	-0.019
1.90386	0.013		1.90377	-0.075		1.90366	0.117		1.90391	-0.021
1.9047	0.013		1.90544	-0.07		1.90449	0.117		1.90474	-0.021
1.90636	0.016		1.90628	-0.068		1.90615	0.117		1.90641	-0.02
1.90803	0.015		1.90794	-0.064		1.90782	0.118		1.90807	-0.012
1.90969	0.015		1.90961	-0.059		1.90949	0.121		1.90974	-0.012
1.91136	0.018		1.91211	-0.052		1.91199	0.13		1.91224	-0.01
1.91303	0.018		1.91295	-0.051		1.91283	0.136		1.91392	-0.009
1.91469	0.02		1.91461	-0.044		1.91449	0.136		1.91474	-0.009
1.91636	0.021		1.91628	-0.04		1.91616	0.148		1.91641	-0.01
1.91803	0.023		1.91794	-0.041		1.91782	0.157		1.91808	-0.012
1.92053	0.024		1.92045	-0.037		1.92033	0.175		1.92058	-0.017
1.92136	0.024		1.92128	-0.039		1.92116	0.181		1.92141	-0.022
1.92303	0.028		1.92295	-0.037		1.92282	0.181		1.92308	-0.031
1.92469	0.028		1.92461	-0.038		1.92449	0.191		1.92474	-0.038
1.92636	0.028		1.92628	-0.036		1.92616	0.19		1.92641	-0.045
1.92886	0.033		1.92878	-0.035		1.92866	0.19		1.92891	-0.054
1.9297	0.033		1.93045	-0.036		1.9295	0.187		1.92975	-0.064
1.93137	0.036		1.93129	-0.034		1.93116	0.19		1.93142	-0.076
1.93303	0.04		1.93295	-0.036		1.93283	0.19		1.93308	-0.089
1.9347	0.048		1.93462	-0.033		1.93449	0.189		1.93475	-0.099
1.9372	0.054		1.93712	-0.032		1.937	0.186		1.93725	-0.107
1.93803	0.058		1.93796	-0.032		1.93783	0.186		1.93808	-0.114
1.9397	0.063		1.93962	-0.031		1.9395	0.182		1.93975	-0.12
1.94137	0.068		1.94129	-0.031		1.94116	0.18		1.94142	-0.126
1.94303	0.073		1.94296	-0.029		1.94283	0.179		1.94308	-0.131
1.9447	0.079		1.94546	-0.02		1.94533	0.176		1.94559	-0.138
1.94637	0.085		1.94629	-0.02		1.94617	0.173		1.94642	-0.143
1.94804	0.09		1.94796	-0.017		1.94783	0.169		1.94809	-0.15
1.9497	0.097		1.94963	-0.013		1.9495	0.162		1.94975	-0.152
1.95137	0.103		1.95129	-0.008		1.95116	0.155		1.95142	-0.154
1.95304	0.111		1.9538	-0.006		1.95367	0.152		1.95397	-0.151
1.9547	0.121		1.95463	-0.012		1.9545	0.144		1.95559	-0.145
1.95637	0.124		1.9563	-0.012		1.95617	0.138		1.95642	-0.145
1.95803	0.133		1.95796	-0.023		1.95783	0.132		1.95809	-0.138
1.95969	0.138		1.95963	-0.023		1.9595	0.125		1.95975	-0.13
1.9622	0.143		1.96213	-0.042		1.962	0.107		1.96226	-0.112
1.96303	0.147		1.9638	-0.054		1.96284	0.107		1.96309	-0.112
1.96469	0.152		1.96463	-0.054		1.9645	0.098		1.96476	-0.103
1.96636	0.155		1.9663	-0.076		1.96617	0.089		1.96642	-0.094
1.96803	0.154		1.96797	-0.084		1.96783	0.078		1.96809	-0.094
1.97053	0.151		1.97047	-0.09		1.9695	0.053		1.97059	-0.097
1.97136	0.151		1.97131	-0.091		1.97117	0.053		1.97143	-0.098
1.97303	0.148		1.97297	-0.092		1.97284	0.04		1.97309	-0.098
1.9747	0.142		1.97464	-0.089		1.9745	0.022		1.97476	-0.101
1.97636	0.138		1.9763	-0.089		1.97617	0.008		1.97643	-0.101
1.97887	0.129		1.97797	-0.085		1.97784	-0.02		1.97892	-0.1
1.9797	0.129		1.97964	-0.082		1.97951	-0.02		1.97975	-0.098
1.98137	0.127		1.98131	-0.079		1.98117	-0.036		1.98142	-0.099
1.98303	0.125		1.98297	-0.078		1.98284	-0.048		1.98309	-0.097
1.9847	0.121		1.98464	-0.077		1.9845	-0.056		1.98475	-0.088
1.98637	0.116		1.98631	-0.075		1.98617	-0.069		1.98726	-0.08
1.98803	0.116		1.98798	-0.071		1.98784	-0.071		1.98809	-0.073
1.9897	0.118		1.98964	-0.071		1.98951	-0.078		1.98975	-0.068
1.99137	0.118		1.99131	-0.067		1.99117	-0.079		1.99142	-0.061
1.99303	0.118		1.99297	-0.061		1.99284	-0.08		1.99308	-0.054
1.9947	0.117		1.99464	-0.054		1.99451	-0.079		1.99559	-0.048
1.99637	0.119		1.99631	-0.048		1.99618	-0.078		1.99726	-0.041
1.99804	0.116		1.99797	-0.043		1.99784	-0.078		1.99809	-0.037
1.9997	0.12		1.99964	-0.037		1.99951	-0.082		1.99976	-0.03
2.00137	0.123		2.0013	-0.027		2.00117	-0.081		2.00143	-0.025
2.00304	0.127		2.00381	-0.014		2.00368	-0.082		2.00393	-0.02
2.0047	0.132		2.00464	-0.014		2.00451	-0.079		2.00476	-0.016
2.00637	0.138		2.00631	-0.007		2.00618	-0.078		2.00643	-0.015
2.00804	0.145		2.00797	-0.004		2.00784	-0.076		2.00809	-0.013
2.0097	0.151		2.00964	0.003		2.00951	-0.076		2.00976	-0.017
2.01221	0.159		2.01131	0.003		2.01118	-0.077		2.01226	-0.021
2.01304	0.167		2.01298	0.007		2.01285	-0.079		2.01394	-0.026
2.01471	0.175		2.01464	0.009		2.01451	-0.078		2.01477	-0.026
2.01637	0.187		2.01631	0.015		2.01618	-0.079		2.01643	-0.029
2.01804	0.196		2.01797	0.015		2.01785	-0.078		2.0181	-0.038
2.02054	0.203		2.01965	0.015		2.02035	-0.078		2.0206	-0.05
2.02137	0.209		2.02131	0.015		2.02118	-0.078		2.02144	-0.05
2.02304	0.219		2.02298	0.018		2.02285	-0.08		2.02311	-0.056
2.02471	0.231		2.02464	0.017		2.02451	-0.075		2.02477	-0.057
2.02637	0.24		2.02631	0.013		2.02618	-0.072		2.02644	-0.058
2.02804	0.248		2.02882	0.008		2.02785	-0.06		2.02894	-0.047
2.02971	0.253		2.02965	0.002		2.02952	-0.06		2.02977	-0.043
2.03138	0.26		2.03131	-0.001		2.03118	-0.052		2.03144	-0.043
2.03304	0.264		2.03298	-0.003		2.03285	-0.043		2.03311	-0.039
2.03471	0.268		2.03465	-0.009		2.03452	-0.029		2.03477	-0.039
2.03721	0.271		2.03715	-0.013		2.03702	-0.005		2.03728	-0.039
2.03804	0.271		2.03799	-0.017		2.03785	-0.005		2.03811	-0.039
2.03971	0.272		2.03965	-0.023		2.03952	0.002		2.03978	-0.039
2.04138	0.274		2.04132	-0.03		2.04118	0.016		2.04144	-0.04
2.04304	0.271		2.04298	-0.036		2.04285	0.038		2.04311	-0.037
2.04471	0.271		2.04549	-0.041		2.04535	0.045		2.04561	-0.038
2.04638	0.271		2.04716	-0.045		2.04619	0.054		2.04645	-0.04
2.04805	0.268		2.04799	-0.049		2.04785	0.058		2.04811	-0.041
2.04971	0.268		2.04966	-0.052		2.04951	0.062		2.04978	-0.045
2.05138	0.271		2.05132	-0.055		2.05118	0.066		2.05145	-0.045
2.05388	0.284		2.05383	-0.059		2.05368	0.071		2.05395	-0.046
2.05471	0.287		2.05466	-0.062		2.05452	0.071		2.05478	-0.046
2.05638	0.288		2.05633	-0.065		2.05618	0.071		2.05645	-0.045
2.05805	0.286		2.05799	-0.064		2.05785	0.073		2.05811	-0.048
2.05971	0.284		2.05966	-0.067		2.05951	0.076		2.05978	-0.046
2.06138	0.277		2.06133	-0.066		2.06202	0.077		2.06228	-0.046
2.06305	0.267		2.063	-0.069		2.06285	0.081		2.06312	-0.048
2.06472	0.252		2.06466	-0.069		2.06451	0.082		2.06479	-0.046
2.06638	0.236		2.06633	-0.068		2.06618	0.088		2.06645	-0.049
2.06805	0.222		2.06799	-0.067		2.06785	0.089		2.06812	-0.046
2.07055	0.208		2.06966	-0.063		2.07035	0.088		2.07062	-0.047
2.07138	0.191		2.07133	-0.063		2.07119	0.09		2.07145	-0.047
2.07305	0.173		2.073	-0.063		2.07285	0.09		2.07312	-0.05
2.07472	0.159		2.07467	-0.061		2.07452	0.089		2.07479	-0.053
2.07638	0.147		2.07633	-0.058		2.07618	0.088		2.07645	-0.054
2.07805	0.137		2.07883	-0.061		2.07869	0.083		2.07896	-0.056
2.07972	0.127		2.07967	-0.066		2.07952	0.083		2.07979	-0.056
2.08139	0.115		2.08133	-0.066		2.08118	0.077		2.08146	-0.057
2.08305	0.107		2.083	-0.074		2.08285	0.073		2.08312	-0.062
2.08472	0.098		2.08467	-0.074		2.08452	0.07		2.08479	-0.065
2.08722	0.085		2.08717	-0.084		2.08702	0.062		2.08646	-0.074
2.08805	0.085		2.08801	-0.087		2.08786	0.062		2.08812	-0.074
2.08972	0.077		2.08967	-0.098		2.08952	0.064		2.08979	-0.078
2.09139	0.069		2.09134	-0.104		2.09119	0.064		2.09145	-0.099
2.09305	0.062		2.093	-0.112		2.09285	0.066		2.09312	-0.099
2.09472	0.053		2.0955	-0.116		2.09536	0.068		2.09562	-0.115
2.09639	0.044		2.09634	-0.119		2.09619	0.068		2.09646	-0.124
2.09806	0.035		2.09801	-0.116		2.09785	0.068		2.09813	-0.124
2.09972	0.029		2.09967	-0.115		2.09952	0.065		2.09979	-0.134
2.10139	0.023		2.10134	-0.113		2.10119	0.065		2.10146	-0.138
2.10388	0.012		2.10301	-0.107		2.10369	0.062		2.10396	-0.146
2.10472	0.012		2.10468	-0.106		2.10453	0.059		2.10479	-0.146
2.10638	0.009		2.10634	-0.102		2.10619	0.057		2.10646	-0.149
2.10805	0.004		2.10801	-0.101		2.10786	0.053		2.10813	-0.146
2.10971	0		2.10967	-0.101		2.10952	0.047		2.10979	-0.139
2.11139	-0.008		2.11218	-0.098		2.11203	0.047		2.1123	-0.135
2.11305	-0.008		2.11301	-0.093		2.11286	0.041		2.11313	-0.129
2.11472	-0.01		2.11468	-0.087		2.11452	0.037		2.1148	-0.122
2.11638	-0.009		2.11634	-0.082		2.11619	0.033		2.11646	-0.115
2.11805	-0.009		2.11801	-0.079		2.11786	0.031		2.11813	-0.108
2.11972	-0.014		2.11968	-0.075		2.12036	0.024		2.12063	-0.1
2.12139	-0.015		2.12135	-0.071		2.1212	0.019		2.12147	-0.094
2.12305	-0.017		2.12301	-0.071		2.12286	0.014		2.12313	-0.087
2.12472	-0.02		2.12468	-0.067		2.12453	0.011		2.12479	-0.087
2.12638	-0.024		2.12635	-0.065		2.12619	0.007		2.12646	-0.086
2.12889	-0.029		2.12801	-0.062		2.12786	0.005		2.12896	-0.088
2.12972	-0.03		2.12968	-0.064		2.12953	0.002		2.1298	-0.092
2.13139	-0.034		2.13135	-0.067		2.1312	0		2.13146	-0.09
2.13305	-0.04		2.13301	-0.074		2.13286	0		2.13313	-0.092
2.13472	-0.044		2.13468	-0.079		2.13453	0		2.13479	-0.094
2.13639	-0.046		2.13635	-0.089		2.1362	-0.003		2.13729	-0.1
2.13805	-0.049		2.13802	-0.089		2.13787	-0.005		2.13813	-0.1
2.13972	-0.055		2.13969	-0.094		2.13953	-0.009		2.1398	-0.101
2.14138	-0.061		2.14135	-0.103		2.1412	-0.011		2.14146	-0.106
2.14305	-0.064		2.14301	-0.103		2.14286	-0.012		2.14313	-0.108
2.14555	-0.065		2.14468	-0.108		2.14453	-0.011		2.14563	-0.103
2.14639	-0.065		2.14635	-0.11		2.1462	-0.011		2.14647	-0.103
2.14806	-0.066		2.14801	-0.11		2.14787	-0.009		2.14813	-0.097
2.14972	-0.066		2.14968	-0.109		2.14953	-0.004		2.1498	-0.088
2.15139	-0.06		2.15134	-0.106		2.1512	-0.003		2.15146	-0.088
2.15389	-0.054		2.15385	-0.102		2.1537	0.007		2.15397	-0.081
2.15472	-0.054		2.15468	-0.099		2.15454	0.007		2.1548	-0.081
2.15639	-0.051		2.15635	-0.096		2.1562	0.014		2.15647	-0.08
2.15805	-0.045		2.15802	-0.093		2.15787	0.023		2.15813	-0.085
2.15972	-0.038		2.15968	-0.091		2.15953	0.028		2.1598	-0.085
2.16222	-0.026		2.16135	-0.088		2.16204	0.042		2.1623	-0.094
2.16306	-0.026		2.16302	-0.088		2.16287	0.053		2.16314	-0.101
2.16473	-0.022		2.16468	-0.089		2.16454	0.062		2.1648	-0.108
2.16639	-0.014		2.16635	-0.088		2.1662	0.071		2.16647	-0.118
2.16806	-0.006		2.16802	-0.093		2.16787	0.08		2.16814	-0.127
2.17056	0.011		2.16969	-0.092		2.17037	0.091		2.17064	-0.136
2.17139	0.011		2.17136	-0.092		2.17121	0.096		2.17147	-0.148
2.17306	0.019		2.17302	-0.094		2.17287	0.104		2.17314	-0.152
2.17472	0.028		2.17469	-0.095		2.17454	0.108		2.1748	-0.152
2.17639	0.049		2.17635	-0.095		2.1762	0.114		2.17647	-0.149
2.17889	0.055		2.17802	-0.094		2.17871	0.119		2.17897	-0.146
2.17973	0.063		2.17969	-0.094		2.17954	0.124		2.17981	-0.141
2.1814	0.068		2.18136	-0.099		2.18121	0.126		2.18148	-0.135
2.18306	0.073		2.18302	-0.099		2.18288	0.129		2.18314	-0.125
2.18473	0.075		2.18469	-0.099		2.18454	0.127		2.18481	-0.118
2.1864	0.07		2.18719	-0.101		2.18705	0.126		2.18731	-0.106
2.18806	0.072		2.18803	-0.101		2.18788	0.128		2.18814	-0.093
2.18973	0.072		2.18969	-0.101		2.18954	0.13		2.18981	-0.084
2.19139	0.073		2.19136	-0.099		2.19121	0.13		2.19148	-0.071
2.19306	0.073		2.19302	-0.099		2.19287	0.131		2.19314	-0.061
2.19556	0.072		2.19469	-0.099		2.19537	0.131		2.19481	-0.045
2.1964	0.07		2.19636	-0.099		2.19621	0.131		2.19648	-0.045
2.19806	0.066		2.19803	-0.095		2.19787	0.13		2.19814	-0.04
2.19973	0.059		2.1997	-0.097		2.19954	0.13		2.19981	-0.034
2.20139	0.057		2.20136	-0.097		2.20121	0.128		2.20147	-0.027
2.20391	0.052		2.20387	-0.105		2.20371	0.133		2.20314	-0.016
2.20474	0.051		2.20471	-0.112		2.20454	0.133		2.20481	-0.003
2.2064	0.048		2.20636	-0.116		2.20621	0.136		2.20648	0.005
2.20806	0.043		2.20803	-0.123		2.20787	0.14		2.20815	0.014
2.20973	0.041		2.2097	-0.131		2.20954	0.14		2.20981	0.022
2.21223	0.035		2.21136	-0.14		2.21204	0.14		2.21231	0.034
2.21307	0.035		2.21304	-0.144		2.21288	0.141		2.21315	0.034
2.21473	0.032		2.2147	-0.149		2.21455	0.141		2.21482	0.038
2.2164	0.033		2.21637	-0.151		2.21621	0.138		2.21648	0.041
2.21806	0.029		2.21803	-0.151		2.21788	0.137		2.21815	0.041
2.22057	0.026		2.22054	-0.145		2.22038	0.134		2.22065	0.039
2.2214	0.023		2.22137	-0.14		2.22121	0.13		2.22149	0.037
2.22307	0.023		2.22304	-0.133		2.22288	0.128		2.22315	0.037
2.22473	0.023		2.2247	-0.126		2.22455	0.127		2.22482	0.036
2.2264	0.018		2.22637	-0.116		2.22621	0.125		2.22648	0.037
2.2289	0.017		2.22804	-0.112		2.22872	0.125		2.22815	0.038
2.22974	0.017		2.22971	-0.106		2.22955	0.12		2.22982	0.04
2.2314	0.017		2.23137	-0.104		2.23122	0.118		2.23149	0.04
2.23307	0.02		2.23304	-0.1		2.23288	0.115		2.23315	0.04
2.23473	0.019		2.2347	-0.103		2.23455	0.108		2.23482	0.044
2.2364	0.029		2.23721	-0.109		2.23705	0.106		2.23732	0.045
2.23807	0.036		2.23804	-0.109		2.23789	0.101		2.23816	0.047
2.23974	0.044		2.23971	-0.11		2.23955	0.096		2.23982	0.05
2.2414	0.05		2.24137	-0.11		2.24122	0.092		2.24149	0.051
2.24307	0.056		2.24304	-0.114		2.24289	0.09		2.24315	0.053
2.24557	0.063		2.24554	-0.113		2.24539	0.089		2.24482	0.052
2.24641	0.07		2.24638	-0.113		2.24622	0.09		2.24649	0.053
2.24807	0.072		2.24804	-0.112		2.24789	0.086		2.24816	0.051
2.24973	0.073		2.24971	-0.11		2.24955	0.089		2.24982	0.049
2.2514	0.074		2.25138	-0.11		2.25122	0.09		2.25149	0.046
2.2539	0.076		2.25388	-0.11		2.25372	0.098		2.25399	0.041
2.25473	0.078		2.25471	-0.113		2.25456	0.098		2.25483	0.041
2.2564	0.079		2.25638	-0.113		2.25623	0.103		2.2565	0.035
2.25806	0.081		2.25805	-0.114		2.25789	0.103		2.25816	0.026
2.25973	0.083		2.25971	-0.114		2.25956	0.107		2.25983	0.018
2.26223	0.081		2.26221	-0.111		2.26206	0.107		2.26149	0
2.26307	0.081		2.26305	-0.109		2.26289	0.107		2.26316	0
2.26474	0.083		2.26472	-0.109		2.26456	0.108		2.26483	-0.009
2.2664	0.078		2.26638	-0.1		2.26623	0.11		2.26649	-0.022
2.26807	0.077		2.26805	-0.093		2.26789	0.113		2.26816	-0.037
2.27057	0.074		2.27055	-0.085		2.2704	0.118		2.27065	-0.063
2.2714	0.074		2.27139	-0.078		2.27123	0.118		2.27149	-0.063
2.27307	0.075		2.27305	-0.068		2.2729	0.121		2.27316	-0.073
2.27473	0.077		2.27472	-0.062		2.27456	0.127		2.27482	-0.085
2.2764	0.081		2.27638	-0.055		2.27623	0.133		2.27649	-0.085
2.27807	0.084		2.27889	-0.049		2.27873	0.142		2.27816	-0.097
2.27974	0.09		2.27972	-0.044		2.27957	0.144		2.27982	-0.097
2.28141	0.094		2.28139	-0.043		2.28123	0.149		2.28149	-0.11
2.28307	0.1		2.28305	-0.041		2.2829	0.152		2.28315	-0.114
2.28474	0.106		2.28472	-0.044		2.28456	0.154		2.28482	-0.123
2.28641	0.113		2.28722	-0.045		2.28707	0.158		2.28732	-0.133
2.28807	0.113		2.28805	-0.05		2.2879	0.156		2.28816	-0.142
2.28974	0.118		2.28971	-0.056		2.28957	0.158		2.28982	-0.151
2.2914	0.128		2.29138	-0.064		2.29123	0.153		2.29149	-0.157
2.29307	0.132		2.29305	-0.07		2.2929	0.151		2.29316	-0.166
2.29557	0.136		2.29555	-0.09		2.2954	0.137		2.29566	-0.172
2.29641	0.136		2.29639	-0.09		2.29624	0.127		2.29649	-0.178
2.29808	0.138		2.29805	-0.097		2.2979	0.113		2.29816	-0.183
2.29974	0.152		2.29972	-0.104		2.29957	0.101		2.29982	-0.183
2.30141	0.158		2.30138	-0.107		2.30124	0.082		2.30149	-0.188
2.30308	0.16		2.30389	-0.123		2.30374	0.069		2.30399	-0.184
2.30474	0.157		2.30472	-0.123		2.30457	0.056		2.30483	-0.179
2.30641	0.155		2.30639	-0.132		2.30624	0.042		2.3065	-0.172
2.30807	0.148		2.30805	-0.135		2.30791	0.029		2.30816	-0.161
2.30974	0.141		2.30972	-0.143		2.30957	0.017		2.30983	-0.154
2.31141	0.13		2.31222	-0.147		2.31208	-0.011		2.31233	-0.127
2.31307	0.122		2.31306	-0.146		2.31291	-0.011		2.31316	-0.127
2.31474	0.112		2.31472	-0.146		2.31458	-0.023		2.31483	-0.113
2.3164	0.107		2.31639	-0.141		2.31624	-0.032		2.3165	-0.099
2.31807	0.103		2.31805	-0.141		2.31791	-0.042		2.31816	-0.086
2.32057	0.101		2.32056	-0.13		2.32041	-0.056		2.32067	-0.066
2.32141	0.098		2.32139	-0.122		2.32125	-0.056		2.3215	-0.066
2.32307	0.098		2.32306	-0.117		2.32291	-0.058		2.32317	-0.061
2.32474	0.095		2.32473	-0.109		2.32458	-0.061		2.32483	-0.056
2.3264	0.1		2.32639	-0.106		2.32624	-0.062		2.3265	-0.054
2.32808	0.1		2.3289	-0.099		2.32875	-0.07		2.329	-0.047
2.32974	0.104		2.32973	-0.092		2.32958	-0.07		2.32984	-0.042
2.33141	0.103		2.33139	-0.087		2.33125	-0.075		2.3315	-0.042
2.33307	0.098		2.33306	-0.086		2.33291	-0.082		2.33317	-0.041
2.33474	0.092		2.33473	-0.082		2.33458	-0.086		2.33484	-0.041
2.33641	0.085		2.33723	-0.076		2.33708	-0.108		2.33734	-0.043
2.33807	0.072		2.33807	-0.07		2.33792	-0.117		2.33817	-0.043
2.33974	0.06		2.33973	-0.06		2.33958	-0.124		2.33984	-0.045
2.3414	0.046		2.3414	-0.056		2.34124	-0.132		2.3415	-0.05
2.34307	0.031		2.34306	-0.046		2.34291	-0.137		2.34317	-0.054
2.34557	0.006		2.34557	-0.039		2.34458	-0.143		2.34567	-0.059
2.34641	0.006		2.3464	-0.029		2.34624	-0.139		2.34651	-0.061
2.34807	0		2.34807	-0.024		2.34791	-0.139		2.34818	-0.061
2.34974	-0.007		2.34973	-0.016		2.34958	-0.132		2.34984	-0.062
2.3514	-0.012		2.3514	-0.008		2.35124	-0.129		2.35151	-0.058
2.3539	-0.019		2.3539	-0.004		2.35375	-0.122		2.35401	-0.058
2.35474	-0.019		2.35474	-0.004		2.35458	-0.117		2.35484	-0.053
2.35641	-0.019		2.3564	-0.008		2.35625	-0.107		2.35651	-0.05
2.35807	-0.02		2.35807	-0.013		2.35791	-0.093		2.35818	-0.051
2.35974	-0.021		2.35973	-0.022		2.35958	-0.084		2.35984	-0.047
2.36224	-0.011		2.36224	-0.043		2.36208	-0.071		2.36235	-0.047
2.36308	-0.003		2.36307	-0.043		2.36292	-0.059		2.36318	-0.049
2.36474	0.001		2.36474	-0.055		2.36458	-0.046		2.36485	-0.049
2.36641	0.006		2.36641	-0.067		2.36625	-0.032		2.36651	-0.047
2.36807	0.011		2.36807	-0.081		2.36792	-0.02		2.36818	-0.041
2.37057	0.015		2.37057	-0.102		2.37042	0		2.37068	-0.044
2.37141	0.019		2.37141	-0.11		2.37125	0		2.37152	-0.044
2.37308	0.021		2.37307	-0.11		2.37292	0.01		2.37318	-0.041
2.37474	0.02		2.37474	-0.134		2.37458	0.021		2.37485	-0.043
2.37641	0.019		2.37641	-0.134		2.37625	0.033		2.37651	-0.043
2.37891	0.019		2.37891	-0.154		2.37875	0.051		2.37902	-0.037
2.37975	0.018		2.37975	-0.166		2.37959	0.051		2.37985	-0.037
2.38141	0.017		2.38141	-0.172		2.38126	0.054		2.38152	-0.034
2.38308	0.013		2.38308	-0.179		2.38292	0.06		2.38318	-0.03
2.38474	0.009		2.38474	-0.181		2.38459	0.06		2.38485	-0.023
2.38725	0.01		2.38725	-0.185		2.38709	0.064		2.38735	-0.013
2.38808	0.008		2.38808	-0.182		2.38792	0.064		2.38819	-0.009
2.38975	0.006		2.38975	-0.178		2.38959	0.066		2.38985	-0.009
2.39141	0.004		2.39141	-0.175		2.39126	0.067		2.39152	0.003
2.39308	0.003		2.39308	-0.172		2.39292	0.073		2.39318	0.003
2.39474	0.004		2.39558	-0.165		2.39543	0.083		2.39569	0.021
2.3964	0		2.39642	-0.16		2.39626	0.087		2.39652	0.029
2.39807	0		2.39808	-0.149		2.39793	0.093		2.39819	0.029
2.39973	-0.001		2.39975	-0.139		2.39959	0.099		2.39986	0.048
2.4014	0		2.40141	-0.13		2.40126	0.108		2.40152	0.054
2.4039	0.003		2.40392	-0.12		2.40376	0.113		2.40403	0.061
2.40474	0.003		2.40475	-0.11		2.4046	0.115		2.40486	0.065
2.40641	0.005		2.40642	-0.104		2.40626	0.118		2.40652	0.07
2.40807	0.005		2.40808	-0.094		2.40793	0.121		2.40819	0.071
2.40974	0.01		2.40975	-0.089		2.4096	0.129		2.40985	0.069
2.41224	0.007		2.41225	-0.078		2.4121	0.131		2.41236	0.067
2.41307	0.007		2.41309	-0.078		2.41293	0.138		2.4132	0.061
2.41474	0.007		2.41475	-0.074		2.4146	0.139		2.41486	0.055
2.4164	0.006		2.41642	-0.07		2.41626	0.143		2.41652	0.045
2.41807	0.01		2.41809	-0.067		2.41793	0.144		2.41819	0.034
2.42057	0.012		2.42059	-0.063		2.42043	0.144		2.42069	0.024
2.42141	0.012		2.42142	-0.063		2.42127	0.14		2.42152	0.01
2.42308	0.017		2.42309	-0.063		2.42294	0.134		2.42319	-0.001
2.42474	0.019		2.42476	-0.06		2.4246	0.125		2.42485	-0.015
2.42641	0.019		2.42642	-0.057		2.42627	0.113		2.42652	-0.028
2.42808	0.018		2.42892	-0.047		2.42877	0.09		2.42819	-0.044
2.42974	0.015		2.42976	-0.043		2.4296	0.09		2.42986	-0.059
2.43141	0.009		2.43143	-0.043		2.43127	0.08		2.43152	-0.074
2.43307	0.002		2.43309	-0.037		2.43294	0.07		2.43319	-0.089
2.43474	-0.002		2.43475	-0.037		2.4346	0.064		2.43485	-0.103
2.43724	-0.011		2.43725	-0.027		2.43711	0.053		2.43736	-0.124
2.43808	-0.017		2.43809	-0.023		2.43794	0.053		2.43819	-0.124
2.43975	-0.024		2.43975	-0.014		2.43961	0.047		2.43986	-0.133
2.44141	-0.029		2.44142	-0.01		2.44127	0.045		2.44152	-0.142
2.44308	-0.038		2.44308	-0.003		2.44294	0.044		2.44319	-0.15
2.44558	-0.044		2.44559	0.001		2.44544	0.051		2.44486	-0.167
2.44641	-0.047		2.44642	0.011		2.44628	0.057		2.44653	-0.167
2.44808	-0.052		2.44809	0.016		2.44794	0.057		2.44819	-0.172
2.44975	-0.054		2.44976	0.019		2.44961	0.063		2.44986	-0.183
2.45141	-0.052		2.45142	0.024		2.45127	0.069		2.45152	-0.183
2.45391	-0.054		2.45393	0.029		2.45378	0.084		2.45403	-0.196
2.45475	-0.054		2.45476	0.03		2.45461	0.084		2.45486	-0.196
2.45642	-0.052		2.45642	0.029		2.45628	0.092		2.45652	-0.203
2.45808	-0.053		2.45809	0.028		2.45794	0.099		2.45819	-0.206
2.45975	-0.056		2.45976	0.024		2.45961	0.1		2.45986	-0.211
2.46142	-0.06		2.46143	0.022		2.46211	0.101		2.46236	-0.215
2.46309	-0.065		2.46309	0.018		2.46295	0.098		2.4632	-0.217
2.46475	-0.071		2.46476	0.017		2.46461	0.099		2.46486	-0.221
2.46642	-0.077		2.46642	0.013		2.46628	0.099		2.46653	-0.224
2.46808	-0.08		2.46809	0.01		2.46795	0.101		2.46819	-0.225
2.47058	-0.09		2.47059	0		2.47045	0.105		2.4707	-0.23
2.47142	-0.095		2.47143	0		2.47128	0.109		2.47153	-0.23
2.47309	-0.095		2.47309	-0.005		2.47295	0.114		2.4732	-0.234
2.47475	-0.1		2.47476	-0.01		2.47462	0.119		2.47486	-0.235
2.47642	-0.106		2.47643	-0.017		2.47628	0.125		2.47653	-0.23
2.47809	-0.109		2.4781	-0.024		2.47795	0.136		2.47903	-0.231
2.47976	-0.109		2.47976	-0.033		2.47962	0.141		2.47987	-0.23
2.48142	-0.112		2.48143	-0.039		2.48128	0.151		2.48153	-0.224
2.48309	-0.109		2.48309	-0.053		2.48295	0.158		2.4832	-0.225
2.48475	-0.106		2.48476	-0.061		2.48462	0.163		2.48486	-0.222
2.48642	-0.103		2.48643	-0.081		2.48711	0.166		2.48737	-0.217
2.48809	-0.102		2.48809	-0.081		2.48795	0.171		2.4882	-0.217
2.48976	-0.099		2.48976	-0.09		2.48961	0.169		2.48987	-0.211
2.49142	-0.095		2.49142	-0.1		2.49128	0.172		2.49154	-0.207
2.49309	-0.093		2.49309	-0.11		2.49294	0.173		2.4932	-0.207
2.49559	-0.09		2.49476	-0.129		2.49545	0.178		2.4957	-0.209
2.49643	-0.087		2.49643	-0.129		2.49628	0.178		2.49654	-0.209
2.49809	-0.08		2.49809	-0.138		2.49795	0.183		2.4982	-0.212
2.49976	-0.08		2.49976	-0.146		2.49961	0.185		2.49987	-0.216
2.50142	-0.076		2.50142	-0.156		2.50128	0.187		2.50154	-0.221
2.50309	-0.078		2.50393	-0.162		2.50378	0.184		2.50404	-0.229
2.50476	-0.077		2.50476	-0.163		2.50462	0.178		2.50488	-0.229
2.50642	-0.073		2.50643	-0.165		2.50628	0.178		2.50654	-0.226
2.50809	-0.072		2.50809	-0.166		2.50795	0.172		2.50821	-0.219
2.50975	-0.07		2.50976	-0.167		2.50961	0.164		2.50987	-0.219
2.51143	-0.069		2.51226	-0.165		2.51212	0.144		2.51237	-0.211
2.51309	-0.064		2.5131	-0.162		2.51295	0.135		2.51321	-0.206
2.51476	-0.06		2.51476	-0.158		2.51462	0.135		2.51488	-0.206
2.51642	-0.056		2.51643	-0.156		2.51628	0.123		2.51654	-0.194
2.51809	-0.054		2.51809	-0.153		2.51795	0.115		2.51821	-0.188
2.52059	-0.042		2.51976	-0.144		2.52045	0.102		2.52071	-0.183
2.52142	-0.042		2.52143	-0.141		2.52129	0.097		2.52155	-0.179
2.52309	-0.037		2.52309	-0.132		2.52295	0.095		2.52321	-0.177
2.52475	-0.03		2.52476	-0.127		2.52462	0.091		2.52488	-0.173
2.52642	-0.02		2.52642	-0.125		2.52628	0.091		2.52654	-0.175
2.52809	0.002		2.52893	-0.122		2.52879	0.09		2.52905	-0.176
2.52975	0.002		2.52977	-0.122		2.52962	0.092		2.52988	-0.18
2.53142	0.01		2.53143	-0.12		2.53129	0.095		2.53155	-0.191
2.53308	0.016		2.5331	-0.12		2.53296	0.1		2.53321	-0.202
2.53475	0.024		2.53476	-0.118		2.53462	0.104		2.53488	-0.212
2.53725	0.04		2.53643	-0.119		2.53712	0.105		2.53738	-0.222
2.53809	0.05		2.5381	-0.123		2.53796	0.108		2.53822	-0.229
2.53976	0.055		2.53976	-0.126		2.53963	0.108		2.53988	-0.233
2.54141	0.064		2.54143	-0.127		2.54129	0.106		2.54155	-0.238
2.54308	0.076		2.54309	-0.128		2.54296	0.103		2.54322	-0.241
2.54475	0.085		2.5456	-0.126		2.54546	0.101		2.54572	-0.243
2.54642	0.093		2.54643	-0.126		2.5463	0.095		2.54655	-0.243
2.54808	0.102		2.5481	-0.123		2.54796	0.091		2.54822	-0.24
2.54975	0.112		2.54976	-0.118		2.54963	0.081		2.54988	-0.235
2.55141	0.118		2.55143	-0.118		2.55129	0.077		2.55155	-0.228
2.55309	0.122		2.55393	-0.109		2.5538	0.063		2.55405	-0.208
2.55475	0.123		2.55477	-0.105		2.55463	0.063		2.55489	-0.208
2.55642	0.121		2.55643	-0.105		2.5563	0.06		2.55656	-0.197
2.55808	0.121		2.5581	-0.098		2.55796	0.055		2.55822	-0.184
2.55975	0.119		2.55976	-0.098		2.55963	0.05		2.55989	-0.172
2.56142	0.12		2.56227	-0.086		2.56213	0.049		2.56156	-0.158
2.56308	0.121		2.5631	-0.079		2.56297	0.049		2.56321	-0.143
2.56475	0.119		2.56477	-0.072		2.56463	0.048		2.56488	-0.131
2.56641	0.121		2.56644	-0.061		2.5663	0.046		2.56655	-0.117
2.56808	0.124		2.5681	-0.055		2.56797	0.05		2.56821	-0.117
2.57058	0.135		2.57061	-0.046		2.57047	0.056		2.57072	-0.103
2.57142	0.135		2.57144	-0.042		2.5713	0.061		2.57155	-0.094
2.57309	0.141		2.5731	-0.036		2.57297	0.061		2.57322	-0.094
2.57475	0.146		2.57477	-0.03		2.57463	0.061		2.57488	-0.086
2.57642	0.152		2.57644	-0.022		2.5763	0.062		2.57655	-0.086
2.57892	0.164		2.57894	-0.016		2.5788	0.06		2.57905	-0.085
2.57975	0.164		2.57977	-0.007		2.57964	0.057		2.57989	-0.082
2.58142	0.168		2.58143	-0.003		2.58131	0.052		2.58155	-0.083
2.58308	0.171		2.5831	0.001		2.58297	0.05		2.58322	-0.082
2.58475	0.175		2.58477	0.002		2.58464	0.045		2.58488	-0.088
2.58725	0.174		2.58727	0.006		2.58714	0.041		2.58739	-0.092
2.58809	0.171		2.5881	0.006		2.58797	0.04		2.58822	-0.094
2.58976	0.171		2.58977	0.01		2.58964	0.042		2.58989	-0.098
2.59142	0.167		2.59143	0.01		2.5913	0.039		2.59155	-0.102
2.59309	0.16		2.5931	0.009		2.59297	0.043		2.59322	-0.109
2.59559	0.15		2.5956	0.004		2.59548	0.043		2.59572	-0.112
2.59642	0.144		2.59644	0.004		2.59631	0.044		2.59656	-0.117
2.59809	0.144		2.59811	0.001		2.59798	0.047		2.59822	-0.119
2.59975	0.139		2.59977	0		2.59964	0.052		2.59989	-0.121
2.60142	0.125		2.60144	-0.005		2.60131	0.057		2.60155	-0.127
2.60309	0.12		2.60311	-0.011		2.60381	0.067		2.60406	-0.13
2.60476	0.113		2.60477	-0.015		2.60465	0.074		2.60489	-0.135
2.60642	0.112		2.60644	-0.024		2.60631	0.083		2.60656	-0.139
2.60809	0.11		2.6081	-0.03		2.60798	0.095		2.60823	-0.14
2.60975	0.109		2.60977	-0.039		2.60965	0.099		2.60989	-0.14
2.61226	0.111		2.61227	-0.043		2.61215	0.104		2.61156	-0.14
2.61309	0.117		2.61311	-0.048		2.61298	0.104		2.61323	-0.14
2.61476	0.124		2.61477	-0.048		2.61465	0.105		2.61489	-0.139
2.61642	0.133		2.61644	-0.048		2.61631	0.104		2.61656	-0.138
2.61809	0.143		2.6181	-0.048		2.61798	0.105		2.61823	-0.132
2.62059	0.153		2.62061	-0.045		2.62048	0.101		2.62073	-0.12
2.62143	0.161		2.62144	-0.043		2.62132	0.101		2.62156	-0.12
2.62309	0.166		2.62311	-0.043		2.62299	0.1		2.62323	-0.109
2.62476	0.175		2.62477	-0.045		2.62465	0.096		2.62489	-0.101
2.62642	0.175		2.62644	-0.046		2.62632	0.094		2.62656	-0.088
2.62893	0.178		2.62894	-0.045		2.62882	0.091		2.62906	-0.065
2.62976	0.178		2.62978	-0.049		2.62965	0.085		2.6299	-0.05
2.63143	0.173		2.63145	-0.047		2.63132	0.085		2.63157	-0.05
2.63309	0.173		2.63311	-0.05		2.63298	0.078		2.63323	-0.027
2.63476	0.166		2.63478	-0.051		2.63464	0.071		2.6349	-0.027
2.63726	0.158		2.63728	-0.057		2.63715	0.062		2.6374	-0.01
2.6381	0.158		2.63811	-0.062		2.63798	0.062		2.63823	0
2.63976	0.148		2.63978	-0.067		2.63965	0.058		2.6399	0
2.64143	0.141		2.64145	-0.071		2.64132	0.053		2.64156	0.019
2.64309	0.129		2.64311	-0.074		2.64298	0.054		2.64323	0.027
2.6456	0.116		2.64562	-0.081		2.64548	0.054		2.64574	0.035
2.64643	0.111		2.64645	-0.085		2.64632	0.059		2.64657	0.045
2.6481	0.111		2.64812	-0.091		2.64798	0.063		2.64824	0.051
2.64976	0.107		2.64978	-0.095		2.64965	0.068		2.6499	0.057
2.65143	0.103		2.65145	-0.1		2.65132	0.073		2.65157	0.06
2.65393	0.105		2.65395	-0.102		2.65298	0.079		2.65407	0.062
2.65477	0.106		2.65479	-0.105		2.65466	0.081		2.65491	0.058
2.65643	0.106		2.65645	-0.108		2.65632	0.089		2.65657	0.053
2.6581	0.112		2.65812	-0.109		2.65799	0.094		2.65824	0.044
2.65976	0.12		2.65978	-0.113		2.65965	0.097		2.6599	0.037
2.66227	0.125		2.66229	-0.107		2.66216	0.093		2.66241	0.029
2.6631	0.136		2.66312	-0.107		2.66299	0.09		2.66324	0.021
2.66477	0.143		2.66479	-0.102		2.66466	0.085		2.66491	0.012
2.66643	0.152		2.66645	-0.101		2.66632	0.081		2.66657	-0.002
2.6681	0.162		2.66812	-0.099		2.66799	0.073		2.66824	-0.011
2.6706	0.173		2.67062	-0.093		2.67049	0.067		2.67074	-0.021
2.67144	0.183		2.67146	-0.088		2.67133	0.059		2.67158	-0.036
2.6731	0.191		2.67313	-0.088		2.67299	0.052		2.67324	-0.051
2.67477	0.196		2.67479	-0.079		2.67466	0.042		2.67491	-0.067
2.67643	0.201		2.67646	-0.074		2.67632	0.038		2.67657	-0.078
2.67894	0.203		2.67896	-0.066		2.67883	0.026		2.67908	-0.102
2.67977	0.202		2.67979	-0.057		2.67966	0.026		2.67991	-0.102
2.68144	0.202		2.68146	-0.057		2.68133	0.017		2.68158	-0.112
2.6831	0.2		2.68312	-0.054		2.68299	0.01		2.68325	-0.122
2.68477	0.199		2.68479	-0.049		2.68466	0.005		2.68491	-0.126
2.68726	0.197		2.6873	-0.039		2.68716	-0.006		2.68742	-0.134
2.6881	0.196		2.68813	-0.036		2.688	-0.01		2.68825	-0.134
2.68977	0.194		2.6898	-0.035		2.68966	-0.01		2.68991	-0.134
2.69143	0.191		2.69146	-0.035		2.69133	-0.01		2.69158	-0.137
2.6931	0.191		2.69313	-0.036		2.693	-0.012		2.69324	-0.137
2.6956	0.191		2.69563	-0.037		2.6955	-0.015		2.69575	-0.144
2.69643	0.191		2.69647	-0.04		2.69633	-0.013		2.69659	-0.148
2.6981	0.197		2.69813	-0.041		2.698	-0.013		2.69825	-0.148
2.69976	0.201		2.6998	-0.045		2.69967	-0.011		2.69992	-0.155
2.70143	0.2		2.70146	-0.048		2.70133	-0.011		2.70158	-0.155
2.7031	0.2		2.70397	-0.048		2.70383	-0.009		2.70409	-0.166
2.70477	0.197		2.7048	-0.05		2.70467	-0.009		2.70492	-0.171
2.70643	0.194		2.70647	-0.052		2.70634	-0.007		2.70658	-0.178
2.7081	0.189		2.70813	-0.051		2.708	-0.013		2.70824	-0.185
2.70976	0.182		2.7098	-0.045		2.70967	-0.018		2.70991	-0.187
2.71227	0.162		2.7123	-0.041		2.71217	-0.023		2.71158	-0.195
2.7131	0.146		2.71314	-0.031		2.71301	-0.031		2.71325	-0.2
2.71477	0.146		2.71481	-0.023		2.71467	-0.04		2.71491	-0.204
2.71643	0.129		2.71647	-0.012		2.71634	-0.048		2.71658	-0.209
2.7181	0.11		2.71814	-0.004		2.718	-0.056		2.71824	-0.211
2.7206	0.075		2.71981	0.007		2.72051	-0.065		2.72075	-0.209
2.72144	0.056		2.72147	0.013		2.72134	-0.071		2.72158	-0.207
2.7231	0.034		2.72314	0.017		2.72301	-0.075		2.72325	-0.206
2.72477	0.013		2.72479	0.02		2.72467	-0.076		2.72491	-0.202
2.72643	-0.007		2.72646	0.018		2.72634	-0.074		2.72658	-0.198
2.72894	-0.024		2.72897	0.009		2.72884	-0.071		2.72908	-0.191
2.72977	-0.038		2.7298	0.009		2.72968	-0.065		2.72992	-0.18
2.73144	-0.05		2.73146	0.002		2.73134	-0.062		2.73158	-0.172
2.7331	-0.059		2.73313	-0.005		2.73301	-0.057		2.73325	-0.161
2.73477	-0.066		2.73479	-0.009		2.73468	-0.055		2.73491	-0.154
2.73727	-0.073		2.7373	-0.019		2.73634	-0.053		2.73742	-0.137
2.73811	-0.077		2.73814	-0.023		2.73801	-0.054		2.73825	-0.137
2.73977	-0.075		2.7398	-0.023		2.73967	-0.056		2.73992	-0.13
2.74144	-0.074		2.74147	-0.026		2.74134	-0.053		2.74158	-0.125
2.7431	-0.07		2.74313	-0.027		2.74301	-0.05		2.74325	-0.122
2.74561	-0.067		2.74564	-0.03		2.74551	-0.049		2.74575	-0.119
2.74644	-0.067		2.74647	-0.033		2.74718	-0.049		2.74659	-0.119
2.74811	-0.067		2.74813	-0.035		2.74802	-0.049		2.74825	-0.12
2.74977	-0.067		2.7498	-0.04		2.74968	-0.054		2.74992	-0.12
2.75144	-0.069		2.75147	-0.042		2.75135	-0.059		2.75159	-0.12
2.75394	-0.069		2.75397	-0.042		2.75385	-0.073		2.75409	-0.12
2.75478	-0.069		2.75481	-0.041		2.75552	-0.079		2.75492	-0.12
2.75644	-0.069		2.75647	-0.038		2.75636	-0.079		2.75659	-0.12
2.75811	-0.069		2.75814	-0.031		2.75802	-0.088		2.75826	-0.114
2.75977	-0.069		2.7598	-0.025		2.75969	-0.092		2.75992	-0.114
2.76228	-0.063		2.76231	-0.017		2.76219	-0.103		2.76242	-0.103
2.76311	-0.058		2.76314	-0.01		2.76302	-0.103		2.76326	-0.094
2.76478	-0.058		2.76481	-0.004		2.76469	-0.108		2.76493	-0.084
2.76644	-0.051		2.76647	0		2.76636	-0.11		2.76659	-0.075
2.76811	-0.045		2.76814	0.007		2.76802	-0.109		2.76826	-0.06
2.77061	-0.024		2.77065	0.012		2.77053	-0.113		2.77076	-0.049
2.77145	-0.016		2.77148	0.016		2.77219	-0.112		2.7716	-0.036
2.77311	-0.016		2.77314	0.024		2.77303	-0.114		2.77326	-0.021
2.77478	-0.007		2.77481	0.022		2.7747	-0.114		2.77493	-0.009
2.77644	0.006		2.77647	0.028		2.77636	-0.113		2.77659	0
2.77895	0.014		2.77898	0.029		2.77886	-0.111		2.7791	0.007
2.77978	0.018		2.77982	0.029		2.78053	-0.108		2.77993	0.013
2.78145	0.019		2.78148	0.027		2.78136	-0.098		2.7816	0.014
2.78311	0.02		2.78315	0.028		2.78303	-0.096		2.78326	0.014
2.78478	0.019		2.78481	0.03		2.78469	-0.086		2.78493	0.015
2.78645	0.022		2.78732	0.038		2.7872	-0.081		2.78743	0.01
2.78811	0.023		2.78815	0.038		2.78887	-0.074		2.78827	0.009
2.78978	0.023		2.78981	0.04		2.7897	-0.07		2.78993	0.004
2.79144	0.025		2.79148	0.043		2.79137	-0.066		2.7916	0.002
2.79311	0.026		2.79315	0.041		2.79303	-0.061		2.79327	0
2.79561	0.029		2.79565	0.045		2.79554	-0.053		2.79577	-0.005
2.79644	0.031		2.79649	0.045		2.79721	-0.049		2.7966	-0.005
2.79811	0.034		2.79815	0.045		2.79804	-0.049		2.79827	-0.009
2.79977	0.034		2.79982	0.043		2.79971	-0.046		2.79993	-0.008
2.80144	0.038		2.80148	0.042		2.80137	-0.044		2.8016	-0.008
2.80399	0.039		2.80399	0.043		2.80388	-0.046		2.8041	-0.011
2.80478	0.039		2.80482	0.043		2.80555	-0.044		2.80494	-0.011
2.80644	0.036		2.80649	0.043		2.80638	-0.044		2.80661	-0.014
2.80811	0.036		2.80815	0.046		2.80805	-0.039		2.80827	-0.018
2.80977	0.037		2.80982	0.047		2.80971	-0.033		2.80994	-0.019
2.81144	0.037		2.81232	0.047		2.81222	-0.028		2.81244	-0.023
2.81311	0.041		2.81316	0.046		2.81388	-0.02		2.81327	-0.026
2.81477	0.046		2.81482	0.045		2.81472	-0.02		2.81494	-0.026
2.81644	0.05		2.81649	0.04		2.81639	-0.018		2.81661	-0.032
2.8181	0.058		2.81815	0.035		2.81805	-0.015		2.81827	-0.032
2.82061	0.073		2.82066	0.024		2.82056	-0.007		2.82078	-0.04
2.82144	0.073		2.8215	0.015		2.82223	-0.006		2.82161	-0.046
2.82311	0.082		2.82316	0		2.82306	-0.006		2.82328	-0.046
2.82477	0.091		2.82483	-0.011		2.82473	-0.004		2.82494	-0.053
2.82644	0.1		2.82649	-0.025		2.82639	0.001		2.82661	-0.068
2.82894	0.114		2.82899	-0.042		2.8289	0		2.82911	-0.073
2.82978	0.119		2.82983	-0.055		2.83057	-0.002		2.82995	-0.079
2.83144	0.119		2.83149	-0.072		2.8314	-0.001		2.83162	-0.085
2.8331	0.123		2.83316	-0.082		2.83307	-0.006		2.83328	-0.087
2.83477	0.122		2.83483	-0.092		2.83473	-0.01		2.83495	-0.09
2.83643	0.117		2.83733	-0.098		2.83723	-0.016		2.83745	-0.092
2.8381	0.113		2.83817	-0.101		2.83807	-0.02		2.83828	-0.094
2.83977	0.107		2.83983	-0.101		2.83974	-0.025		2.83995	-0.093
2.84143	0.1		2.8415	-0.098		2.8414	-0.024		2.84161	-0.09
2.8431	0.097		2.84316	-0.099		2.84307	-0.03		2.84328	-0.093
2.8456	0.097		2.84566	-0.089		2.84557	-0.031		2.84578	-0.088
2.84644	0.092		2.8465	-0.089		2.84724	-0.031		2.84662	-0.089
2.84811	0.094		2.84817	-0.086		2.84808	-0.028		2.84829	-0.084
2.84977	0.097		2.84983	-0.088		2.84974	-0.026		2.84995	-0.082
2.85144	0.097		2.8515	-0.087		2.85141	-0.023		2.85162	-0.079
2.85394	0.097		2.854	-0.095		2.85391	-0.016		2.85411	-0.074
2.85477	0.1		2.85484	-0.099		2.85475	-0.011		2.85495	-0.068
2.85644	0.101		2.8565	-0.099		2.85641	-0.005		2.85661	-0.062
2.8581	0.102		2.85817	-0.096		2.85808	-0.002		2.85828	-0.055
2.85977	0.101		2.85983	-0.099		2.85975	-0.001		2.85994	-0.051
2.86227	0.104		2.86234	-0.098		2.86225	-0.005		2.86245	-0.045
2.86395	0.097		2.86317	-0.092		2.86308	-0.005		2.86329	-0.045
2.86478	0.097		2.86484	-0.092		2.86475	-0.007		2.86495	-0.044
2.86644	0.096		2.8665	-0.089		2.86641	-0.01		2.86662	-0.047
2.86811	0.094		2.86817	-0.083		2.86808	-0.011		2.86828	-0.047
2.87061	0.089		2.87067	-0.078		2.87058	-0.015		2.86995	-0.05
2.87228	0.084		2.8715	-0.078		2.87225	-0.014		2.87162	-0.055
2.87312	0.084		2.87317	-0.074		2.87309	-0.014		2.87328	-0.058
2.87478	0.081		2.87483	-0.073		2.87475	-0.016		2.87495	-0.059
2.87645	0.075		2.8765	-0.071		2.87642	-0.017		2.87662	-0.062
2.87895	0.073		2.879	-0.069		2.87892	-0.018		2.87912	-0.064
2.88062	0.07		2.87984	-0.068		2.88059	-0.018		2.87996	-0.065
2.88146	0.07		2.8815	-0.066		2.88143	-0.018		2.88162	-0.065
2.88312	0.067		2.88317	-0.068		2.88309	-0.019		2.88329	-0.065
2.88479	0.062		2.88483	-0.069		2.88476	-0.021		2.88495	-0.068
2.88729	0.056		2.88734	-0.069		2.88726	-0.02		2.88745	-0.065
2.88813	0.051		2.88817	-0.07		2.88893	-0.021		2.88829	-0.066
2.88979	0.051		2.88984	-0.072		2.88977	-0.016		2.88996	-0.068
2.89146	0.048		2.8915	-0.071		2.89143	-0.013		2.89162	-0.069
2.89312	0.044		2.89317	-0.075		2.8931	-0.009		2.89329	-0.066
2.89563	0.037		2.89568	-0.086		2.8956	-0.004		2.89579	-0.065
2.89646	0.035		2.89651	-0.086		2.89727	0.001		2.89663	-0.067
2.89813	0.034		2.89817	-0.092		2.89811	0.004		2.89829	-0.067
2.89979	0.031		2.89984	-0.099		2.89977	0.005		2.89996	-0.073
2.90146	0.025		2.9015	-0.107		2.90144	0.007		2.90162	-0.078
2.90396	0.024		2.90401	-0.12		2.90394	0.007		2.90413	-0.085
2.9048	0.02		2.90485	-0.12		2.90478	0.013		2.90496	-0.094
2.90646	0.013		2.90651	-0.124		2.90644	0.014		2.90663	-0.101
2.90813	0.009		2.90818	-0.127		2.90811	0.016		2.90829	-0.109
2.90979	0.002		2.90984	-0.13		2.90977	0.016		2.90996	-0.115
2.91146	-0.003		2.91235	-0.137		2.91144	0.015		2.91246	-0.125
2.91313	-0.01		2.91318	-0.137		2.91311	0.014		2.9133	-0.127
2.9148	-0.016		2.91484	-0.137		2.91478	0.014		2.91497	-0.129
2.91646	-0.017		2.91651	-0.134		2.91644	0.01		2.91663	-0.134
2.91813	-0.025		2.91818	-0.134		2.91811	0.003		2.9183	-0.135
2.92075	-0.032		2.92068	-0.128		2.92061	0		2.9208	-0.134
2.92147	-0.037		2.92152	-0.123		2.92228	0.002		2.92163	-0.134
2.92313	-0.042		2.92318	-0.123		2.92311	0.002		2.9233	-0.131
2.9248	-0.048		2.92485	-0.117		2.92478	0.004		2.92496	-0.127
2.92646	-0.052		2.92651	-0.102		2.92644	0.008		2.92663	-0.12
2.92897	-0.069		2.92902	-0.09		2.92895	0.015		2.92913	-0.107
2.9298	-0.069		2.92985	-0.078		2.93061	0.016		2.92997	-0.107
2.93147	-0.078		2.93152	-0.064		2.93145	0.016		2.93164	-0.099
2.93313	-0.087		2.93318	-0.053		2.93312	0.022		2.9333	-0.092
2.9348	-0.093		2.93485	-0.041		2.93478	0.025		2.93497	-0.087
2.9373	-0.106		2.93736	-0.029		2.93729	0.027		2.93747	-0.077
2.93814	-0.106		2.93819	-0.017		2.93812	0.027		2.9383	-0.075
2.9398	-0.112		2.93985	-0.01		2.93979	0.031		2.93997	-0.075
2.94147	-0.116		2.94152	-0.002		2.94145	0.031		2.94164	-0.074
2.94313	-0.121		2.94318	-0.002		2.94312	0.029		2.9433	-0.071
2.9448	-0.121		2.94569	0.001		2.94479	0.024		2.94581	-0.068
2.94647	-0.121		2.94653	0		2.94646	0.022		2.94664	-0.068
2.94814	-0.12		2.94819	0		2.94812	0.016		2.94831	-0.068
2.9498	-0.118		2.94986	-0.003		2.94979	0.013		2.94997	-0.067
2.95147	-0.111		2.95152	-0.003		2.95145	0.006		2.95164	-0.071
2.95397	-0.1		2.95403	-0.007		2.95396	0.003		2.95414	-0.069
2.9548	-0.1		2.95486	-0.014		2.95563	0		2.95498	-0.07
2.95647	-0.084		2.95652	-0.013		2.95646	-0.003		2.95665	-0.072
2.95813	-0.077		2.95819	-0.015		2.95813	-0.009		2.95831	-0.072
2.9598	-0.071		2.95986	-0.018		2.95979	-0.012		2.95998	-0.074
2.96147	-0.064		2.96236	-0.022		2.96146	-0.018		2.96248	-0.068
2.96313	-0.06		2.9632	-0.022		2.96313	-0.015		2.96331	-0.07
2.9648	-0.051		2.96486	-0.023		2.9648	-0.012		2.96498	-0.071
2.96646	-0.047		2.96653	-0.027		2.96646	-0.006		2.96664	-0.072
2.96813	-0.04		2.96819	-0.027		2.96813	0		2.96831	-0.077
2.97063	-0.034		2.9707	-0.037		2.97063	0.018		2.97081	-0.083
2.97231	-0.032		2.97153	-0.037		2.97147	0.018		2.97165	-0.09
2.97314	-0.028		2.9732	-0.045		2.97313	0.029		2.97332	-0.096
2.9748	-0.028		2.97486	-0.054		2.9748	0.038		2.97498	-0.101
2.97647	-0.025		2.97653	-0.063		2.97646	0.048		2.97665	-0.108
2.97897	-0.027		2.97903	-0.079		2.97897	0.065		2.97915	-0.11
2.98064	-0.023		2.97987	-0.089		2.9798	0.065		2.97999	-0.11
2.98147	-0.018		2.98153	-0.089		2.98147	0.066		2.98165	-0.108
2.98314	-0.017		2.9832	-0.092		2.98314	0.069		2.98332	-0.107
2.9848	-0.01		2.98486	-0.098		2.9848	0.069		2.98498	-0.106
2.98647	-0.009		2.98737	-0.1		2.9873	0.062		2.98749	-0.09
2.98814	-0.006		2.9882	-0.1		2.98814	0.062		2.98916	-0.086
2.98981	-0.002		2.98987	-0.093		2.98981	0.059		2.98999	-0.086
2.99147	0		2.99154	-0.091		2.99147	0.054		2.99166	-0.08
2.99314	0		2.9932	-0.091		2.99314	0.046		2.99332	-0.08
2.99564	-0.001		2.9957	-0.087		2.9948	0.037		2.99583	-0.075
2.99648	-0.001		2.99654	-0.086		2.99648	0.037		2.99666	-0.075
2.99814	0.003		2.9982	-0.084		2.99814	0.032		2.99833	-0.075
2.99981	0.003		2.99987	-0.082		2.99981	0.028		2.99998	-0.074
3.00147	0.008		3.00154	-0.075		3.00147	0.024		3.00165	-0.07
3.00397	0.002		3.00488	-0.07		3.00397	0.019		3.00415	-0.065
3.00481	0.004		3.00655	-0.068		3.00481	0.015		3.00583	-0.062
3.00648	0.004		3.00738	-0.068		3.00648	0.012		3.00666	-0.058
3.00814	0.004		3.00821	-0.066		3.00814	0.009		3.00832	-0.055
3.00981	0.004		3.00988	-0.064		3.00981	0.015		3.00999	-0.053
3.01231	0.004		3.01238	-0.064		3.01231	0.015		3.01249	-0.053
3.01315	0.006		3.01322	-0.068		3.01315	0.021		3.01333	-0.051
3.01481	0.006		3.01488	-0.068		3.01481	0.025		3.015	-0.045
3.01648	0.004		3.01654	-0.07		3.01648	0.032		3.01666	-0.045
3.01814	0.007		3.01821	-0.071		3.01814	0.04		3.01833	-0.044
3.01981	0.007		3.02071	-0.08		3.02148	0.051		3.02083	-0.048
3.02148	0.009		3.02155	-0.08		3.02232	0.051		3.0225	-0.05
3.02315	0.011		3.02321	-0.087		3.02315	0.06		3.02333	-0.053
3.02481	0.013		3.02488	-0.09		3.02482	0.067		3.025	-0.06
3.02648	0.015		3.02654	-0.095		3.02649	0.077		3.02666	-0.074
3.02814	0.02		3.02905	-0.095		3.02899	0.085		3.02917	-0.084
3.02982	0.023		3.02988	-0.095		3.02982	0.093		3.03084	-0.097
3.03148	0.024		3.03155	-0.095		3.03149	0.098		3.03167	-0.108
3.03315	0.026		3.03321	-0.094		3.03315	0.103		3.03334	-0.117
3.03481	0.032		3.03488	-0.089		3.03482	0.103		3.03501	-0.128
3.03648	0.029		3.03655	-0.078		3.03732	0.095		3.03751	-0.139
3.03815	0.031		3.03822	-0.078		3.03816	0.095		3.03918	-0.142
3.03982	0.032		3.03988	-0.069		3.03983	0.092		3.04002	-0.142
3.04148	0.031		3.04155	-0.063		3.04149	0.082		3.04168	-0.142
3.04315	0.03		3.04321	-0.058		3.04316	0.076		3.04335	-0.142
3.04482	0.028		3.04572	-0.047		3.04483	0.065		3.04585	-0.138
3.04649	0.028		3.04655	-0.047		3.04649	0.061		3.04752	-0.134
3.04815	0.029		3.04822	-0.039		3.04816	0.056		3.04836	-0.134
3.04982	0.026		3.04988	-0.04		3.04983	0.051		3.05002	-0.128
3.05148	0.025		3.05155	-0.037		3.05149	0.049		3.05169	-0.124
3.05315	0.021		3.05405	-0.036		3.05316	0.047		3.05419	-0.114
3.05482	0.02		3.05489	-0.029		3.05483	0.047		3.05586	-0.109
3.05649	0.02		3.05655	-0.024		3.0565	0.047		3.05669	-0.109
3.05815	0.015		3.05822	-0.02		3.05816	0.045		3.05836	-0.102
3.05982	0.017		3.05988	-0.014		3.05983	0.043		3.06002	-0.102
3.06149	0.013		3.06155	-0.012		3.0615	0.038		3.06253	-0.099
3.06316	0.009		3.06322	-0.006		3.06317	0.038		3.0642	-0.097
3.06482	0.007		3.06489	-0.008		3.06483	0.036		3.06503	-0.097
3.06649	0.001		3.06656	-0.009		3.0665	0.037		3.0667	-0.094
3.06815	-0.001		3.06822	-0.013		3.06816	0.038		3.06836	-0.093
3.06982	-0.007		3.07072	-0.018		3.07066	0.035		3.07087	-0.093
3.07149	-0.007		3.07156	-0.026		3.07149	0.034		3.07254	-0.095
3.07316	-0.008		3.07322	-0.031		3.07316	0.032		3.07337	-0.096
3.07482	-0.011		3.07489	-0.033		3.07482	0.028		3.07504	-0.097
3.07649	-0.011		3.07656	-0.034		3.07649	0.027		3.07671	-0.098
3.07899	-0.015		3.07906	-0.04		3.07899	0.02		3.07921	-0.1
3.07983	-0.012		3.0799	-0.04		3.08066	0.016		3.08088	-0.102
3.08149	-0.013		3.08156	-0.037		3.0815	0.01		3.08171	-0.1
3.08316	-0.01		3.08323	-0.035		3.08316	0.007		3.08338	-0.098
3.08482	-0.006		3.08489	-0.032		3.08483	0.003		3.08504	-0.096
3.08649	-0.006		3.08739	-0.027		3.08733	0.002		3.08755	-0.089
3.08816	-0.006		3.08823	-0.027		3.089	0.006		3.08922	-0.087
3.08983	-0.006		3.0899	-0.024		3.08984	0.006		3.09005	-0.086
3.09149	-0.002		3.09156	-0.019		3.0915	0.011		3.09172	-0.085
3.09316	0.002		3.09323	-0.019		3.09317	0.017		3.09338	-0.087
3.09566	0.004		3.09573	-0.017		3.09484	0.021		3.09589	-0.091
3.0965	0.007		3.09657	-0.017		3.0965	0.029		3.09672	-0.091
3.09816	0.01		3.09823	-0.017		3.09817	0.037		3.09839	-0.092
3.09983	0.017		3.0999	-0.023		3.09984	0.044		3.10006	-0.092
3.10149	0.024		3.10156	-0.029		3.1015	0.049		3.10172	-0.091
3.10316	0.028		3.10323	-0.044		3.10401	0.052		3.10423	-0.086
3.10483	0.033		3.1049	-0.044		3.10484	0.055		3.10506	-0.086
3.1065	0.041		3.10656	-0.055		3.10651	0.055		3.10672	-0.082
3.10816	0.044		3.10823	-0.061		3.10817	0.05		3.10839	-0.075
3.10983	0.05		3.10989	-0.058		3.10984	0.049		3.11005	-0.068
3.1115	0.056		3.11156	-0.062		3.11151	0.038		3.11256	-0.052
3.11317	0.06		3.11323	-0.062		3.11318	0.038		3.11423	-0.046
3.11483	0.064		3.11489	-0.065		3.11485	0.033		3.11506	-0.046
3.1165	0.063		3.11656	-0.062		3.11651	0.033		3.11673	-0.026
3.11816	0.063		3.11823	-0.06		3.11818	0.025		3.1184	-0.026
3.11983	0.06		3.12073	-0.059		3.11984	0.023		3.1209	-0.01
3.1215	0.055		3.12157	-0.056		3.12151	0.021		3.12257	-0.004
3.12316	0.051		3.12323	-0.056		3.12318	0.019		3.12341	0.003
3.12482	0.045		3.1249	-0.052		3.12484	0.016		3.12507	0.006
3.12649	0.042		3.12656	-0.049		3.12651	0.009		3.12674	0.012
3.12816	0.028		3.12823	-0.046		3.12901	0.005		3.12924	0.013
3.12983	0.028		3.1299	-0.041		3.13068	0.002		3.13007	0.012
3.1315	0.024		3.13157	-0.036		3.13152	-0.002		3.13174	0.012
3.13316	0.016		3.13323	-0.032		3.13319	-0.006		3.1334	0.009
3.13483	0.012		3.1349	-0.027		3.13485	-0.006		3.13507	0.01
3.13649	0.006		3.1374	-0.02		3.13736	-0.008		3.13762	0.006
3.13816	0.006		3.13823	-0.02		3.13819	-0.01		3.13924	0.002
3.13983	0.003		3.1399	-0.021		3.13985	-0.013		3.14008	0.001
3.14149	0.005		3.14157	-0.016		3.14152	-0.011		3.14174	-0.002
3.14316	0.007		3.14323	-0.016		3.14318	-0.009		3.14341	-0.008
3.14483	0.012		3.14574	-0.012		3.14569	-0.001		3.1459	-0.015
3.1465	0.017		3.14657	-0.012		3.14653	0.004		3.14674	-0.024
3.14817	0.024		3.14824	-0.01		3.14819	0.012		3.1484	-0.033
3.14983	0.031		3.1499	-0.013		3.14986	0.021		3.15007	-0.044
3.1515	0.032		3.15157	-0.01		3.15152	0.031		3.15173	-0.054
3.15316	0.04		3.15407	-0.011		3.15319	0.043		3.15424	-0.075
3.15483	0.041		3.15491	-0.012		3.15486	0.05		3.15591	-0.086
3.1565	0.049		3.15657	-0.012		3.15653	0.057		3.15674	-0.086
3.15816	0.055		3.15824	-0.014		3.15819	0.064		3.15841	-0.094
3.15983	0.062		3.1599	-0.016		3.15986	0.07		3.16008	-0.104
3.1615	0.07		3.1624	-0.008		3.16236	0.074		3.16258	-0.119
3.16317	0.078		3.16323	-0.007		3.1632	0.074		3.16341	-0.119
3.16484	0.089		3.1649	-0.008		3.16486	0.074		3.16508	-0.129
3.1665	0.097		3.16656	-0.011		3.16653	0.074		3.16674	-0.135
3.16817	0.106		3.16823	-0.012		3.16819	0.071		3.16841	-0.143
3.17067	0.116		3.1699	-0.015		3.1707	0.065		3.17091	-0.145
3.1715	0.116		3.17157	-0.019		3.17153	0.065		3.17175	-0.143
3.17317	0.123		3.17323	-0.021		3.1732	0.063		3.17342	-0.143
3.17484	0.126		3.1749	-0.025		3.17487	0.058		3.17508	-0.139
3.1765	0.129		3.17656	-0.027		3.17653	0.055		3.17675	-0.132
3.17817	0.132		3.17907	-0.033		3.17904	0.052		3.17925	-0.114
3.17984	0.131		3.1799	-0.036		3.17987	0.052		3.18092	-0.107
3.18151	0.131		3.18157	-0.039		3.18153	0.049		3.18176	-0.107
3.18317	0.132		3.18324	-0.044		3.1832	0.05		3.18342	-0.097
3.18484	0.128		3.1849	-0.049		3.18486	0.05		3.18509	-0.093
3.18734	0.126		3.18657	-0.054		3.18737	0.051		3.18759	-0.089
3.18818	0.126		3.18824	-0.06		3.18821	0.048		3.18926	-0.086
3.18984	0.122		3.1899	-0.069		3.18987	0.049		3.19009	-0.078
3.19151	0.121		3.19157	-0.074		3.19154	0.049		3.19176	-0.078
3.19317	0.118		3.19323	-0.078		3.1932	0.047		3.19342	-0.076
3.19484	0.113		3.1949	-0.086		3.19571	0.042		3.19593	-0.072
3.19651	0.113		3.19658	-0.092		3.19654	0.04		3.19677	-0.07
3.19818	0.11		3.19824	-0.096		3.19821	0.036		3.19843	-0.07
3.19984	0.105		3.19991	-0.103		3.19987	0.036		3.2001	-0.071
3.20151	0.098		3.20157	-0.107		3.20154	0.031		3.20176	-0.07
3.20401	0.091		3.20324	-0.111		3.20404	0.026		3.20427	-0.066
3.20485	0.086		3.20491	-0.11		3.20488	0.021		3.20594	-0.059
3.20651	0.083		3.20657	-0.109		3.20654	0.018		3.20677	-0.055
3.20818	0.083		3.20824	-0.106		3.20821	0.011		3.20844	-0.049
3.20984	0.078		3.20991	-0.102		3.20987	0.005		3.2101	-0.04
3.21151	0.077		3.21241	-0.091		3.21238	0.001		3.21177	-0.036
3.21318	0.079		3.21325	-0.086		3.21321	0.001		3.21344	-0.038
3.21485	0.083		3.21491	-0.086		3.21487	0.002		3.21511	-0.033
3.21651	0.085		3.21658	-0.082		3.21654	0.005		3.21677	-0.033
3.21818	0.088		3.21824	-0.079		3.2182	0.012		3.21844	-0.034
3.22068	0.093		3.22075	-0.075		3.22071	0.029		3.22094	-0.037
3.22152	0.098		3.22158	-0.075		3.22154	0.029		3.22178	-0.037
3.22318	0.104		3.22325	-0.073		3.22321	0.037		3.22344	-0.039
3.22485	0.115		3.22491	-0.072		3.22487	0.044		3.22511	-0.039
3.22651	0.122		3.22658	-0.072		3.22654	0.051		3.22677	-0.037
3.22818	0.132		3.22908	-0.069		3.22904	0.053		3.22928	-0.027
3.22985	0.145		3.22992	-0.067		3.22988	0.053		3.23011	-0.022
3.23152	0.159		3.23158	-0.062		3.23154	0.053		3.23178	-0.015
3.23318	0.173		3.23325	-0.057		3.23321	0.052		3.23344	-0.012
3.23485	0.187		3.23491	-0.053		3.23487	0.049		3.23511	-0.012
3.23735	0.214		3.23742	-0.051		3.23738	0.039		3.23761	-0.003
3.23819	0.214		3.23825	-0.05		3.23821	0.035		3.23845	-0.002
3.23985	0.228		3.23992	-0.046		3.23988	0.033		3.24011	-0.002
3.24152	0.235		3.24158	-0.049		3.24154	0.032		3.24178	0.001
3.24318	0.244		3.24325	-0.055		3.24321	0.026		3.24345	0.003
3.24568	0.254		3.24492	-0.058		3.24571	0.024		3.24595	0.008
3.24652	0.254		3.24659	-0.064		3.24655	0.02		3.24762	0.009
3.24818	0.259		3.24826	-0.069		3.24821	0.013		3.24846	0.012
3.24985	0.259		3.24992	-0.078		3.24988	0.005		3.25012	0.018
3.25151	0.264		3.25159	-0.088		3.25154	0		3.25179	0.018
3.25318	0.268		3.25409	-0.108		3.25405	-0.004		3.25429	0.02
3.25485	0.268		3.25492	-0.108		3.25488	-0.006		3.25512	0.021
3.25652	0.268		3.25659	-0.117		3.25655	-0.005		3.25679	0.02
3.25818	0.267		3.25826	-0.125		3.25822	-0.005		3.25845	0.02
3.25985	0.267		3.25992	-0.136		3.25988	-0.005		3.26012	0.016
3.26152	0.274		3.26242	-0.15		3.26155	-0.004		3.26263	0.012
3.26319	0.276		3.26326	-0.15		3.26322	0		3.26346	0.011
3.26485	0.279		3.26493	-0.157		3.26488	0.002		3.26513	0.005
3.26652	0.282		3.26659	-0.164		3.26655	0.006		3.26679	0
3.26818	0.286		3.26826	-0.17		3.26822	0.011		3.26846	-0.004
3.27068	0.29		3.26993	-0.178		3.27072	0.019		3.27096	-0.009
3.27151	0.291		3.27159	-0.178		3.27156	0.019		3.27263	-0.018
3.27318	0.291		3.27326	-0.181		3.27322	0.022		3.27346	-0.018
3.27485	0.291		3.27493	-0.178		3.27489	0.026		3.27513	-0.03
3.27651	0.29		3.27659	-0.176		3.27655	0.031		3.2768	-0.044
3.27818	0.287		3.27826	-0.16		3.27906	0.038		3.27847	-0.053
3.27985	0.283		3.27993	-0.16		3.27989	0.038		3.28014	-0.065
3.28152	0.279		3.28159	-0.138		3.28156	0.039		3.2818	-0.072
3.28318	0.274		3.28326	-0.126		3.28322	0.045		3.28347	-0.082
3.28485	0.268		3.28492	-0.116		3.28489	0.047		3.28513	-0.088
3.28735	0.261		3.28743	-0.106		3.28739	0.059		3.2868	-0.095
3.28819	0.249		3.28826	-0.099		3.28823	0.059		3.28847	-0.102
3.28985	0.241		3.28993	-0.089		3.28989	0.065		3.29014	-0.106
3.29152	0.226		3.29159	-0.085		3.29156	0.07		3.29179	-0.109
3.29318	0.211		3.29326	-0.081		3.29322	0.076		3.29346	-0.109
3.29568	0.18		3.29576	-0.08		3.29573	0.086		3.29596	-0.11
3.29652	0.18		3.2966	-0.075		3.29656	0.086		3.29763	-0.106
3.29819	0.164		3.29826	-0.07		3.29823	0.093		3.29847	-0.106
3.29985	0.146		3.29993	-0.068		3.2999	0.11		3.30013	-0.098
3.30152	0.125		3.30159	-0.066		3.30156	0.12		3.3018	-0.097
3.30318	0.105		3.30326	-0.067		3.30407	0.13		3.30347	-0.096
3.30486	0.084		3.30493	-0.068		3.3049	0.138		3.30514	-0.095
3.30652	0.062		3.3066	-0.069		3.30656	0.148		3.3068	-0.097
3.30819	0.041		3.30826	-0.071		3.30823	0.156		3.30847	-0.102
3.30985	0.026		3.30992	-0.077		3.30989	0.167		3.31013	-0.108
3.31236	-0.005		3.31159	-0.077		3.3124	0.177		3.31181	-0.117
3.31319	-0.005		3.31326	-0.079		3.31324	0.183		3.31348	-0.127
3.31486	-0.018		3.31493	-0.077		3.3149	0.188		3.31514	-0.137
3.31652	-0.029		3.31659	-0.079		3.31657	0.189		3.31681	-0.15
3.31819	-0.039		3.31826	-0.082		3.31823	0.192		3.31847	-0.163
3.32069	-0.054		3.31993	-0.083		3.32074	0.188		3.32014	-0.173
3.32153	-0.063		3.3216	-0.084		3.32157	0.183		3.32181	-0.187
3.32319	-0.063		3.32326	-0.083		3.32324	0.179		3.32347	-0.199
3.32486	-0.086		3.32493	-0.082		3.3249	0.171		3.32514	-0.208
3.32652	-0.097		3.3266	-0.079		3.32657	0.162		3.32681	-0.216
3.32819	-0.114		3.32826	-0.072		3.32907	0.151		3.32931	-0.222
3.32986	-0.131		3.32993	-0.072		3.32991	0.141		3.33015	-0.222
[truncated: 26,428 more rows]

## Sheet: Sheet1
	Figure 7 - Figure Supplement 2A source data
			Known Molecular Weights (kDa)	Alexa568 MW (kDa)	Total (kDa)	Calculate Molecular Weights (kDa)
		BimL	18.74	0.88	19.62	8.37708
		BimL-dCTS	16.37	0.88	17.25	27.2398
		BimL-dCTS-MAO	20.5	0.88	21.38	16.9965
			kDa	Ve	Ve/Vo	Cv	CV/Vo		Query Protein	Cv	Vc/V0
		cytc	12.4	18.2519	2.22845	0.774697	2.22845		A568-Bim	0.82	2.35876
		Carbonic Anhydrase	29	16.9806	2.07323	0.720737	2.07323		A568-BimdCTS	0.72	2.07111
		BSA	66	14.9973	1.83109	0.636559	1.83109		A568-Bim-MAO	0.76	2.18617
		Alcohol Dehydrogenase	150	13.9662	1.7052	0.592795	1.7052
		Amylase	200	13.0964	1.599	0.555874	1.599
		Blue Dex	2000	8.19039	1	0.34764	1
				Vc/Vo	MW Markers
		cytc		2.22845	1.09342
		Carbonic Anhydrase		2.07323	1.4624
		BSA		1.83109	1.81954
		Alcohol Dehydrogenase		1.7052	2.17609
		Amylase		1.599	2.30103
		Blue Dex		1	3.30103
					log mw	MW in kDA
		A568-Bim		2.35876	0.923093	8.37708
		A568-BimdCTS		2.07111	1.4352	27.2398
		A568-Bim-MAO		2.18617	1.23036	16.9965
		Dex blue	BSA	Carbonic Anhydrase and Alcohol Dehydrogenase	cytc and beta-amylase
		8.19039	14.9973	13.9662	13.0964
				16.9806	18.2519
