# Supplementary material for: The carboxyl-terminal sequence of bim enables bax activation and killing of unprimed cells
Source: eLife. 2020 Jan 24;9:e44525. doi: 10.7554/eLife.44525 (PMC6980855; doi:10.7554/eLife.44525)
Supplement: Figure 7—source data 1. [file elife-44525-fig7-data1.xlsx]

## Sheet: A) 
Figure 7
	A) Bim binding to Liposome membranes
		BimL			BimL-dCTS-MAO
		Rep 1	Rep 2	Rep 3	Rep 1	Rep 2	Rep 3
	Bound to Liposome (%)	7.2549	8.34798	8.07719	17.5826	16.1273	16.3511

## Sheet: B)
	B) Liposome Bound Bim Activation of Bax
			BimL				BimL-dCTS-MAO
	Concentration of Bax protein added (nM)		5.6nM	6.9nM	6.2nM	7.9nM	4.6nM	3.8nM	5.4nM	21.0nM	Concentration of Liposome-bound Bim (Determined by Alexa568 fluorescence)
	400		57.8376	61.4864	62.7725	76.5062	15.6119	15.7551	15.9641	17.5944
	200		48.0788	53.4496	39.431	58.8998	9.62669	9.47716	10.0473	10.765
	100		35.0744	37.9355	30.2415	43.5067	6.94209	7.88657	6.92864	6.73025
	50		20.8584	23.1827	21.7988	28.3243	4.99388	5.46027	4.60754	4.57978
	25		10.0556	12.2863	14.1898	15.2716	3.58387	3.97078	5.12383	3.05881
	12.5		4.44778	8.34241	9.74802	7.84626	3.1355	2.98048	9.46141	2.64853
	6.25		2.41487	3.73801	11.4904	4.81402	3.66058	3.04633	7.22602	2.29855
	3.125		1.78639	1.83878		3.89715	2.56538	2.81957	4.27031	2.31283
	1.5625		1.26963	1.86771		3.29189	2.56213	2.97871	4.90165	2.25806
	0.78125		0.802588	2.88633		3.07199	3.14967	2.97006	4.4807	2.5781
	0.390625		0.205064	1.50385		2.44517	2.53032	2.21635	3.49625	2.26611
	0		8.10121	0.841835	6.24251	2.27705	1.39762	1.85336	2.36465	1.39723
			*Value in well indicates ANTS Release (%)

## Sheet: C)
	C) BimL-Bax Binding in Solution
		Alexa 568 Labelled BimL			Alexa 568 Labelled BimL-dCTS-MAO
	Concentration of Alexa 647 labelled Bax added (nM)	Rep 1	Rep 2	Rep 3	Rep 1	Rep 2	Rep 3
	2000	48.7437	44.4201	50.8998	4.25909	23.656	8.51143
	1000	47.9812	37.284	41.3937	4.52363	9.15883	3.64878
	500	40.9523	41.4709	40.6713	-2.8509	9.99213	7.56136
	250	26.2439	29.394	34.2393	2.383	7.89994	0.566356
	125	30.8215	27.785	35.0189	2.18994	6.48086	4.45267
	62.5	27.2555	20.3839	30.6281	3.69099	7.29857	6.52532
	31.25	21.5916	18.4656	22.0113	1.11904	5.40209	2.43209
	15.625	11.9877	13.3551	18.9034	3.81581	5.15777	5.40503
	7.8125	10.3643	13.5318	18.1868	-1.89049	-0.61663	4.14014
	3.90625		9.21452	13.0832	10.1094	2.36892	6.62517
	1.95312	2.82204	4.09919	15.0469	0.997624	-1.85631	0.258907
	0.5	1.39555	2.38126	0.350599	-1.83469	0.254116	-0.459551
		*Value in cells indicates %FRET efficiency between Alexa 568 labelled BimL and Alexa 647 labelled Bax

## Sheet: D)
	D) Liposome bound BimL-Bax Binding
												Analysis
			BimL			BimL-dCTS-MAO
		Concentration of Bax protein added (nM)	Rep 1	Rep 2	Rep 3	Rep 1	Rep 2	Rep 3				Best-fit values	Alexa568 BimL	Alexa568 BimL-dCTS-MAO
		400	72.7784	81.1609	81.7891							BMAX	84.51	57.79
		200	72.2828	83.8083	76.4125							D	= 5	= 5
		100	74.6388	73.2746	71.4063							Kd	20.98	49.59
		50	65.5764	55.6447	52.2752							Std. Error
		25	57.2098	37.4585	37.0668							BMAX	2.925	3.209
		12.5	40.2763	21.131	18.2486							Kd	3.328	12.25
		6.25	25.7115	6.44905	13.0762							95% CI (profile likelihood)
		3.125	9.64289	7.91153	10.4177							BMAX	78.9 to 90.52	51.37 to 64.88
		1.5625	4.19586	-1.00571	5.96406							Kd	15.29 to 28.41	28.65 to 83.75
		0.78125	11.4764	5.36683	-0.54236							Goodness of Fit
		0.390625	4.78175	5.28301	-24.9701							Degrees of Freedom	40	34
		0.1	-7.6197	-8.41272	5.22825							R square	0.9524	0.8835
		1000	78.6063									Absolute Sum of Squares	2188	2465
		500	79.2924									Sy.x	7.396	8.515
		250	77.1298									Constraints
		125	70.1604									D	D = 5	D = 5
		62.5	68.3595
		0	8.13147									Number of points
		2000				56.3854	56.6527	58.5212				# of X values	54	90
		1000				52.6169	47.5903	67.5983				# Y values analyzed	42	36
		500				48.2598	54.8543	59.026
		250				41.8231	48.8424	52.8448
		125				36.0976	23.463	44.5528
		62.5				31.6666	25.5764	35.8027
		31.25				20.2018	22.2899	31.5258
		15.625				12.7501	23.5303	13.423
		7.8125				10.5958	7.09477	23.5439
		3.90625				-11.3107	1.2937	-11.9911
		1.95312				-10.9169	10.7172	3.84235
		0				-4.72087	-18.8192	-10.7276
