# Supplementary material for: The carboxyl-terminal sequence of bim enables bax activation and killing of unprimed cells
Source: eLife. 2020 Jan 24;9:e44525. doi: 10.7554/eLife.44525 (PMC6980855; doi:10.7554/eLife.44525)
Supplement: Figure 10—source data 1. [file elife-44525-fig10-data1.xlsx]

## Sheet: Figure 10
	Figure 10 - Source Data
			HEK293									MEF
			Rep 1	Rep 2	Rep 3							Rep 1	Rep 2	Rep 3
		VBimL	61.6667	49.0566	53.0303						VBimL	64.7059	69.1275	72.4138
		VBimL-dCTS	5.39216	4.5	6.96202						VBimL-dCTS	49.7487	59.8985	62.5
		VBimL-4E	3.38983	2.05479	0.568182						VBimL-4E	4.5911	6.51163	4.06977
		VBimL-I125E	36.1446	36.7347	30.6452						VBimL-I125E	46.1988	55.6452	57.5343
		VBimL-L129E	16.0714	13.0435	12.5						VBimL-L129E	42.8571	57.1429	53.9216
		VBimL-I132E	11.1111	9.1954	10.8108						VBimL-I132E	44.898	56.6667	68.1319
			*Value in cells indicates % of Venus expressing cells that are Annexin V positive									*Value in cells indicates % of Venus expressing cells that are Annexin V positive
		Tukey's multiple comparisons test	Mean Diff.	95.00% CI of diff.	Significant?	Summary	Adjusted P Value				Tukey's multiple comparisons test	Mean Diff.	95.00% CI of diff.	Significant?	Summary	Adjusted P Value
		VBimL vs. VBimL-dCTS	48.97	40.21 to 57.72	Yes	**	<0.0001				VBimL vs. VBimL-dCTS	11.37	-7.7 to 30.43	No	ns	0.3943
		VBimL vs. VBimL-4E	52.58	43.82 to 61.34	Yes	**	<0.0001				VBimL vs. VBimL-4E	63.69	44.62 to 82.76	Yes	**	<0.0001
		VBimL vs. VBimL-I125E	20.08	11.32 to 28.83	Yes	**	<0.0001				VBimL vs. VBimL-I125E	15.62	-3.444 to 34.69	No	ns	0.1347
		VBimL vs. VBimL-L129E	40.71	31.96 to 49.47	Yes	**	<0.0001				VBimL vs. VBimL-L129E	17.44	-1.625 to 36.51	No	ns	0.0804
		VBimL vs. VBimL-I132E	44.21	35.46 to 52.97	Yes	**	<0.0001				VBimL vs. VBimL-I132E	12.18	-6.883 to 31.25	No	ns	0.3276
